# Supplementary material for: Multi-omics machine learning classifier and blood transcriptomic signature of Parkinson’s disease
Source: Research Square preprint supplement (doi:10.21203/rs.3.rs-6837659/v1), 2025-06-20
Supplement: Supplementary file 5 [file ee34562d7c49982679038aa9.xlsx]

## Sheet: Discovered DE circRNA
	baseMean	log2FoldChange	lfcSE	stat	pvalue	padj	FoldChange	baseMean_raw.Control	baseMean_raw.Case
chr17_39709812_39715939_plus	12.9346	0.187492	0.0354578	5.28774	1.23837e-07	7.57576e-05	1.13878	12.4531	14.1772
chr1_17341942_17342402_plus	5.19241	0.215407	0.0409036	5.26622	1.3926e-07	7.57576e-05	1.16103	4.98744	5.68356
chrX_148651998_148662768_plus	4.27992	0.210782	0.0389844	5.40684	6.4148e-08	7.57576e-05	1.15732	4.30968	4.77709
chr16_31361835_31362753_plus	25.9205	0.135196	0.0271806	4.97397	6.5594e-07	0.000267623	1.09824	26.1811	27.3646
chrX_148661907_148662768_plus	35.88	0.119746	0.0248364	4.8214	1.42554e-06	0.000465296	1.08654	37.3555	39.0284
chr7_75162325_75163019_minus	5.47528	0.175483	0.037084	4.73204	2.22271e-06	0.000604577	1.12934	5.56024	5.94232
chr2_218385146_218387955_plus	2.50865	0.206788	0.0456534	4.52952	5.91186e-06	0.00137831	1.15412	2.52033	2.72847
chr19_11335446_11335783_minus	3.40852	0.187785	0.042168	4.45326	8.45769e-06	0.00172537	1.13901	3.18256	3.71158
chr18_76441244_76443211_minus	6.28046	0.146093	0.034393	4.24774	2.15937e-05	0.00391566	1.10657	6.31264	6.5204
chr11_47358843_47375732_minus	5.28176	0.146926	0.0352892	4.16349	3.13421e-05	0.00480941	1.10721	5.3799	5.64236
chr9_92975237_92976709_plus	2.49425	0.175239	0.0421675	4.15579	3.24164e-05	0.00480941	1.12915	2.56393	2.72064
chr3_172247532_172251541_plus	27.3082	0.0915043	0.0221284	4.13516	3.54711e-05	0.00482408	1.06548	29.5122	28.9415
chr8_132727797_132757294_minus	6.36968	0.140053	0.0345905	4.04889	5.14612e-05	0.00646036	1.10195	6.51663	6.91636
chr19_17101659_17102557_plus	16.5246	0.108089	0.0268497	4.02571	5.68045e-05	0.00662178	1.0778	17.0347	17.3247
chr1_20969473_20981227_minus	2.02452	0.177931	0.0446266	3.98711	6.68836e-05	0.00727693	1.13126	2.15595	2.25958
chr2_226864603_226867318_plus	47.5355	-0.0622686	0.0163406	-3.81067	0.000138591	0.0141363	0.957757	60.4117	55.3782
chr7_75166536_75166877_minus	2.90506	0.159064	0.0432647	3.67653	0.000236431	0.0226974	1.11656	2.88618	3.1541
chr4_1900625_1935262_plus	1.56051	-0.18199	0.0503009	-3.61802	0.000296863	0.0269156	0.881487	1.97783	1.71323
chr16_11020192_11061022_plus	24.0087	-0.0628692	0.0178726	-3.51764	0.00043541	0.0373994	0.957358	29.6268	27.2505
chr11_47358843_47360040_minus	4.92324	0.124694	0.0358729	3.47599	0.000508963	0.0395537	1.09028	4.96748	5.178
chr16_24032135_24035547_plus	4.96463	0.125896	0.0361666	3.481	0.00049954	0.0395537	1.09119	4.90983	5.33292
chr4_6923372_6924111_plus	8.0961	0.0969206	0.0279963	3.4619	0.000536369	0.0397889	1.06949	8.63267	8.822
chr10_5794884_5800705_minus	4.34175	-0.185454	0.0541083	-3.42746	0.000609264	0.0399661	0.879372	5.9357	5.18335
chr15_41356038_41377304_plus	36.1486	-0.0826152	0.0241132	-3.42614	0.000612226	0.0399661	0.944344	48.0074	43.4256
chr19_45517662_45518094_plus	5.41487	0.116366	0.0339266	3.42993	0.00060373	0.0399661	1.084	5.5595	5.71611
chr4_168400825_168458008_minus	2.23614	0.157944	0.04633	3.4091	0.000651773	0.0409113	1.1157	2.33925	2.42357
chr15_65752378_65761438_minus	12.1712	-0.0933217	0.0278574	-3.34998	0.000808187	0.0472162	0.937362	15.9468	14.9773
chr5_97101758_97103094_plus	4.10552	-0.1507	0.0451253	-3.33959	0.000839014	0.0472162	0.900813	4.85957	4.04656
chr8_38943788_38946221_plus	4.80598	0.121526	0.0363163	3.34633	0.000818887	0.0472162	1.08789	4.71175	4.99464
chr11_47358843_47375729_minus	12.4871	0.0972554	0.0294417	3.30332	0.000955476	0.0499957	1.06974	12.9032	13.1978
chr14_72981788_72993357_minus	1.67084	0.144892	0.0441004	3.28551	0.00101796	0.0499957	1.10565	1.87214	2.01483
chr19_45521321_45522818_plus	2.61289	0.149828	0.0452218	3.31318	0.000922414	0.0499957	1.10944	2.63267	2.81335
chr1_205268949_205269884_plus	4.77558	-0.104667	0.0319088	-3.28019	0.00103736	0.0499957	0.93002	6.24538	5.63288
chr21_37420298_37421866_plus	1.83046	0.161311	0.0492776	3.27352	0.00106218	0.0499957	1.1183	1.8337	1.96663
chr3_196064308_196069568_minus	5.65761	-0.116008	0.0354672	-3.27086	0.00107221	0.0499957	0.922737	7.77975	7.05727

## Sheet: Discovered DE eRNA
	baseMean	log2FoldChange	lfcSE	stat	pvalue	padj	FoldChange	baseMean_raw.Control	baseMean_raw.Case
chr5_150502330_150502460_plus	11.669	0.298015	0.0674042	4.42132	9.81e-06	0.00505572	1.22945	10.0324	13.7651
chr5_10486550_10486710_plus	10.6776	0.292361	0.0628772	4.64971	3.32e-06	0.00373377	1.22464	9.51157	12.2422
chr1_192908170_192908280_plus	10.3646	0.281712	0.0821624	3.42872	0.000606433	0.0298153	1.21564	8.87037	10.7229
chr13_109258710_109259540_minus	169.013	0.278585	0.0843362	3.30327	0.000955637	0.0377801	1.213	153.363	195.798
chr10_119360120_119360290_plus	13.1593	0.277787	0.0692549	4.01108	6.04e-05	0.0105425	1.21233	10.9421	15.8752
chr7_66314050_66314580_plus	42.1699	0.272574	0.067204	4.05591	4.99e-05	0.00932635	1.20796	38.8125	51.3725
chr10_6408310_6408670_plus	24.4538	0.265444	0.0644158	4.12079	3.78e-05	0.00838688	1.20201	23.1019	29.4018
chr5_126845460_126845720_plus	22.2751	0.259547	0.0653583	3.97115	7.15e-05	0.0114963	1.1971	19.9583	25.3321
chr16_66591170_66591300_plus	12.5416	0.255481	0.0660882	3.86576	0.000110742	0.013642	1.19373	10.5579	12.9872
chr9_77956920_77957180_plus	21.7838	0.254842	0.0559577	4.5542	5.26e-06	0.00412293	1.19321	19.6551	23.6183
chr14_77037760_77038300_minus	98.0457	0.252518	0.0616153	4.0983	4.16e-05	0.00854193	1.19128	85.2685	116.099
chr3_43749760_43760770_plus	1761.29	0.251978	0.0465526	5.41276	6.21e-08	0.000728673	1.19084	1605.08	2115.99
chr10_3470960_3471190_plus	16.9905	0.249582	0.0735587	3.39297	0.000691402	0.0316756	1.18886	15.1134	18.2239
chr18_76571910_76572040_plus	10.341	0.247689	0.0630332	3.9295	8.51e-05	0.0123849	1.1873	8.99537	11.5633
chr6_26174450_26174570_minus	22.8548	0.247109	0.0601602	4.10751	4e-05	0.00846283	1.18683	20.6343	24.0018
chr1_12157690_12158270_plus	35.9942	0.245855	0.0615057	3.99727	6.41e-05	0.0106193	1.1858	31.7338	40.9982
chr20_23061640_23061870_minus	38.45	0.244536	0.0538853	4.53809	5.68e-06	0.00412293	1.18471	35.456	42.4991
chr20_47728850_47729960_plus	116.579	0.242257	0.0579393	4.18122	2.9e-05	0.00774954	1.18284	99.5486	123.2
chr7_102898660_102898790_minus	23.9083	0.2407	0.052432	4.5907	4.42e-06	0.0040179	1.18157	21.6111	26.7321
chr17_47705670_47706530_plus	59.0593	0.236304	0.0558384	4.23193	2.32e-05	0.00701942	1.17797	51.2894	72.2661
chr15_84814680_84814810_plus	9.48559	0.236113	0.0520896	4.53283	5.82e-06	0.00412293	1.17782	8.62963	10.5927
chr19_6062830_6062950_minus	18.5028	0.235849	0.0634437	3.71745	0.00020124	0.0178583	1.1776	16.713	22.255
chr14_77038490_77038620_minus	22.7478	0.235631	0.0659139	3.57483	0.000350453	0.0231729	1.17742	19.9954	27.0312
chr6_27834980_27835120_minus	29.6698	0.233347	0.0582725	4.00442	6.22e-05	0.0106193	1.17556	26.0278	30.156
chr1_17312490_17313150_plus	46.431	0.231527	0.0552795	4.1883	2.81e-05	0.00774954	1.17408	40.3796	52.2477
chr10_6471460_6472000_plus	37.6154	0.230917	0.0535735	4.31029	1.63e-05	0.00591331	1.17358	34.412	43.0991
chr2_218370750_218371550_plus	102.448	0.228554	0.0515951	4.42977	9.43e-06	0.00505572	1.17166	87.169	108.545
chr20_47728540_47728740_plus	15.1316	0.228305	0.0671543	3.3997	0.000674592	0.0314145	1.17146	12.7523	15.811
chr1_153386790_153387090_plus	32.5911	0.224341	0.0582154	3.85364	0.000116375	0.0138681	1.16824	29.0648	32.2147
chr9_89383400_89383530_plus	10.4968	0.223799	0.0665861	3.36105	0.000776469	0.0333868	1.1678	9.63194	10.5963
chr2_63256780_63258510_plus	214.927	0.22308	0.0506699	4.40261	1.07e-05	0.00524824	1.16722	188.532	238.204
chr6_108715700_108716080_plus	26.9926	0.222774	0.0504094	4.41928	9.9e-06	0.00505572	1.16697	24.9028	31.8716
chr1_12158430_12158790_plus	29.3354	0.221661	0.0637741	3.47572	0.00050948	0.0273509	1.16608	26.3495	33.0165
chr2_101965910_101975320_plus	1257.67	0.221495	0.0479084	4.62331	3.78e-06	0.00385136	1.16594	1149.29	1449.4
chr1_33339140_33339500_plus	45.5351	0.22122	0.0667293	3.31518	0.000915827	0.0369059	1.16572	38.0394	45.3982
chr5_89432550_89433770_plus	111.889	0.220831	0.0452756	4.87747	1.07e-06	0.00244454	1.1654	100.868	122.782
chr20_60055000_60055200_plus	18.4099	0.219011	0.0660745	3.31461	0.000917697	0.0369218	1.16394	15.8032	18.5394
chr11_2836870_2838720_plus	121.686	0.218988	0.0554305	3.95068	7.79e-05	0.0120262	1.16392	102.949	146.738
chr7_106395460_106407690_plus	1328.27	0.218053	0.0545193	3.99956	6.35e-05	0.0106193	1.16316	1258.89	1494.55
chr22_36873410_36873570_plus	13.4639	0.216987	0.0645044	3.36392	0.000768443	0.0332721	1.1623	12.1829	15.4477
chr9_77951640_77952200_plus	40.1996	0.216754	0.0507061	4.27472	1.91e-05	0.00641856	1.16212	37.3403	44.2495
chr15_69724680_69725110_plus	35.2118	0.214697	0.0505104	4.25055	2.13e-05	0.0067884	1.16046	31.7083	37.8532
chr15_58505500_58505730_minus	52.7883	0.214643	0.0520032	4.12749	3.67e-05	0.00838688	1.16042	48.3981	56.756
chr20_56463320_56463480_plus	15.1241	0.214518	0.0482315	4.44768	8.68e-06	0.00505572	1.16032	13.5949	16.6055
chr2_109212900_109213180_plus	21.8736	0.213912	0.0602893	3.54809	0.000388032	0.0238587	1.15983	20.2037	25.211
chr2_109213830_109213950_plus	10.7058	0.213556	0.0649179	3.28964	0.00100316	0.0390422	1.15954	9.91898	12.2642
chr12_10244200_10244340_plus	10.0901	0.213545	0.0530353	4.02646	5.66e-05	0.010194	1.15953	9.26852	11.4459
chr1_21317790_21317900_minus	14.0876	0.212923	0.0567205	3.7539	0.000174102	0.0164411	1.15903	12.6505	17.3248
chr10_6408820_6409170_plus	22.5618	0.212292	0.0569209	3.72961	0.00019178	0.0173943	1.15853	21.2431	26.5248
chr12_89441060_89441800_plus	53.6801	0.212278	0.0597039	3.55551	0.00037725	0.0235947	1.15852	49.1736	57.3046
chr9_77960260_77960690_plus	41.5826	0.212045	0.0557154	3.80585	0.000141316	0.0152282	1.15833	38.0208	43.444
chr9_136540010_136540660_plus	70.8649	0.210395	0.0568034	3.70392	0.000212295	0.0185111	1.15701	61.8773	70.4073
chr3_46089640_46089850_minus	56.1662	0.210226	0.0638762	3.29115	0.000997787	0.0389467	1.15687	48.6042	54.1138
chr18_79693270_79693450_plus	13.4686	0.209954	0.0589145	3.56371	0.000365655	0.0232904	1.15665	11.9606	14.4917
chr22_21829620_21829800_plus	15.9438	0.209896	0.0611108	3.43467	0.00059327	0.0294575	1.1566	14.3032	16.5248
chr11_2836030_2836530_plus	33.613	0.209032	0.0649406	3.21882	0.00128721	0.0445715	1.15591	28.5556	40.4514
chr1_220788320_220788480_plus	11.6658	0.208661	0.05623	3.71084	0.000206573	0.0181385	1.15561	10.375	12.6367
chr12_10235240_10235890_plus	47.0502	0.208548	0.044821	4.65292	3.27e-06	0.00373377	1.15552	43.9977	53.2202
chr11_126401880_126402240_plus	24.8329	0.208497	0.0632782	3.29492	0.000984484	0.0386761	1.15548	21.1481	29.7174
chr2_96554940_96555150_plus	14.1601	0.20736	0.0618111	3.35473	0.000794413	0.0338098	1.15457	12.1319	15.1761
chr7_66255060_66255650_plus	61.3405	0.207155	0.059191	3.49977	0.000465664	0.0263053	1.15441	58.0069	69.5064
chr6_28253840_28255190_plus	125.101	0.206235	0.047359	4.35472	1.33e-05	0.00555715	1.15367	111.748	130.914
chr20_48776850_48778180_plus	196.632	0.205638	0.0495651	4.14885	3.34e-05	0.00838688	1.1532	175.438	200.136
chr5_10503360_10503620_plus	17.4227	0.205402	0.0588615	3.48957	0.000483793	0.0266397	1.15301	16.2153	20.5083
chr20_48760640_48761070_plus	69.3234	0.205111	0.0573269	3.57792	0.000346344	0.0231729	1.15277	59.912	68.4
chr10_6409320_6410180_plus	54.1012	0.204638	0.054286	3.76962	0.000163494	0.0158116	1.1524	51.4444	63.556
chr12_31956900_31957570_minus	200.557	0.203343	0.0396776	5.12488	2.98e-07	0.00163096	1.15136	182.134	221.51
chr20_47763750_47764130_minus	74.2876	0.202665	0.0444272	4.56174	5.07e-06	0.00412293	1.15082	65.1157	90.033
chr16_11416950_11417060_minus	23.1593	0.202317	0.0591078	3.42284	0.000619703	0.0300544	1.15054	21.6065	26.3633
chr5_173778830_173779360_plus	51.759	0.201663	0.0571671	3.52761	0.00041933	0.0248667	1.15002	47.0579	55.5303
chr12_64737620_64737740_plus	9.36337	0.201492	0.0545641	3.69276	0.00022183	0.0187544	1.14989	8.62731	10.178
chr14_64760860_64761030_plus	11.5834	0.200959	0.0515778	3.89624	9.77e-05	0.0133468	1.14946	10.5324	13.1413
chr22_29077650_29078480_plus	58.7926	0.200789	0.0587534	3.41748	0.000632026	0.0303307	1.14933	53.5324	66.4661
chr10_71726730_71726840_minus	16.7035	0.200627	0.0555158	3.61387	0.000301664	0.0218866	1.1492	14.662	19.789
chr14_77039180_77040140_minus	190.341	0.199494	0.0557707	3.57703	0.000347518	0.0231729	1.1483	170.083	221.853
chr14_68932350_68932610_minus	41.9232	0.199072	0.0444349	4.48008	7.46e-06	0.00478771	1.14796	39.6227	49.5963
chr10_6269360_6269980_plus	49.9934	0.198648	0.0624042	3.18324	0.00145636	0.0478285	1.14762	47.6852	59.411
chr5_89441030_89441220_plus	17.5175	0.19827	0.0514173	3.8561	0.000115212	0.0138615	1.14732	16.3588	18.8587
chr2_37347370_37352090_plus	523.436	0.198218	0.0448764	4.41697	1e-05	0.00505572	1.14728	467.757	555.013
chr7_66294880_66298170_plus	464.534	0.19789	0.0578063	3.42334	0.000618574	0.0300544	1.14702	434.625	538.749
chr5_10446210_10446340_plus	9.45807	0.197854	0.0555506	3.56169	0.000368472	0.0234036	1.14699	8.50694	10.1523
chr12_10245850_10245980_plus	10.107	0.197795	0.0613846	3.22222	0.00127202	0.0445049	1.14694	9.46991	11.7046
chr7_66256320_66257060_plus	58.6129	0.19637	0.0569784	3.4464	0.000568105	0.0287359	1.14581	55.0139	67.5541
chr7_102890020_102891830_minus	388.214	0.196091	0.0454528	4.31417	1.6e-05	0.00591068	1.14559	363.792	442.022
chr22_42421100_42422310_minus	202.303	0.1959	0.051534	3.80137	0.000143901	0.0152282	1.14544	175.146	245.694
chr1_12154960_12155850_plus	92.0114	0.195036	0.0546661	3.56778	0.000360022	0.0232213	1.14475	83.2917	103.435
chr20_1854360_1854750_minus	58.1319	0.194802	0.0473616	4.11308	3.9e-05	0.00838688	1.14457	53.081	69.8037
chr5_89437180_89439080_plus	172.431	0.193891	0.0436246	4.44454	8.81e-06	0.00505572	1.14384	158.34	185.279
chr10_6407360_6407830_plus	45.2198	0.19381	0.0576507	3.3618	0.000774362	0.0333535	1.14378	42.75	53.3394
chr17_3911640_3911850_minus	49.4345	0.193571	0.0497286	3.89255	9.92e-05	0.0133899	1.14359	43.5833	55.255
chr19_13847420_13847950_plus	73.6935	0.193477	0.054089	3.57702	0.000347538	0.0231729	1.14352	65.0208	72.2514
chr12_68787830_68788020_plus	14.019	0.193281	0.0541844	3.56709	0.000360963	0.0232213	1.14336	12.7407	14.8899
chr11_2560810_2560970_plus	12.0502	0.192859	0.0600703	3.21055	0.00132483	0.0452302	1.14303	10.5208	13.8917
chr6_41224810_41225050_minus	42.3549	0.192789	0.0500745	3.85004	0.000118098	0.013959	1.14297	39.6065	48.0569
chr2_109480910_109481150_plus	20.5261	0.192486	0.0559166	3.44238	0.000576629	0.0289181	1.14273	19.1111	23.4294
chr16_66224120_66224250_minus	23.726	0.191964	0.0480171	3.99782	6.39e-05	0.0106193	1.14232	21.3148	26.0844
chrX_30593610_30593730_minus	19.4274	0.190561	0.0480671	3.96447	7.36e-05	0.0116506	1.14121	18.3542	22.0899
chr5_140274570_140276610_plus	161.199	0.190306	0.0408637	4.65709	3.21e-06	0.00373377	1.14101	148.731	184.468
chr5_142798370_142798480_minus	24.0055	0.189295	0.0524416	3.60964	0.000306627	0.0218866	1.14021	21.7106	24.6459
chr18_77001250_77001370_minus	20.9996	0.188833	0.0391115	4.82808	1.38e-06	0.00246416	1.13984	19.2593	23.6404
chr10_6274490_6275990_plus	127.573	0.188318	0.0574383	3.27861	0.00104321	0.0399235	1.13943	121.877	150.024
chr10_6270120_6274350_plus	311.745	0.18768	0.0555378	3.37932	0.00072666	0.0327063	1.13893	297.662	371.178
chr20_665590_672580_plus	1220.95	0.187244	0.0474501	3.94613	7.94e-05	0.0121194	1.13859	1113.18	1459.81
chr2_112680690_112681800_plus	100.396	0.187009	0.0454603	4.11367	3.89e-05	0.00838688	1.1384	91.5185	104.453
chr10_6204630_6206400_plus	184.476	0.18671	0.0492088	3.79424	0.000148097	0.0152516	1.13817	164.333	206.158
chr5_150514690_150515940_plus	102.296	0.186499	0.0507702	3.67339	0.000239351	0.0197032	1.138	94.794	123.596
chr19_5154300_5155690_plus	124.539	0.186187	0.0347933	5.35124	8.74e-08	0.000728673	1.13775	110.146	141.222
chr14_68915330_68915540_minus	50.3158	0.185338	0.0376256	4.92583	8.4e-07	0.00210213	1.13708	46.4907	57.9468
chr12_10228410_10229760_plus	154.15	0.185286	0.0371556	4.98675	6.14e-07	0.00208226	1.13704	143.544	169.517
chr7_131121800_131122290_plus	42.2297	0.185281	0.0460868	4.02025	5.81e-05	0.0102453	1.13704	38.1019	45.8037
chr5_140272680_140273080_plus	32.594	0.185114	0.050659	3.65412	0.000258068	0.0203727	1.13691	30.4167	36.6385
chr5_172775050_172775580_minus	248.465	0.184708	0.0568825	3.24719	0.0011655	0.0425188	1.13659	213.231	246.391
chr1_21337730_21337840_minus	20.1232	0.184154	0.0491859	3.74403	0.000181091	0.0168468	1.13615	17.9398	23.233
chr6_158657000_158657850_plus	81.8185	0.183996	0.0371232	4.95634	7.18e-07	0.00208226	1.13603	74.4074	93.2128
chr15_58506420_58506670_minus	48.1475	0.183946	0.0526908	3.49104	0.000481149	0.0266397	1.13599	44.2222	51.3303
chr9_91415450_91415620_minus	37.9418	0.183669	0.0473477	3.87915	0.00010482	0.0134519	1.13577	33.8264	40.0239
chrX_17549620_17550620_plus	73.9937	0.183418	0.0503217	3.6449	0.000267497	0.0207248	1.13557	71.1366	86.9817
chr22_21830090_21830220_plus	9.37001	0.182137	0.0546842	3.33071	0.000866245	0.0355373	1.13456	8.58333	10.1358
chr10_6410550_6411800_plus	81.9851	0.181971	0.0483689	3.76215	0.000168457	0.0161519	1.13443	78.338	95.7651
chr1_248806950_248807420_plus	40.3658	0.181479	0.0547754	3.31314	0.000922547	0.0369388	1.13405	36.5949	45.0881
chr10_6316950_6319620_plus	228.751	0.181038	0.0415397	4.3582	1.31e-05	0.00555715	1.1337	217.88	263.525
chr17_41498540_41499290_plus	177.941	0.180332	0.0541964	3.32738	0.000876659	0.0356722	1.13314	153.759	178.178
chr3_52226670_52226780_minus	20.7306	0.180097	0.0458676	3.92646	8.62e-05	0.0124697	1.13296	18.2153	23.0404
chr1_21317450_21317640_minus	31.6131	0.179998	0.0520738	3.4566	0.000547037	0.0281788	1.13288	28.7384	38.0312
chr5_89436040_89436920_plus	76.1715	0.178674	0.0502957	3.55248	0.000381622	0.0236389	1.13184	69.0926	80.2862
chr2_70043780_70044300_plus	153.679	0.178619	0.0542689	3.29138	0.000996973	0.0389467	1.1318	134.928	151.356
chr10_6289390_6292200_plus	211.592	0.178528	0.0452939	3.94155	8.1e-05	0.0122043	1.13173	202.431	248.64
chr16_84598300_84598780_plus	30.8747	0.1785	0.0507026	3.52054	0.000430669	0.02524	1.13171	27.2106	35.7486
chr20_47727890_47728420_plus	87.3196	0.178466	0.0529335	3.37152	0.000747548	0.0328258	1.13168	78.1412	89.7083
chr12_31950400_31950940_minus	96.8322	0.178421	0.039242	4.54669	5.45e-06	0.00412293	1.13164	91.6944	111.077
chr11_46127130_46127610_plus	36.3146	0.178273	0.0472354	3.77414	0.00016056	0.0158116	1.13153	33.0278	37.8477
chr20_47739180_47739380_minus	34.105	0.178257	0.0455293	3.91522	9.03e-05	0.0127703	1.13152	31.1968	39.8661
chr7_112448100_112449200_plus	111.524	0.1782	0.0479544	3.71603	0.000202376	0.0178956	1.13147	103.4	123.415
chr10_97517030_97517490_plus	38.2775	0.178146	0.0512616	3.47524	0.000510404	0.0273509	1.13143	34.6273	43.956
chr15_69725490_69725770_plus	20.2032	0.177974	0.0547232	3.25226	0.00114492	0.0424499	1.13129	18.4954	21.4294
chr10_6375660_6387680_plus	2011.03	0.177591	0.0455928	3.89516	9.81e-05	0.0133468	1.13099	1941.06	2357.9
chr11_72741170_72741280_minus	25.263	0.177551	0.0392757	4.52063	6.17e-06	0.00417002	1.13096	22.6157	29.244
chr11_74450650_74450850_minus	40.1886	0.176505	0.0380141	4.64313	3.43e-06	0.00373377	1.13014	37.6065	43.0147
chr17_77384530_77385290_plus	50.4628	0.175939	0.043973	4.00107	6.31e-05	0.0106193	1.1297	44.8958	60.6183
chr22_42418830_42420170_minus	306.476	0.175573	0.0506942	3.46338	0.000533432	0.0280161	1.12941	264.502	371.778
chr10_6388090_6402160_plus	1765.81	0.175489	0.0461516	3.80244	0.000143275	0.0152282	1.12935	1711.02	2069.78
chr12_47889300_47889590_plus	24.5307	0.175261	0.0524381	3.34224	0.000831056	0.0347198	1.12917	22.1829	24.978
chr1_248805280_248806370_plus	84.1506	0.174907	0.0480396	3.64089	0.000271701	0.0208083	1.12889	76.4699	93.8606
chr7_102872940_102873990_minus	237.506	0.173984	0.0480034	3.6244	0.000289628	0.0213804	1.12817	226.532	272.851
chr6_11358660_11359360_plus	66.0876	0.173975	0.0425654	4.08724	4.37e-05	0.00868896	1.12816	61.2407	71.2826
chr15_69723160_69724490_plus	237.589	0.173888	0.0454595	3.82512	0.000130711	0.0147344	1.12809	215.831	246.475
chr20_1819870_1820490_minus	107.611	0.1736	0.0422915	4.10484	4.05e-05	0.00846283	1.12787	98.9236	124.637
chr20_1857520_1858170_minus	122.251	0.172981	0.0472703	3.65941	0.0002528	0.0202767	1.12739	115.438	146.479
chr11_126419590_126420640_plus	89.4394	0.17297	0.0395602	4.37232	1.23e-05	0.00555715	1.12738	82.4398	100.73
chr16_66207010_66207400_minus	78.0792	0.172577	0.040887	4.22084	2.43e-05	0.00724916	1.12707	72.3356	85.6073
chr10_104349680_104350020_plus	33.5272	0.172389	0.0474919	3.62986	0.000283578	0.0211441	1.12692	31.2662	36.1835
chr4_184750860_184752860_minus	488.905	0.172089	0.0400917	4.29238	1.77e-05	0.00629196	1.12669	465.285	561.677
chr22_42425040_42428280_minus	779.944	0.171938	0.0478909	3.59021	0.000330413	0.0228286	1.12657	680.345	944.91
chr15_69763780_69764340_plus	48.2529	0.17135	0.0495456	3.45843	0.000543334	0.0281391	1.12611	46.2986	55.0917
chr16_84598900_84600460_plus	133.267	0.171098	0.0398812	4.2902	1.79e-05	0.00629196	1.12592	116.252	149.817
chr12_10242100_10243130_plus	84.9713	0.170482	0.0405044	4.20898	2.57e-05	0.0073044	1.12543	79.5	95.1761
chr5_140222320_140224250_plus	178.245	0.170346	0.0432873	3.93523	8.31e-05	0.0123238	1.12533	168.259	206.884
chr6_30497480_30497870_plus	36.2002	0.169691	0.0448048	3.78735	0.000152263	0.0153027	1.12482	32.7593	37.9358
chr2_109215670_109216490_plus	59.0614	0.169365	0.0497681	3.40309	0.00066629	0.0312831	1.12456	56.6157	67.7193
chr21_37829250_37833740_plus	1111.46	0.169191	0.042649	3.96706	7.28e-05	0.0115982	1.12443	1035.28	1235.93
chr10_6265460_6267680_plus	244.373	0.168902	0.0441081	3.82926	0.000128527	0.0146129	1.1242	234.363	283.417
chr17_76252480_76253230_plus	86.2982	0.16815	0.0506808	3.31783	0.000907189	0.0366217	1.12362	76.9792	86.8239
chr5_160296290_160297650_minus	311.055	0.1677	0.0459707	3.64798	0.000264313	0.0206057	1.12327	296.444	367.905
chr5_140284740_140285230_plus	36.7037	0.167485	0.0500749	3.34469	0.000823736	0.0345293	1.1231	33.6319	40.145
chr14_50939420_50939750_minus	83.9433	0.167043	0.0471208	3.545	0.000392615	0.0239639	1.12275	75.9421	90.2789
chr1_59550240_59550630_plus	31.4911	0.166075	0.0437607	3.79507	0.000147602	0.0152516	1.122	28.6644	33.0954
chr20_1800130_1800390_minus	40.2283	0.165652	0.0452594	3.66006	0.000252157	0.0202767	1.12167	39.5463	46.4037
chr4_83549030_83549390_plus	26.4002	0.165609	0.043572	3.80082	0.000144219	0.0152282	1.12164	24.706	30.4404
chr5_140250960_140254430_plus	580.872	0.164875	0.0416748	3.95623	7.61e-05	0.0119093	1.12107	560.083	669.281
chr20_713430_716990_plus	450.968	0.164717	0.0429096	3.8387	0.000123688	0.0141986	1.12095	430.326	517.037
chr3_71759450_71759720_minus	48.2793	0.164312	0.0499777	3.28771	0.00101005	0.0392493	1.12063	44.6667	54.1798
chr16_66222400_66223260_minus	196.126	0.164312	0.0407152	4.03563	5.45e-05	0.00999691	1.12063	181.993	216.921
chr1_10385720_10385940_plus	22.615	0.163859	0.0469886	3.48721	0.000488088	0.0267325	1.12028	20.7176	24.844
chr14_75284260_75285490_plus	532.514	0.163385	0.0502991	3.24826	0.00116113	0.0425188	1.11991	473.889	530.297
chr19_3165620_3166750_plus	311.748	0.162885	0.0491886	3.31144	0.000928159	0.0370449	1.11952	277.572	312.539
chr5_140184150_140186640_plus	260.085	0.162072	0.0389752	4.15834	3.21e-05	0.00818612	1.11889	239.347	284.007
chr10_6247940_6258940_plus	1382.17	0.161429	0.0446261	3.61736	0.00029762	0.0217141	1.11839	1333.26	1615.58
chr15_63918370_63918610_minus	37.1382	0.161316	0.042289	3.8146	0.000136404	0.0152282	1.11831	35.4838	41.6826
chr1_21340880_21341570_minus	118.652	0.160691	0.0379808	4.23085	2.33e-05	0.00701942	1.11782	106.812	137.345
chr19_51158910_51159180_plus	20.7699	0.160224	0.0487653	3.28562	0.00101758	0.0394583	1.11746	19.5162	22.5431
chr15_69749690_69750690_minus	218.882	0.159654	0.0499732	3.1948	0.00139929	0.0467519	1.11702	202.613	229.429
chr16_66225130_66225620_minus	82.4902	0.159438	0.0440212	3.62185	0.000292503	0.0215291	1.11685	76.169	89.9505
chr20_1858280_1861550_minus	666.007	0.159417	0.0408946	3.89824	9.69e-05	0.0133468	1.11684	641.12	778.185
chr7_23600510_23600650_plus	10.3116	0.159185	0.0425338	3.74255	0.000182163	0.0168838	1.11666	9.59722	11.7945
chr16_11613470_11613780_minus	70.3099	0.158927	0.0492977	3.22383	0.0012649	0.0445049	1.11646	64.1389	72.3193
chr19_904200_904400_minus	39.8414	0.158913	0.048745	3.2601	0.00111374	0.0418487	1.11645	36.8403	43.9541
chr19_38698150_38699000_plus	65.2367	0.158567	0.0441996	3.58751	0.00033385	0.0228583	1.11618	58.9352	77.3138
chr14_64761230_64761800_plus	46.2926	0.15804	0.0462371	3.41803	0.000630767	0.0303307	1.11577	41.5718	50.8239
chr4_184792060_184793540_minus	399.591	0.157991	0.0486978	3.24432	0.0011773	0.0427434	1.11573	382.164	467.541
chr2_191739600_191740450_plus	88.4684	0.157986	0.0479981	3.29149	0.000996567	0.0389467	1.11573	80.206	92.2734
chr5_89441390_89441850_plus	35.9439	0.157901	0.0493458	3.19988	0.00137487	0.0462447	1.11566	33.8287	38.556
chr5_160272510_160272740_minus	40.5535	0.157568	0.045886	3.4339	0.000594961	0.029483	1.11541	39.3171	47.2257
chr1_33346490_33347170_minus	129.718	0.156527	0.0491323	3.18584	0.00144337	0.0475893	1.1146	124.285	152.44
chr1_51665650_51665890_plus	18.6849	0.156516	0.041147	3.80381	0.000142486	0.0152282	1.11459	17.4676	20.6716
chr15_69757870_69763640_plus	722.195	0.155935	0.038107	4.09205	4.28e-05	0.00862928	1.11414	670.201	777.233
chr11_188460_189350_minus	457.465	0.155364	0.0386197	4.02291	5.75e-05	0.0102453	1.1137	424.081	480.365
chr3_155185750_155191590_plus	782.842	0.155354	0.0419634	3.70214	0.000213788	0.0185766	1.1137	717.667	860.69
chr20_48749880_48750200_minus	71.7636	0.155299	0.0465613	3.33536	0.000851899	0.0352779	1.11365	67.5972	86.3596
chr4_139031400_139031570_minus	25.8203	0.155264	0.0368078	4.21823	2.46e-05	0.00724916	1.11363	24.8519	28.6349
chr2_71471140_71477980_plus	759.703	0.155181	0.0414235	3.74622	0.000179519	0.0168257	1.11356	716.984	864.756
chr11_2826640_2829460_plus	235.159	0.154941	0.0362097	4.27899	1.88e-05	0.00641856	1.11338	211.914	280.246
chr15_101185610_101185900_minus	58.4283	0.154552	0.0411498	3.75584	0.000172759	0.0164384	1.11308	55.375	69.1761
chr15_79961850_79963360_minus	420.865	0.154416	0.0361742	4.26869	1.97e-05	0.00641856	1.11297	391.755	451.877
chr12_98637970_98638140_minus	28.4856	0.154188	0.0382784	4.02806	5.62e-05	0.010194	1.11279	26.9537	31.5358
chr19_18488580_18490710_minus	367.352	0.154105	0.0424828	3.62747	0.000286207	0.0211903	1.11273	329.35	449.45
chr5_89450450_89450810_plus	37.1542	0.154049	0.0474469	3.24676	0.00116725	0.0425188	1.11269	34.9838	39.1908
chr5_100800610_100801390_minus	156.147	0.153858	0.0404553	3.80316	0.000142864	0.0152282	1.11254	145.414	162.358
chr10_6281350_6284510_plus	287.135	0.153263	0.0474033	3.23317	0.00122424	0.0440905	1.11208	279.762	336.44
chr19_14635730_14635980_minus	48.1848	0.153216	0.0449761	3.40661	0.00065774	0.0311925	1.11205	44.0093	50.6459
chr17_3911050_3911510_minus	78.0494	0.15254	0.0480597	3.17396	0.00150374	0.0488083	1.11152	70.0185	88.2073
chr15_79963530_79964660_minus	280.16	0.152502	0.0389215	3.91819	8.92e-05	0.0126855	1.1115	259.498	299.167
chr10_45472340_45475290_plus	380.284	0.152226	0.0400686	3.79914	0.000145202	0.0152516	1.11128	360.356	428.27
chr10_132625930_132628850_plus	275.51	0.152154	0.03355	4.53516	5.76e-06	0.00412293	1.11123	254.308	329.459
chr17_3911970_3913120_minus	242.844	0.152063	0.0447375	3.39901	0.000676314	0.0314145	1.11116	219.192	271.36
chr5_140216220_140221140_plus	480.277	0.151834	0.0407002	3.73056	0.000191054	0.0173943	1.11098	460.271	552.349
chr11_121696210_121698340_plus	200.349	0.151696	0.0466142	3.25428	0.00113679	0.042425	1.11087	197.225	230.121
chr4_83552520_83553000_plus	39.8327	0.15059	0.0436553	3.44952	0.000561584	0.0285064	1.11002	37.7894	45.7193
chr19_50023390_50023800_minus	77.8797	0.150578	0.0427211	3.52467	0.000424014	0.0250258	1.11001	71.2616	78.4881
chr22_21831240_21831770_plus	33.0657	0.150265	0.0416288	3.60963	0.00030663	0.0218866	1.10977	31.3287	36.6954
chrX_17689530_17691110_plus	129.922	0.150179	0.0362899	4.1383	3.5e-05	0.00838688	1.10971	122.748	140.429
chr15_69766220_69775140_plus	1454.18	0.149589	0.0417805	3.58036	0.000343121	0.0231729	1.10925	1357.5	1512.28
chr21_37822460_37829140_plus	1864.28	0.149506	0.040174	3.72145	0.00019808	0.0176404	1.10919	1776.91	2075.45
chr10_104321100_104321240_minus	23.3621	0.149472	0.044283	3.37538	0.000737128	0.0327068	1.10916	21.6505	26.389
chr20_49295160_49296920_plus	133.753	0.148483	0.0395023	3.75885	0.000170695	0.0163039	1.1084	127.042	149.657
chr4_40765270_40772190_plus	766.147	0.148384	0.0365544	4.05926	4.92e-05	0.00926256	1.10833	723.97	872.677
chr2_174523480_174524050_minus	124.282	0.148206	0.042615	3.47779	0.000505567	0.0272082	1.10819	120.81	145.69
chr17_21249740_21251320_minus	394.356	0.148167	0.0408182	3.62992	0.000283505	0.0211441	1.10816	347.623	427.121
chr6_24942250_24945730_plus	627.067	0.148143	0.0417801	3.54579	0.000391436	0.0239503	1.10814	578.683	666.96
chr17_78995820_78995950_minus	24.0016	0.14762	0.0391444	3.77117	0.000162482	0.0158116	1.10774	22.2894	26.9725
chr6_158678550_158679060_plus	38.1168	0.14733	0.0357685	4.119	3.81e-05	0.00838688	1.10752	36.2153	43.5193
chr8_122858920_122859780_plus	61.7656	0.147293	0.0429442	3.42988	0.000603856	0.0297759	1.10749	58.6505	74.5339
chr5_10452740_10455140_plus	269.001	0.147224	0.0387948	3.79495	0.000147674	0.0152516	1.10744	255.977	312.883
chr12_7917220_7917660_minus	96.8379	0.146801	0.0429019	3.42179	0.000622105	0.0300564	1.10711	88.6667	100.376
chr16_3821940_3822230_minus	65.8824	0.146767	0.0436522	3.3622	0.000773246	0.0333535	1.10709	63.4838	76.033
chr12_122863670_122863780_minus	19.9351	0.14659	0.038803	3.77779	0.000158225	0.0156505	1.10695	19.0648	22.4807
chr5_140213480_140215520_plus	240.467	0.145613	0.0408402	3.56544	0.000363252	0.0232904	1.1062	231.391	277.004
chr10_97323080_97323810_minus	155.835	0.145158	0.0389297	3.72871	0.000192465	0.0173943	1.10585	144.514	167.266
chr16_66204910_66205190_minus	47.1499	0.14479	0.04385	3.30193	0.000960225	0.0378419	1.10557	45.8032	53.2844
chr20_1852720_1854010_minus	285.807	0.144554	0.04233	3.41492	0.000638017	0.0304702	1.10539	276.521	334.943
chr4_83558340_83559070_plus	66.2134	0.144291	0.0403671	3.57446	0.00035095	0.0231729	1.10519	63.2431	74.4679
chr14_68913200_68913730_minus	96.2992	0.143945	0.0322647	4.46136	8.14e-06	0.00505572	1.10492	91.5	108.747
chr14_68929390_68930160_minus	356.982	0.143884	0.0430909	3.33907	0.000840591	0.0349432	1.10488	326.479	364.459
chr9_112450900_112452130_plus	118.238	0.143409	0.0297014	4.82835	1.38e-06	0.00246416	1.10451	112.535	131.286
chr2_70500130_70501080_minus	202.65	0.143372	0.0369931	3.87564	0.000106346	0.0135366	1.10448	193.44	220.705
chr2_174524230_174525920_minus	370.135	0.143086	0.0345552	4.1408	3.46e-05	0.00838688	1.10426	358.157	422.774
chr20_47750300_47751010_minus	158.028	0.142337	0.0377612	3.76939	0.000163645	0.0158116	1.10369	144.333	178.712
chr3_39149580_39149980_minus	75.077	0.142262	0.0405246	3.51051	0.000447243	0.025908	1.10363	67.6505	86.4624
chr20_1855450_1857340_minus	370.369	0.141905	0.0423607	3.34993	0.000808334	0.0341111	1.10336	358.884	436.585
chr19_50004830_50005040_minus	44.9475	0.141653	0.0334654	4.23283	2.31e-05	0.00701942	1.10317	41.5972	49.2092
chr14_68914090_68914230_minus	25.6032	0.141331	0.0370265	3.81702	0.000135074	0.015158	1.10292	24.5394	28.9193
chr21_42302620_42304300_plus	190.535	0.141082	0.0417661	3.37791	0.000730399	0.0327068	1.10273	180.567	206.088
chr17_14333410_14333850_plus	33.3559	0.140858	0.0436798	3.22478	0.0012607	0.0445049	1.10256	32.1551	38.0587
chr7_5354550_5355080_minus	99.7517	0.140289	0.0369926	3.79235	0.000149227	0.0153027	1.10213	94.0764	116.147
chr15_79903120_79903460_minus	85.8596	0.140119	0.0367855	3.80908	0.000139486	0.0152282	1.102	81.7037	95.5872
chr5_140181950_140184040_plus	224.689	0.140108	0.0367705	3.81035	0.000138771	0.0152282	1.10199	211.819	247.905
chr11_129824460_129826250_plus	242.354	0.139893	0.0391997	3.56872	0.000358727	0.0232213	1.10182	234.613	263.275
chr15_63945760_63946070_minus	75.3241	0.139741	0.041901	3.33504	0.000852873	0.0352779	1.10171	70.9583	86.7688
chr9_91412820_91414280_minus	378.371	0.139079	0.0398543	3.48968	0.000483596	0.0266397	1.1012	344.47	398.921
chr22_42886490_42887990_minus	359.733	0.139	0.0314443	4.42052	9.85e-06	0.00505572	1.10114	331.245	402.848
chr11_121698830_121709560_plus	1142.85	0.13885	0.042554	3.26292	0.00110269	0.0416514	1.10103	1120.71	1299.7
chr12_98636240_98636940_minus	146.265	0.138556	0.0334844	4.13793	3.5e-05	0.00838688	1.1008	137.468	159.567
chr1_149881750_149883230_minus	494.315	0.13845	0.0408394	3.39011	0.000698655	0.0318467	1.10072	463.171	516.761
chr4_40441400_40442150_minus	212.502	0.138281	0.033895	4.0797	4.51e-05	0.00888575	1.10059	200.153	232.218
chr11_72740740_72740850_minus	21.8129	0.138188	0.0406024	3.40345	0.000665415	0.0312831	1.10052	19.9074	25.2972
chr1_59571840_59573200_plus	142.306	0.137426	0.0427738	3.21285	0.00131426	0.0451422	1.09994	132.942	147.851
chr11_114251460_114255260_plus	549.674	0.137265	0.0410857	3.34095	0.00083493	0.0348235	1.09982	504.671	651.941
chr1_115056290_115056600_minus	98.1259	0.136942	0.0421499	3.24893	0.00115841	0.0425188	1.09957	93.1412	104.121
chr3_112520540_112520800_minus	51.6855	0.136663	0.0377789	3.61743	0.000297538	0.0217141	1.09936	49.0602	54.4367
chr18_62950310_62951060_plus	66.9214	0.136631	0.0375334	3.64025	0.000272369	0.0208083	1.09934	63.1574	73.1321
chr3_155119700_155133620_plus	2879.97	0.136577	0.0393103	3.47433	0.000512133	0.0273652	1.09929	2760.58	3252.48
chr6_41694020_41695500_minus	398.454	0.13647	0.0358492	3.80677	0.000140795	0.0152282	1.09921	361.625	478.246
chr12_64730160_64731200_plus	83.5984	0.136369	0.0353753	3.85492	0.000115767	0.0138615	1.09914	79.3102	90.7651
chr18_62953220_62954010_plus	72.3357	0.13631	0.0377677	3.60917	0.000307176	0.0218866	1.09909	68.7986	78.9835
chr9_114393520_114393650_minus	25.6529	0.135726	0.0350898	3.86796	0.000109752	0.0135967	1.09865	24.5255	28.6404
chr3_72081680_72081940_minus	50.0016	0.13541	0.039543	3.42437	0.00061622	0.0300018	1.0984	46.4954	55.989
chr20_1850950_1852510_minus	346.189	0.135171	0.0420377	3.21547	0.00130229	0.0448897	1.09822	337.498	404.624
chr1_234964860_234965690_minus	154.014	0.135164	0.0397387	3.40132	0.000670625	0.0314145	1.09822	147.794	173.596
chr18_77000510_77001090_minus	99.9355	0.13478	0.0308013	4.37578	1.21e-05	0.00555715	1.09793	95.0972	111.73
chr3_48515450_48515720_minus	43.2189	0.13465	0.0420502	3.20212	0.00136418	0.0460049	1.09783	40.713	48.4495
chr15_101185320_101185500_minus	33.4589	0.13455	0.04137	3.25234	0.00114457	0.0424499	1.09775	31.6319	38.8147
chr11_72745840_72746360_minus	112.532	0.134349	0.0330165	4.06915	4.72e-05	0.00904533	1.0976	103.838	125.305
chr16_66199170_66200310_minus	262.228	0.133897	0.0387193	3.45815	0.000543906	0.0281391	1.09725	255.12	293.78
chr6_31396180_31396300_minus	21.2804	0.133856	0.0404147	3.31207	0.000926095	0.0370216	1.09722	20.2917	22.7651
chr5_89447000_89448430_plus	122.826	0.133568	0.0422208	3.16357	0.00155847	0.0498094	1.097	115.352	129.044
chr1_161009070_161009200_minus	25.6349	0.133349	0.0366966	3.63382	0.000279253	0.0211127	1.09684	24.6435	28.4312
chr14_73328610_73331380_minus	655.571	0.132789	0.0262167	5.06507	4.08e-07	0.00170277	1.09641	630.641	740.701
chr8_19414820_19415210_minus	83.8895	0.132562	0.0368853	3.59389	0.000325775	0.022709	1.09624	80.2037	91.2128
chr2_70509170_70510080_minus	228.272	0.131834	0.037486	3.51689	0.000436633	0.025411	1.09569	224.016	258.086
chr11_118244930_118248200_minus	1065.59	0.131794	0.0298515	4.41499	1.01e-05	0.00505572	1.09566	1006.4	1164.75
chr10_73850730_73851180_minus	84.3966	0.13143	0.0316025	4.15884	3.2e-05	0.00818612	1.09538	79.2176	92.9872
chr14_94412960_94423230_plus	1518.73	0.131201	0.0381905	3.43545	0.000591571	0.0294315	1.09521	1484.18	1680.74
chr8_61708710_61708830_minus	24.964	0.131201	0.0407127	3.2226	0.00127033	0.0445049	1.0952	24.0139	27.1358
chr8_19415340_19415560_minus	34.7135	0.13119	0.0378483	3.46621	0.000527844	0.0278091	1.0952	33.6412	38.7633
chr15_63944580_63945340_minus	156.68	0.131082	0.0385958	3.39628	0.000683074	0.0314504	1.09511	147.104	182.261
chr2_40437200_40437590_minus	68.7369	0.130412	0.0392774	3.32027	0.000899308	0.0364752	1.09461	66.5162	79.0092
chr10_30853410_30853690_minus	49.2719	0.129433	0.0336587	3.84547	0.00012032	0.0140047	1.09386	47.7338	55.0532
chr11_9161960_9162110_minus	31.6724	0.129402	0.0384677	3.3639	0.000768483	0.0332721	1.09384	29.6852	34.1101
chr20_47748670_47749030_minus	68.3299	0.129322	0.0401832	3.21831	0.0012895	0.0445715	1.09378	63.9306	78.2275
chr15_63942470_63943050_minus	109	0.129233	0.0402259	3.21267	0.00131506	0.0451422	1.09371	102.201	126.042
chr5_91182130_91183540_minus	261.332	0.129133	0.0365854	3.52964	0.000416128	0.0247943	1.09364	253.007	288.204
chr6_134217410_134217980_minus	111.031	0.128938	0.0380845	3.38557	0.000710298	0.0322014	1.09349	106.713	121.527
chr1_21330380_21331170_minus	150.394	0.128577	0.0356014	3.61156	0.000304358	0.0218866	1.09321	139.998	173.033
chr10_48799320_48799960_plus	56.0342	0.128134	0.0393451	3.25666	0.00112731	0.0422319	1.09288	52.831	61.3156
chr8_28760400_28760860_plus	39.4465	0.128006	0.0376126	3.40327	0.000665843	0.0312831	1.09278	37.6898	44.2073
chrX_17712860_17714440_plus	150.771	0.127993	0.0358535	3.56988	0.000357144	0.0232213	1.09277	146.718	166.925
chr11_72742720_72743340_minus	145.044	0.127721	0.0295182	4.32686	1.51e-05	0.00591068	1.09257	135.488	163.36
chr20_60289270_60300930_plus	2578.11	0.12769	0.0332331	3.84227	0.000121901	0.0140579	1.09254	2469.18	3035.43
chr20_47748220_47748540_minus	67.4834	0.127531	0.0393849	3.23806	0.00120346	0.043521	1.09242	63.2222	76.9615
chr1_21313000_21315320_minus	467.285	0.127456	0.0345656	3.68735	0.000226603	0.0189657	1.09237	443.542	555.277
chr14_73326300_73327020_minus	133.426	0.127345	0.0339208	3.75419	0.000173905	0.0164411	1.09228	129.331	152.376
chr20_60110790_60111780_plus	84.2364	0.126859	0.0353404	3.58964	0.00033114	0.0228286	1.09191	79.5278	95.6165
chr7_127983330_127986100_minus	814.599	0.126611	0.0378077	3.34881	0.000811584	0.0341343	1.09173	782.847	890.727
chr7_42906090_42906310_minus	39.9042	0.126592	0.0381374	3.31938	0.00090218	0.0365324	1.09171	37.0116	41.9688
chr14_75460320_75460730_plus	95.821	0.1264	0.0339607	3.72196	0.000197682	0.0176404	1.09157	90.6921	104.598
chr2_70501230_70502210_minus	218.357	0.125345	0.0351688	3.56409	0.000365115	0.0232904	1.09077	211.289	243.119
chr1_21341730_21343530_minus	351.617	0.125075	0.0350384	3.56966	0.00035744	0.0232213	1.09056	325.968	402.29
chr5_91177110_91178380_minus	344.913	0.124859	0.0377889	3.30413	0.000952727	0.0377247	1.0904	338.37	388.714
chr11_126418170_126419370_plus	110.732	0.124783	0.0357136	3.49399	0.000475853	0.0265356	1.09034	104.975	122.82
chr11_72744260_72744590_minus	60.3261	0.124772	0.0329701	3.7844	0.000154083	0.0154237	1.09034	55.9468	67.8202
chr22_42898390_42898880_minus	99.492	0.124733	0.03529	3.53451	0.000408529	0.0245519	1.09031	93.9213	110.409
chr1_21315880_21316270_minus	74.2693	0.124399	0.0387259	3.21229	0.00131684	0.0451422	1.09005	70.1458	87.8367
chr22_21823450_21825280_plus	184.699	0.124124	0.0363683	3.41298	0.000642559	0.0306287	1.08985	173.826	198.383
chr19_56112210_56112760_minus	109.836	0.124019	0.0315592	3.92973	8.5e-05	0.0123849	1.08977	100.56	122.295
chr17_45426450_45427090_minus	143.149	0.124009	0.0386574	3.2079	0.00133708	0.0454007	1.08976	129.63	164.393
chr4_37620360_37620500_minus	34.2534	0.123881	0.0388561	3.1882	0.00143159	0.0474512	1.08966	32.8264	38.2165
chr6_30809390_30809920_minus	127.402	0.123871	0.0366902	3.37614	0.000735105	0.0327068	1.08965	121.796	137.185
chr20_32471530_32472220_minus	110.191	0.123845	0.0344465	3.5953	0.000324023	0.022701	1.08964	101.586	127.108
chr7_98199180_98199850_plus	60.7831	0.123772	0.0318566	3.88529	0.000102208	0.0133899	1.08958	58.6111	68.8477
chr6_136716170_136716330_minus	29.6758	0.123458	0.0325727	3.79022	0.000150514	0.0153027	1.08934	29.169	33.8147
chr6_110713740_110715190_minus	288.143	0.123394	0.0343635	3.59083	0.000329623	0.0228286	1.08929	287.502	338.114
chr20_47695190_47696340_minus	190.141	0.123377	0.0356623	3.4596	0.000540969	0.0281391	1.08928	179.975	220.407
chr1_51664270_51664510_plus	15.1091	0.123323	0.0379011	3.25382	0.00113864	0.042425	1.08924	14.7292	16.9798
chr11_72746470_72746840_minus	83.9511	0.123049	0.0316764	3.88456	0.000102515	0.0133899	1.08903	78.2824	93.6642
chr14_91207080_91208290_plus	96.7164	0.121878	0.0378253	3.22213	0.00127242	0.0445049	1.08815	91.0162	107.956
chr17_44114490_44115020_minus	98.6305	0.121872	0.0360246	3.38302	0.000716921	0.0323844	1.08815	92.1412	112.561
chr15_42488160_42488880_minus	175.169	0.121421	0.0329054	3.69001	0.000224244	0.0188869	1.08781	164.264	183.167
chr5_180046920_180047050_minus	20.6476	0.121415	0.0382401	3.17507	0.00149799	0.048748	1.0878	19.8889	23.345
chr11_10284150_10284360_minus	42.1877	0.121194	0.0338382	3.58159	0.000341516	0.0231729	1.08763	39.7083	47.2624
chr22_21748360_21748840_minus	93.327	0.121091	0.0323866	3.73892	0.000184816	0.0170038	1.08756	89.8588	101.648
chr20_20441140_20441380_minus	34.8694	0.120903	0.0350078	3.45361	0.000553138	0.0282495	1.08742	34.5926	39.8018
chr5_100572780_100575170_plus	276.012	0.120854	0.0258249	4.67973	2.87e-06	0.00373377	1.08738	269.007	305.334
chr1_27258570_27259110_plus	51.8659	0.120828	0.0356594	3.38838	0.00070308	0.0319901	1.08736	50.1875	57.5138
chr12_98642130_98643600_minus	337.453	0.120588	0.0329095	3.66422	0.000248096	0.0201512	1.08718	318.606	361.662
chr1_12145230_12150180_plus	447.789	0.120421	0.033005	3.64857	0.000263709	0.0206057	1.08705	419.875	484.62
chr17_68437040_68437890_plus	66.892	0.120401	0.0304855	3.94944	7.83e-05	0.0120262	1.08704	65.588	74.233
chr11_2820130_2825510_plus	581.99	0.119887	0.0308472	3.88649	0.000101703	0.0133899	1.08665	539.988	684.901
chr11_59756210_59769850_plus	6436.72	0.119877	0.0277813	4.31501	1.6e-05	0.00591068	1.08664	6172.75	7139.64
chr8_89888970_89889250_minus	71.6054	0.119674	0.0262887	4.55228	5.31e-06	0.00412293	1.08649	69.4537	77.8183
chr12_98641690_98642000_minus	80.3318	0.119605	0.0345809	3.4587	0.000542798	0.0281391	1.08644	76.1574	87.0881
chr7_130985380_130985670_minus	58.3404	0.119021	0.0354608	3.35641	0.000789615	0.0337082	1.086	57.4815	68.4734
chr20_20608110_20608230_minus	22.8466	0.118572	0.0329309	3.60063	0.000317444	0.0224031	1.08566	22.088	25.6477
chr2_201034280_201042450_minus	3324.45	0.117487	0.0286682	4.09817	4.16e-05	0.00854193	1.08484	3181.22	3618.3
chr10_79189340_79196080_plus	855.289	0.116969	0.0353738	3.30666	0.000944165	0.0375043	1.08445	789.479	1012.4
chr4_139033580_139037400_minus	1240.55	0.116941	0.0212816	5.49494	3.91e-08	0.000728673	1.08443	1202.95	1356.77
chr11_14892820_14896380_plus	295.242	0.115009	0.0310004	3.70992	0.000207323	0.0181408	1.08298	281.556	318.156
chr17_44113310_44114070_minus	134.863	0.114693	0.0332081	3.45377	0.000552805	0.0282495	1.08274	124.961	155.02
chrX_120452800_120454340_minus	347.485	0.114154	0.0272884	4.18325	2.87e-05	0.00774954	1.08234	331.102	371.273
chr8_61696460_61697370_minus	189.236	0.114098	0.0335693	3.39888	0.00067662	0.0314145	1.0823	184.794	208.582
chr12_49200000_49205000_plus	532.401	0.114087	0.0311866	3.6582	0.000253993	0.0203072	1.08229	508.988	566.497
chr6_35852010_35853230_minus	237.5	0.113784	0.0339708	3.34947	0.000809669	0.0341111	1.08206	234.28	272.743
chr8_140545430_140546260_minus	136.38	0.113674	0.0327915	3.46657	0.000527144	0.0278091	1.08198	126.185	154.288
chr14_73369850_73370170_minus	61.647	0.113324	0.033564	3.37637	0.000734503	0.0327068	1.08172	59.7731	67.8477
chr1_59569550_59571650_plus	196.416	0.113217	0.0292435	3.87154	0.000108148	0.0135967	1.08164	190.095	210.272
chr20_20690640_20691100_minus	125.165	0.11257	0.0331766	3.39307	0.000691136	0.0316756	1.08115	122.616	138.15
chr4_83545800_83547140_plus	117.673	0.112478	0.0330191	3.40645	0.000658127	0.0311925	1.08108	112.354	130.42
chr17_64830410_64830840_minus	93.7298	0.112088	0.0306914	3.65211	0.000260096	0.0204682	1.08079	91.1528	106.506
chr4_184357830_184359140_minus	259.242	0.111908	0.0323607	3.45815	0.0005439	0.0281391	1.08066	253.84	284.24
chr11_12174260_12178670_plus	904.94	0.111833	0.0341228	3.27737	0.00104779	0.0399711	1.0806	876.387	1056.28
chr9_112446110_112448260_plus	267.285	0.11169	0.0271084	4.12011	3.79e-05	0.00838688	1.08049	259.174	297.494
chr8_141222370_141227140_minus	1637.01	0.111217	0.0323382	3.43919	0.000583468	0.0291715	1.08014	1571.29	1871.2
chr4_159307570_159310360_plus	431.823	0.111092	0.0286128	3.8826	0.000103343	0.0133899	1.08005	414.141	463.042
chr1_231404040_231408070_minus	1651.09	0.11068	0.027528	4.02064	5.8e-05	0.0102453	1.07974	1622.84	1873.52
chr6_17891840_17892300_minus	104.425	0.110611	0.0327817	3.37416	0.000740411	0.0327943	1.07969	99.6667	114.917
chr19_16363170_16367090_minus	856.277	0.11017	0.0307781	3.57949	0.000344259	0.0231729	1.07936	799.315	1003.5
chr6_110819340_110819980_plus	50.1464	0.10965	0.0320103	3.42547	0.000613742	0.0300018	1.07897	48.6991	55.7358
chr16_3852610_3853190_minus	119.918	0.109575	0.0232305	4.71688	2.39e-06	0.00332948	1.07891	115.032	135.294
chr17_82987470_82989020_minus	392.333	0.109467	0.0334569	3.27188	0.00106834	0.0405693	1.07883	379.81	453.879
chr1_33340930_33346150_minus	3949.94	0.109296	0.0338777	3.22619	0.0012545	0.0445049	1.0787	3802.15	4506.27
chr13_45184830_45185310_plus	31.2971	0.109228	0.0344304	3.17244	0.00151165	0.0489379	1.07865	31.5625	35.3706
chr1_116562330_116563030_minus	163.515	0.109208	0.0266692	4.0949	4.22e-05	0.00859279	1.07864	155.185	186.912
chr22_35315170_35316630_plus	146.046	0.109203	0.0310017	3.5225	0.000427497	0.025172	1.07863	137.912	166.031
chr11_116929520_116929640_minus	23.7804	0.10904	0.0312092	3.49385	0.000476103	0.0265356	1.07851	23.0741	26.2128
chr14_92691950_92696970_plus	793.254	0.108559	0.0319568	3.39706	0.000681134	0.0314504	1.07815	729.421	910.207
chr22_42895480_42897260_minus	500.948	0.108462	0.0266789	4.06546	4.79e-05	0.00908805	1.07808	485.097	566.739
chr11_78256430_78257040_minus	187.677	0.108371	0.033339	3.25058	0.0011517	0.0425188	1.07801	182.199	208.2
chr3_32478020_32478640_minus	128.81	0.108299	0.0279471	3.87514	0.000106562	0.0135366	1.07796	124.866	143.27
chr11_9208600_9208830_minus	43.8555	0.108104	0.0339702	3.18232	0.00146102	0.0478562	1.07781	42.5	48.4459
chr6_136553420_136554040_minus	160.628	0.108006	0.0297104	3.63531	0.000277652	0.0210553	1.07774	153.722	169.769
chr1_156496420_156498550_minus	674.303	0.107884	0.0294171	3.66741	0.00024502	0.020038	1.07765	615.359	767.187
chr11_72743450_72744110_minus	154.892	0.107211	0.0317063	3.38137	0.000721248	0.0325211	1.07714	145.06	174.308
chr2_96245750_96246290_minus	93.3692	0.107052	0.0323685	3.30731	0.00094197	0.0374766	1.07703	89.0347	103.793
chr10_29676630_29677300_minus	134.563	0.106953	0.0304735	3.5097	0.000448619	0.0259277	1.07695	131.833	153.483
chr1_151690170_151691410_plus	112.368	0.106868	0.0288824	3.7001	0.000215513	0.018619	1.07689	108.711	123.879
chr11_72746960_72749680_minus	592.29	0.106849	0.028902	3.69693	0.000218218	0.0187018	1.07687	559.609	654.857
chr11_72749950_72751680_minus	384.333	0.106695	0.0330006	3.23311	0.00122449	0.0440905	1.07676	356.299	413.035
chr2_239262470_239263240_minus	148.834	0.106588	0.0318005	3.35177	0.000802958	0.0340577	1.07668	142.201	166.877
chr16_69191990_69192670_plus	71.8664	0.106296	0.0279577	3.80204	0.000143507	0.0152282	1.07646	69.3287	79.9578
chr6_17864540_17865180_minus	114.54	0.106118	0.0328629	3.22911	0.00124174	0.0443922	1.07633	110.824	127.958
chr8_61708940_61710330_minus	307.83	0.106073	0.0325661	3.25717	0.00112529	0.0422196	1.07629	295.389	334.426
chr20_56429900_56436300_plus	1415.25	0.105806	0.0257306	4.11208	3.92e-05	0.00838688	1.0761	1383.27	1593.36
chr15_79903640_79905080_minus	436.311	0.10564	0.0311008	3.39671	0.000682024	0.0314504	1.07597	427.181	483.96
chr4_184362170_184362740_minus	136.277	0.105473	0.0328588	3.20989	0.00132787	0.0452617	1.07585	134.556	150.549
chr2_28038410_28039200_plus	68.9144	0.105127	0.0268812	3.91081	9.2e-05	0.0129325	1.07559	66.0926	77.2624
chr14_68918950_68920460_minus	331.31	0.104576	0.0303448	3.44626	0.000568403	0.0287359	1.07518	323.016	373.283
chr14_92697130_92699600_plus	332.373	0.104563	0.0299985	3.48561	0.000491012	0.026764	1.07517	310.91	362.866
chr11_78257150_78260870_minus	879.849	0.103866	0.0300494	3.4565	0.000547248	0.0281788	1.07465	857.164	995.382
chr13_25281190_25281320_minus	24.8448	0.10382	0.0314116	3.30516	0.000949212	0.0376451	1.07462	23.1528	27.5761
chr15_94410060_94415560_plus	3194.65	0.103806	0.0322906	3.21475	0.00130557	0.0449406	1.0746	3158.87	3698.61
chr16_67472920_67473530_minus	107.787	0.103762	0.0327844	3.16499	0.00155089	0.0496935	1.07457	102.03	118.261
chr6_158668330_158672590_plus	494.02	0.103469	0.0266517	3.88226	0.000103488	0.0133899	1.07435	477.882	555.872
chr11_3010500_3010740_minus	56.0095	0.102762	0.0324542	3.16637	0.00154354	0.0495218	1.07383	52.8657	61.8807
chr17_51050270_51050870_minus	152.874	0.102679	0.0291841	3.51832	0.000434291	0.0253336	1.07377	146.836	163.62
chr9_112302900_112303260_minus	64.1659	0.10217	0.0257309	3.97069	7.17e-05	0.0114963	1.07339	62.7014	72.6954
chr14_102388990_102399890_plus	1685.22	0.102069	0.03064	3.33124	0.000864594	0.0355279	1.07331	1639.99	1865.49
chr14_73327230_73327880_minus	139.153	0.101423	0.0304599	3.32971	0.000869351	0.0356064	1.07283	135.382	155.024
chr1_52746780_52747890_plus	85.5944	0.101194	0.0299651	3.37706	0.000732661	0.0327068	1.07266	82.2824	99.8734
chr7_134667250_134668060_plus	73.9652	0.100226	0.0291668	3.4363	0.000589712	0.0293975	1.07194	70.4398	80.0881
chr22_38268510_38269190_minus	123.544	0.0996778	0.0296308	3.36399	0.000768244	0.0332721	1.07153	117.833	135.141
chr5_95075540_95079600_minus	1174.91	0.0987208	0.0311643	3.16776	0.0015362	0.0494548	1.07082	1118.12	1251.81
chr13_32113070_32115580_plus	359.827	0.0986292	0.0275434	3.58087	0.000342457	0.0231729	1.07076	344.562	390.468
chr22_29944850_29948960_plus	735.87	0.0986183	0.0247693	3.98147	6.85e-05	0.0111295	1.07075	719.007	825.398
chr3_188755280_188757440_plus	171.995	0.0977424	0.0204531	4.77886	1.76e-06	0.00259517	1.0701	168.113	191.394
chr17_30401360_30416350_plus	3197.83	0.0975148	0.0238613	4.08673	4.37e-05	0.00868896	1.06993	3126.04	3550.46
chr20_60158300_60163400_plus	495.197	0.0968148	0.0283415	3.41601	0.000635462	0.0304062	1.06941	478.188	547.479
chrX_21943700_21944450_plus	59.9934	0.0967847	0.0285316	3.39219	0.000693351	0.0316756	1.06939	57.5116	65.4697
chr11_9162320_9163270_minus	169.883	0.0964027	0.0291179	3.31077	0.000930398	0.0370752	1.0691	164.958	188.563
chr4_37892180_37900930_plus	1646.48	0.0961855	0.0278155	3.45799	0.000544228	0.0281391	1.06894	1575	1756.28
chr15_90416300_90422510_plus	1085.96	0.0960993	0.0303067	3.17089	0.0015197	0.0490716	1.06888	1068.55	1265.92
chr20_20548620_20555640_minus	1913.7	0.0954095	0.0226697	4.20869	2.57e-05	0.0073044	1.06837	1842.76	2084.72
chr4_159189860_159192530_plus	398.801	0.0952194	0.0282737	3.36777	0.000757795	0.033038	1.06823	386.977	433.24
chr2_159486900_159488480_minus	403.165	0.0942517	0.0266644	3.53474	0.000408181	0.0245519	1.06751	395.669	444.552
chr10_104318910_104320650_minus	595.381	0.0942215	0.0286152	3.2927	0.000992294	0.0389219	1.06749	577.815	662.341
chr13_30771570_30775210_plus	378.987	0.0939525	0.0291818	3.21955	0.00128391	0.0445715	1.06729	363.525	433.716
chr12_100136600_100140490_minus	1407.14	0.0937611	0.0215784	4.34513	1.39e-05	0.0056182	1.06715	1365.51	1548.4
chr1_176187450_176189690_minus	600.334	0.0933743	0.0242697	3.84735	0.0001194	0.0139626	1.06686	588.019	684.057
chr16_3861820_3863070_minus	301.077	0.093057	0.025445	3.65718	0.000255004	0.0203232	1.06663	297.843	341.009
chr6_17869100_17872000_minus	743.842	0.0928983	0.0280346	3.3137	0.000920688	0.0369234	1.06651	724.373	812.525
chr8_22610580_22610920_minus	61.4935	0.0928432	0.0282781	3.28322	0.0010263	0.0395733	1.06647	59.8287	64.9266
chr17_42372490_42373070_minus	128.647	0.0926713	0.0287826	3.21969	0.00128328	0.0445715	1.06634	127.377	141.972
chr9_125179950_125180090_minus	34.2188	0.0925795	0.0287142	3.22418	0.00126335	0.0445049	1.06627	33.5764	36.7248
chr6_136564910_136565350_minus	80.7333	0.0923212	0.0265109	3.48238	0.000496973	0.0268987	1.06608	79.1343	88.9193
chr6_53252570_53253180_minus	148.179	0.0923048	0.0271748	3.39671	0.000682015	0.0314504	1.06607	144.512	158.728
chr20_20697770_20698030_minus	63.296	0.0919299	0.0289577	3.17463	0.00150028	0.0487591	1.06579	62.7569	71.2073
chr14_96949190_96951810_plus	273.791	0.0913405	0.0278098	3.28447	0.00102174	0.0394583	1.06536	262.333	289.376
chr9_113571180_113573950_plus	282.747	0.0907214	0.0280932	3.2293	0.00124093	0.0443922	1.0649	262.426	335.121
chr22_42208330_42208610_minus	55.6114	0.0906426	0.0259319	3.49541	0.000473342	0.0265356	1.06484	55.4722	63.0294
chr20_60165400_60172480_plus	700.631	0.0904183	0.0283177	3.193	0.00140805	0.0469193	1.06468	674.826	762.872
chr13_32106210_32112930_plus	1258.98	0.089711	0.0252582	3.55176	0.000382665	0.0236449	1.06416	1214.72	1362.97
chr1_15869890_15871090_plus	94.0987	0.0893472	0.0250071	3.57288	0.000353081	0.0232213	1.06389	90.8981	102.809
chr17_51051710_51052050_minus	90.5774	0.0892566	0.0274641	3.24994	0.00115431	0.0425188	1.06382	88.331	98.1725
chr4_139468640_139470070_plus	132.78	0.089026	0.0232289	3.83255	0.000126819	0.0144916	1.06365	130.954	144.385
chr17_62624520_62626370_plus	163.242	0.0888474	0.026602	3.33988	0.000838147	0.0348995	1.06352	155.514	172.231
chr10_92990350_92992480_plus	219.228	0.0888276	0.0223021	3.98292	6.81e-05	0.0111295	1.06351	210.701	239.624
chr5_150789110_150790770_plus	146.761	0.0887407	0.0249719	3.55362	0.000379967	0.0235947	1.06344	141.644	160.853
chrX_120451930_120452640_minus	187.281	0.0885412	0.0278771	3.17612	0.00149259	0.0486989	1.06329	181.44	197.901
chr15_42485210_42485700_minus	112.305	0.0883878	0.0279011	3.16789	0.00153547	0.0494548	1.06318	107.375	120.457
chr22_42830220_42830490_minus	49.8922	0.0879809	0.0272685	3.22647	0.00125329	0.0445049	1.06288	47.8032	54.2349
chr5_80412710_80418030_plus	1120.56	0.0878011	0.0243277	3.6091	0.000307259	0.0218866	1.06275	1109.59	1274.18
chr6_53251170_53252340_minus	233.502	0.0873733	0.0248101	3.52168	0.000428819	0.0251906	1.06243	229.618	256.897
chr6_87679850_87680740_minus	230.788	0.0867737	0.0229509	3.78084	0.000156299	0.0155214	1.06199	224.104	249.719
chr6_110793360_110794040_minus	167.28	0.0866356	0.0232353	3.72861	0.000192536	0.0173943	1.06189	164.847	185.506
chr14_77518740_77519150_minus	93.7581	0.0858494	0.0254253	3.37653	0.000734069	0.0327068	1.06131	89.9051	101.35
chrX_24489260_24491730_plus	198.41	0.0849514	0.0259142	3.27818	0.0010448	0.0399235	1.06065	197.014	221.906
chr10_26846530_26846900_minus	87.7641	0.0849245	0.0259064	3.27814	0.00104495	0.0399235	1.06063	86.7106	98.9174
chr11_45958530_45962640_minus	1358.38	0.0848574	0.023878	3.55379	0.000379717	0.0235947	1.06058	1333.55	1489.09
chr2_159505090_159509140_minus	1636.73	0.084508	0.0256203	3.29847	0.000972122	0.0382505	1.06033	1613.55	1774.36
chr11_45994190_46014720_minus	10269.4	0.0844772	0.0232585	3.63209	0.000281131	0.0211441	1.0603	10134.2	11346.9
chr12_7013660_7014250_minus	136.453	0.0839238	0.0227135	3.69489	0.000219984	0.0187062	1.0599	134.081	147.035
chr2_25330850_25331780_minus	172.868	0.0838866	0.0261254	3.21092	0.00132311	0.0452302	1.05987	167.171	193.578
chr12_100129670_100130390_minus	156.599	0.0838248	0.0263364	3.18285	0.00145833	0.0478306	1.05982	153.998	175.277
chr12_100134050_100135700_minus	388.497	0.0832254	0.0234019	3.55635	0.000376039	0.0235849	1.05938	376.947	429.36
chr10_132652170_132664930_plus	3592.06	0.0831341	0.0195865	4.24446	2.19e-05	0.00685422	1.05932	3513.11	3961.36
chr16_3856430_3859400_minus	796.959	0.0829038	0.0213485	3.88336	0.000103022	0.0133899	1.05915	788.206	911.2
chrX_19822520_19824200_minus	541.651	0.0827261	0.0216093	3.82827	0.000129049	0.0146129	1.05902	535.421	610.818
chr16_3860760_3861650_minus	203.215	0.0822093	0.0245229	3.35235	0.000801281	0.0340442	1.05864	202.317	230.928
chr12_31702730_31703930_minus	286.984	0.082046	0.0235032	3.49085	0.000481493	0.0266397	1.05852	280.701	306.299
chr6_110806670_110808630_minus	577.404	0.0816037	0.0228273	3.57483	0.000350458	0.0231729	1.05819	568.456	638.464
chr17_42378140_42381520_minus	1276.46	0.081594	0.025023	3.26076	0.00111114	0.041814	1.05819	1261	1377.66
chr11_3783560_3784280_minus	169.168	0.0809009	0.0228948	3.5336	0.000409948	0.0245519	1.05768	164.796	180.409
chr12_100132870_100133910_minus	221.963	0.0808506	0.0235743	3.42961	0.000604441	0.0297759	1.05764	217.593	246.495
chr3_32473770_32475180_minus	309.097	0.0797228	0.0243185	3.27827	0.00104444	0.0399235	1.05681	302.873	344.789
chr20_2104150_2111060_plus	999.927	0.079722	0.0184815	4.31361	1.61e-05	0.00591068	1.05681	967.537	1081.71
chr20_20693470_20694020_minus	110.194	0.0797099	0.0247352	3.22252	0.00127067	0.0445049	1.05681	109.796	122.708
chr1_181015870_181016430_minus	168.88	0.0788672	0.0219515	3.5928	0.000327145	0.0227411	1.05619	165.711	181.525
chrX_2497030_2499320_minus	701.707	0.0787002	0.0207731	3.78855	0.000151527	0.0153027	1.05607	687.248	775.547
chrX_9655070_9672460_plus	7858.76	0.0786537	0.0207639	3.788	0.000151864	0.0153027	1.05603	7815.35	8838.43
chr10_29704390_29707060_minus	618.878	0.0785023	0.0243378	3.22553	0.00125739	0.0445049	1.05592	613.31	683.73
chr14_50220490_50221870_minus	329.23	0.0785003	0.0241625	3.24885	0.00115873	0.0425188	1.05592	323.725	368.13
chr12_31723130_31728100_minus	1230.37	0.0783792	0.0202595	3.86876	0.000109391	0.0135967	1.05583	1211.25	1324.75
chr16_3799420_3801210_minus	352.927	0.0782976	0.0195325	4.00858	6.11e-05	0.0105425	1.05577	346.979	394.859
chr13_25281690_25283430_minus	431.258	0.077074	0.0226069	3.40931	0.000651278	0.0309853	1.05488	411.644	462.338
chr6_13703170_13703480_minus	70.3222	0.0767373	0.0217056	3.53536	0.000407218	0.0245519	1.05463	69.7454	76.2495
chrX_19804930_19820000_minus	4190.57	0.0762643	0.0206351	3.69585	0.000219152	0.0187062	1.05428	4171.31	4756.87
chr17_60651600_60653680_plus	199.272	0.0745941	0.0221167	3.37276	0.000744201	0.0328258	1.05306	194.262	215.125
chr4_101084750_101085350_minus	118.332	0.0745348	0.0228474	3.26229	0.00110516	0.0416514	1.05302	115.155	129.259
chr20_62298350_62301580_plus	376.564	0.0737638	0.022836	3.23015	0.00123724	0.0443922	1.05246	370.537	409.194
chr22_40293680_40296480_plus	406.488	0.072419	0.020977	3.4523	0.000555833	0.0282718	1.05148	403.083	452.187
chr3_101734300_101737010_plus	243.428	0.0714886	0.0221686	3.22477	0.00126074	0.0445049	1.0508	237.167	257.699
chr17_64083240_64086640_minus	1161.27	0.071401	0.0211691	3.37289	0.000743838	0.0328258	1.05074	1152.52	1310.7
chr3_119832780_119833420_minus	155.283	0.0713643	0.0204361	3.49207	0.000479285	0.0266397	1.05071	154.294	166.954
chr2_239251290_239254450_minus	974.016	0.0711263	0.0221687	3.20841	0.00133471	0.0453818	1.05054	970.28	1093.96
chr7_36865080_36866200_minus	272.836	0.0711029	0.0223335	3.18368	0.00145415	0.0478187	1.05052	269.484	288.837
chr10_75135620_75139460_plus	417.668	0.0704516	0.0165081	4.26771	1.97e-05	0.00641856	1.05005	415.169	457.264
chr12_31720940_31722750_minus	381.274	0.0698949	0.0205813	3.39604	0.000683677	0.0314504	1.04964	377.394	416.165
chr18_21046200_21047460_minus	296.586	0.0689459	0.0193832	3.55699	0.000375125	0.0235849	1.04895	293.072	318.745
chr16_3796860_3799260_minus	679.898	0.0662675	0.0172435	3.84305	0.000121513	0.0140579	1.047	677.738	747.013
chr7_37262200_37263000_minus	160.868	0.0656844	0.0200486	3.27627	0.0010519	0.0400666	1.04658	162.292	176.464
chr1_181010450_181015660_minus	1261.93	0.0651036	0.0167727	3.88153	0.000103802	0.0133899	1.04616	1250.92	1352.63
chr3_58340510_58349260_plus	1170.69	0.0649469	0.0199058	3.26271	0.00110352	0.0416514	1.04605	1162.8	1301.31
chr11_2541460_2544190_plus	322.167	0.0644923	0.0202325	3.18755	0.00143482	0.0474739	1.04572	315.593	357.207
chr20_2112200_2114240_plus	202.098	0.0643461	0.0193141	3.33156	0.000863619	0.0355279	1.04561	200.317	218.934
chr1_51685270_51689110_plus	403.083	0.0642837	0.019	3.38336	0.00071605	0.0323844	1.04557	402.778	448.45
chr3_122488180_122490790_minus	570.977	0.0637241	0.0179181	3.55642	0.000375946	0.0235849	1.04516	561.877	619.998
chr7_36871180_36874340_minus	796.159	0.0624306	0.0162173	3.84963	0.000118297	0.013959	1.04422	797.778	873.262
chrX_19556240_19558190_minus	385.169	0.0620783	0.0170363	3.64389	0.000268553	0.0207354	1.04397	387.007	436.325
chr16_69587970_69602930_plus	2178.89	0.0617812	0.0162821	3.79442	0.000147988	0.0152516	1.04375	2192.95	2430.3
chr5_179756170_179760810_plus	522.465	0.0616877	0.0191674	3.21837	0.00128919	0.0445715	1.04369	521.708	567.055
chr2_8830860_8832310_minus	407.323	0.0614169	0.0173458	3.54074	0.000399008	0.0242575	1.04349	402.69	443.899
chr7_129846060_129847320_minus	318.104	0.0608016	0.0160758	3.78219	0.000155457	0.0154993	1.04305	319.197	355.87
chr1_51850270_51852340_minus	667.676	0.0590151	0.0174828	3.37561	0.000736529	0.0327068	1.04175	671.84	728.892
chr2_173921230_173923480_minus	672.229	0.0585758	0.0150826	3.88366	0.000102897	0.0133899	1.04144	670.794	742.635
chr7_37264460_37266630_minus	722.39	0.0571002	0.0166666	3.42602	0.000612496	0.0300018	1.04037	730.308	780.956
chr17_60519420_60523770_minus	1147.82	0.0545442	0.0170525	3.1986	0.00138095	0.0462607	1.03853	1134.28	1220.68
chr3_57761910_57770860_plus	1401.26	0.0507924	0.0145733	3.4853	0.000491579	0.026764	1.03583	1411.27	1566.44
chr7_112880760_112890330_minus	3468.36	0.0473727	0.0131097	3.61357	0.00030201	0.0218866	1.03338	3480.7	3741.38
chr1_100944810_100954990_plus	2094.78	-0.0452863	0.0138808	-3.26251	0.00110432	0.0416514	0.969097	2216.73	2246.07
chr4_4453170_4456680_minus	815.478	-0.0466815	0.0139341	-3.35017	0.000807609	0.0341111	0.968161	844.16	863.569
chr15_75860680_75866630_plus	682.573	-0.0486921	0.0153724	-3.16751	0.0015375	0.0494548	0.966812	717.882	728.171
chr12_45230850_45249290_plus	2627.42	-0.0507425	0.0149082	-3.40366	0.000664906	0.0312831	0.965439	2795.75	2844.22
chrX_40719840_40723080_minus	1042.36	-0.0535266	0.0164511	-3.25367	0.00113924	0.042425	0.963578	1111.08	1104.63
chr11_20475990_20478510_plus	251.934	-0.0541954	0.0160897	-3.36834	0.000756224	0.033027	0.963131	263.975	264.732
chr18_79256520_79261300_plus	635.415	-0.0546	0.0167906	-3.25182	0.0011467	0.0424499	0.962861	675.44	685.25
chr12_45223440_45226510_plus	460.979	-0.0557651	0.0150774	-3.6986	0.000216792	0.0186434	0.962084	485.535	496.488
chr2_119832760_119839190_plus	814.875	-0.0581194	0.0174461	-3.33137	0.00086419	0.0355279	0.960515	877.039	838.539
chr3_33427200_33428180_minus	232.038	-0.0589061	0.01601	-3.67933	0.00023385	0.0194622	0.959992	244.616	252.028
chr6_126058590_126062990_plus	396.34	-0.0599939	0.0168603	-3.5583	0.000373264	0.0235849	0.959268	422.002	419.156
chr3_128166520_128169770_plus	411.599	-0.0604811	0.0181261	-3.33667	0.000847872	0.0351874	0.958944	441.861	442.226
chr5_157845670_157847050_minus	349.918	-0.060834	0.0161292	-3.77168	0.000162155	0.0158116	0.95871	369.833	368.721
chr3_4631020_4634130_plus	324.577	-0.0612517	0.0186816	-3.27872	0.0010428	0.0399235	0.958432	339.801	338.807
chr8_116730090_116730530_minus	104.937	-0.0622184	0.0194512	-3.1987	0.0013805	0.0462607	0.95779	110.456	109.743
chr3_119307110_119312970_plus	567.684	-0.0633192	0.0184125	-3.43893	0.000584013	0.0291715	0.95706	599.799	615.848
chr11_35742870_35751810_plus	2426.45	-0.0633294	0.0166871	-3.79512	0.000147574	0.0152516	0.957053	2594.47	2557.34
chr14_68304270_68309950_plus	543.373	-0.0635127	0.0190809	-3.3286	0.000872837	0.0356722	0.956931	587.171	576.947
chr5_134942220_134945980_plus	389.388	-0.0636728	0.016487	-3.86201	0.000112459	0.0136616	0.956825	413.215	411.895
chr1_25464880_25467550_plus	228.434	-0.0639764	0.0179164	-3.57083	0.000355851	0.0232213	0.956624	245.53	243.939
chr8_116703220_116704580_minus	372.773	-0.0640519	0.0144224	-4.44115	8.95e-06	0.00505572	0.956574	396.877	395.745
chr9_6952500_6962740_plus	1476.65	-0.0646822	0.0172712	-3.74508	0.000180336	0.0168392	0.956156	1584.65	1587.87
chr10_63514860_63516800_minus	415.577	-0.0647662	0.0177443	-3.64997	0.000262267	0.0205744	0.9561	441.56	438.699
chr13_79390350_79391830_minus	568.096	-0.0652058	0.0198699	-3.28164	0.00103206	0.0397344	0.955809	610.463	606.136
chr12_28340220_28344240_plus	537.784	-0.0662579	0.0206931	-3.20193	0.00136509	0.0460049	0.955112	570.891	563.58
chr5_107951040_107951880_minus	166.243	-0.0665059	0.0204651	-3.24973	0.00115515	0.0425188	0.954948	176.56	174.134
chr9_6936010_6939770_plus	585.715	-0.0668929	0.0201846	-3.31406	0.000919529	0.0369234	0.954692	624.104	625.101
chrX_41710310_41712590_minus	460.594	-0.0675355	0.0192469	-3.50891	0.000449954	0.0259449	0.954267	501.231	484.257
chr8_120677370_120681780_minus	1416.06	-0.0677526	0.0208854	-3.24402	0.00117854	0.0427434	0.954123	1492.63	1469.37
chr1_101047480_101058920_plus	1621.22	-0.0677613	0.0213404	-3.17526	0.00149705	0.048748	0.954117	1753.32	1669.04
chr16_84719080_84724940_plus	750.349	-0.0677949	0.0163987	-4.13417	3.56e-05	0.00838688	0.954095	809.194	804.675
chr2_106114480_106115870_minus	293.595	-0.0682946	0.0199407	-3.42489	0.000615044	0.0300018	0.953765	315.023	303.169
chr9_6766250_6768520_plus	236.92	-0.068575	0.0202162	-3.39208	0.000693636	0.0316756	0.953579	252.623	251.002
chr11_108731520_108738230_plus	796.748	-0.0687539	0.0193415	-3.55474	0.000378359	0.0235947	0.953461	852.34	836.862
chr4_113633160_113637210_minus	1163.21	-0.0687553	0.0217263	-3.16462	0.00155286	0.0496935	0.95346	1247.8	1209.68
chr9_131998370_131999610_minus	247.003	-0.0695204	0.0173779	-4.0005	6.32e-05	0.0106193	0.952955	264.852	261.602
chr13_77316330_77317900_minus	499.347	-0.0695578	0.0182978	-3.80144	0.00014386	0.0152282	0.95293	540.199	529.983
chr6_138909530_138910170_minus	134.84	-0.0697545	0.0202497	-3.44472	0.000571655	0.028784	0.9528	143.289	139.934
chr8_120672750_120674260_minus	324.971	-0.0697992	0.0200922	-3.47395	0.000512858	0.0273652	0.952771	343.975	342.578
chr4_109619790_109633180_plus	2171.55	-0.0701034	0.0208734	-3.3585	0.000783677	0.0335814	0.95257	2360.78	2274.07
chr20_48977460_48983250_plus	806.797	-0.0702027	0.0193444	-3.62909	0.000284421	0.0211441	0.952504	875.262	866.127
chr1_246209420_246211050_minus	358.06	-0.072119	0.0203917	-3.53667	0.000405198	0.0245519	0.95124	386.525	377.02
chr14_67965410_67974730_plus	1757.11	-0.072527	0.0223012	-3.25216	0.00114532	0.0424499	0.950971	1881.48	1816.93
chr12_111853600_111855100_plus	124.109	-0.0734903	0.0209568	-3.50676	0.000453606	0.026048	0.950336	131.343	129.251
chr3_105756570_105760160_minus	1134.51	-0.0737803	0.0230683	-3.19834	0.0013822	0.0462607	0.950145	1201.4	1175.14
chr14_67940100_67953050_plus	2082.44	-0.0741574	0.0212973	-3.48201	0.000497667	0.0268987	0.949897	2259.81	2198.12
chr12_120005390_120008610_plus	389.323	-0.0745056	0.0232136	-3.20956	0.00132936	0.0452617	0.949667	419.088	406.059
chr6_87644500_87645490_plus	97.4202	-0.0745864	0.0229702	-3.2471	0.00116588	0.0425188	0.949614	104.287	103.211
chr1_77604750_77605370_minus	142.81	-0.0747082	0.0211713	-3.52874	0.000417538	0.0248192	0.949534	153.574	153.547
chr3_197239610_197240490_minus	168.683	-0.0753599	0.0210801	-3.57493	0.000350327	0.0231729	0.949105	180.507	177.75
chr6_158803700_158804500_minus	212.465	-0.0757041	0.0227847	-3.32258	0.000891887	0.0362329	0.948879	226.562	228.508
chr8_120795200_120800730_minus	2012.9	-0.0760051	0.0205737	-3.69428	0.000220513	0.0187062	0.948681	2141.74	2084.3
chr8_116727120_116727930_minus	184.799	-0.0766142	0.023779	-3.22192	0.00127335	0.0445049	0.948281	192.727	189.264
chr14_68072310_68079400_plus	1013.35	-0.0768627	0.0224707	-3.42057	0.000624896	0.0301311	0.948117	1100.29	1081.46
chr10_59809410_59809720_minus	70.3059	-0.077124	0.0234776	-3.285	0.00101983	0.0394583	0.947945	73.7037	72.4881
chr6_5505200_5507380_plus	175.725	-0.0772275	0.0243394	-3.17294	0.00150905	0.0489171	0.947877	189.484	188.62
chr14_68097270_68113000_plus	2042.16	-0.0773596	0.0209091	-3.69981	0.000215764	0.018619	0.947791	2222.12	2145.54
chr10_74260020_74265700_plus	670.355	-0.0776158	0.0223019	-3.48023	0.000500987	0.0270198	0.947622	719.664	707.628
chr14_67974840_67979680_plus	681.876	-0.0776442	0.0217535	-3.56927	0.000357981	0.0232213	0.947604	736.463	722.613
chr2_106123890_106125090_minus	304.962	-0.0780389	0.0205924	-3.78969	0.000150838	0.0153027	0.947345	328.586	309.323
chr4_109604400_109618690_plus	2832.15	-0.0787726	0.0243025	-3.24134	0.00118968	0.0430849	0.946863	3150.03	3006.09
chr6_143632450_143644560_plus	2003.49	-0.079064	0.0217019	-3.64318	0.000269291	0.0207354	0.946672	2144.58	2163.42
chr11_108738500_108741130_plus	238.978	-0.0793285	0.022884	-3.46654	0.000527195	0.0278091	0.946498	257.852	256.363
chr6_20688470_20690040_plus	186.337	-0.0794035	0.0234487	-3.38627	0.000708502	0.0321783	0.946449	198.706	193.895
chr4_113706810_113709140_minus	606.217	-0.0798224	0.0242565	-3.29077	0.000999152	0.0389467	0.946174	648.657	627.235
chr1_101032940_101042040_plus	1827.3	-0.0804693	0.0208214	-3.86474	0.000111207	0.013642	0.94575	1994.49	1873.97
chr11_6524100_6525690_plus	186.487	-0.0806517	0.0215073	-3.74996	0.000176862	0.016639	0.94563	200.824	197.804
chr12_28349160_28352170_plus	354.783	-0.0814002	0.0206976	-3.93283	8.4e-05	0.012358	0.94514	381.91	375.349
chr4_113643290_113644020_minus	184.725	-0.0821171	0.0250808	-3.27411	0.00105997	0.0403127	0.94467	201.169	195.859
chr21_44793770_44794360_minus	125.999	-0.0827747	0.0240249	-3.44537	0.000570268	0.0287721	0.94424	134.449	128.037
chr16_84725380_84728280_plus	325.469	-0.0828859	0.0252327	-3.28486	0.00102034	0.0394583	0.944167	357.273	353.303
chr2_62011260_62013020_plus	139.851	-0.0832824	0.0231308	-3.6005	0.000317606	0.0224031	0.943908	150.005	149.815
chr4_113731570_113732740_minus	344.245	-0.083287	0.0216009	-3.85572	0.00011539	0.0138615	0.943905	372.493	356.127
chr8_96263440_96264270_plus	87.48	-0.083393	0.0261533	-3.18863	0.00142949	0.0474444	0.943835	91.3056	89.4917
chr13_73980690_73981440_minus	176.166	-0.0834079	0.0236999	-3.51934	0.00043263	0.0252957	0.943826	190.37	185.33
chr7_44461260_44461700_minus	85.6132	-0.0836525	0.0236912	-3.53095	0.000414064	0.0247302	0.943665	92.3634	90.2165
chr13_77318010_77318400_minus	118.821	-0.0837376	0.0239079	-3.50251	0.000460898	0.0261541	0.94361	129.919	124.139
chr7_92754220_92755350_minus	228.078	-0.0837866	0.0262908	-3.18692	0.00143798	0.0474744	0.943578	243.634	231.971
chr7_92667250_92667960_minus	125.296	-0.0838255	0.0233912	-3.58364	0.000338842	0.0231049	0.943552	134.884	131.196
chr14_91761410_91777060_minus	6832.56	-0.0850917	0.0243523	-3.4942	0.000475481	0.0265356	0.942725	7417.99	7102.51
chr1_77605480_77607400_minus	421.362	-0.0851275	0.0203694	-4.1792	2.93e-05	0.00774954	0.942701	460.113	451.695
chr21_31698500_31698970_minus	105.741	-0.0872635	0.0209606	-4.16322	3.14e-05	0.00817984	0.941307	113.076	112.76
chr8_120783960_120784630_minus	127.002	-0.0876539	0.0251362	-3.48716	0.000488181	0.0267325	0.941052	136.734	135.231
chr3_99865030_99870020_plus	536.711	-0.0877545	0.0230729	-3.80336	0.000142749	0.0152282	0.940986	590.229	557.73
chr17_39768900_39770640_minus	422.485	-0.0880551	0.0273445	-3.22021	0.00128097	0.0445715	0.94079	454.162	456.723
chr7_24960490_24960970_minus	84.4174	-0.0881377	0.0271655	-3.24447	0.00117669	0.0427434	0.940736	89.456	90.8679
chr8_120750190_120751970_minus	341.496	-0.0882206	0.0251671	-3.50539	0.000455938	0.0261034	0.940682	369.438	366.991
chr3_23228680_23240810_plus	2143.68	-0.0883469	0.0257929	-3.42524	0.000614259	0.0300018	0.9406	2341.75	2296.94
chr11_108217650_108217990_minus	84.3168	-0.089186	0.0277083	-3.21875	0.00128753	0.0445715	0.940053	91.0162	87.4055
chr3_99824870_99826710_plus	160.132	-0.0898207	0.0256854	-3.49695	0.00047061	0.0264652	0.93964	175.729	167.04
chr7_105674210_105674320_minus	20.8679	-0.0911217	0.0284504	-3.20282	0.00136089	0.0460049	0.938793	22.3727	22.2165
chr3_156796250_156796780_minus	94.3782	-0.0913844	0.0285	-3.20647	0.00134373	0.0455649	0.938622	100.201	96.8128
chr17_80913650_80917120_plus	363.132	-0.0916246	0.0265234	-3.45448	0.00055135	0.0282495	0.938465	391.113	385.549
chr2_224951400_224952490_minus	283.78	-0.0918129	0.0235705	-3.89524	9.81e-05	0.0133468	0.938343	313.558	299.033
chr3_158724010_158724630_plus	52.6341	-0.0926989	0.0287199	-3.22769	0.00124795	0.0445049	0.937767	56.0069	56.2587
chr7_43697530_43698080_minus	137.131	-0.093208	0.0240674	-3.8728	0.000107593	0.0135967	0.937436	148.512	145.035
chr5_37660320_37663110_plus	481.356	-0.0934074	0.0227132	-4.11247	3.91e-05	0.00838688	0.937306	515.921	504.78
chr2_181183030_181187710_plus	575.986	-0.0935547	0.0294091	-3.18115	0.0014669	0.0479775	0.937211	616.542	589.262
chr9_20538040_20542030_minus	1075.44	-0.0940639	0.0253339	-3.71297	0.00020484	0.0180497	0.93688	1203.36	1104.29
chr4_148327390_148328100_minus	136.348	-0.0948457	0.0297875	-3.18408	0.00145213	0.0478152	0.936372	151.567	139.457
chr3_99877660_99880510_plus	256.029	-0.0949723	0.0242242	-3.92056	8.83e-05	0.0126743	0.93629	282.567	263.398
chr3_99893910_99896720_plus	258.195	-0.0957091	0.0260145	-3.67907	0.00023409	0.0194622	0.935812	284.657	269.048
chr3_99899560_99902020_plus	205.048	-0.0958671	0.0279423	-3.43089	0.000601598	0.0297529	0.93571	225.093	209.158
chr14_68179760_68183330_plus	344.479	-0.0964198	0.0246762	-3.90741	9.33e-05	0.0130426	0.935351	379.086	366.442
chr8_127126000_127128260_plus	182.203	-0.096646	0.0301497	-3.20554	0.00134808	0.0456505	0.935205	202.095	183.119
chr13_113204550_113204820_minus	54.9141	-0.0972207	0.0259881	-3.74097	0.000183308	0.0169272	0.934832	57.9514	56.0165
chr13_73979000_73979300_minus	64.3641	-0.0974238	0.0286489	-3.40062	0.000672338	0.0314145	0.934701	69.8935	67.6844
chr8_79964110_79964300_minus	34.2854	-0.0980378	0.0304407	-3.22061	0.00127918	0.0445715	0.934303	36.75	35.222
chr8_127052050_127055260_plus	321.673	-0.0984824	0.0292069	-3.37189	0.000746535	0.0328258	0.934015	354.016	326.655
chr17_80928510_80929500_plus	120.323	-0.0989094	0.0254516	-3.88618	0.000101834	0.0133899	0.933739	127.873	124.143
chr15_42375860_42377510_plus	158.922	-0.098944	0.0255657	-3.87019	0.00010875	0.0135967	0.933716	169.493	167.308
chr3_99882080_99886000_plus	375.086	-0.0991501	0.0247282	-4.0096	6.08e-05	0.0105425	0.933583	411.162	388.484
chr3_23339810_23343840_plus	645.5	-0.099325	0.026073	-3.80949	0.000139251	0.0152282	0.93347	694.303	670.783
chr1_89722620_89725210_plus	353.885	-0.0993283	0.0228078	-4.35501	1.33e-05	0.00555715	0.933467	386.275	375.121
chr16_81003780_81004030_minus	44.967	-0.0995322	0.0279026	-3.56713	0.000360908	0.0232213	0.933336	47.25	46.7138
chr18_63143400_63148280_minus	1166.33	-0.0998966	0.0274448	-3.63991	0.000272732	0.0208083	0.9331	1295.42	1229.37
chr8_120744930_120746240_minus	335.91	-0.1003	0.0277696	-3.61186	0.000304005	0.0218866	0.932839	366.794	361.917
chr4_113644850_113645090_minus	44.4698	-0.100988	0.0304383	-3.31779	0.000907312	0.0366217	0.932394	48.5972	47.9853
chr12_93416760_93417160_minus	85.6051	-0.101528	0.0245772	-4.13098	3.61e-05	0.00838688	0.932045	91.9676	91.3046
chr9_20535080_20537620_minus	622.431	-0.101538	0.0280644	-3.61803	0.000296859	0.0217141	0.932039	695.037	632.67
chr4_70714090_70714630_plus	45.5705	-0.1016	0.0302183	-3.36222	0.000773195	0.0333535	0.931999	48.9907	48.0477
chr8_120785200_120787150_minus	604.868	-0.101833	0.0212687	-4.78794	1.68e-06	0.00259517	0.931848	656.708	638.191
chr3_23435220_23436120_plus	90.7002	-0.1023	0.0313328	-3.26493	0.0010949	0.041515	0.931547	98.375	95.3211
chr8_28942200_28942620_plus	34.1643	-0.102688	0.0285663	-3.59471	0.000324753	0.022701	0.931296	37.1181	35.378
chr5_151114740_151115120_minus	70.8628	-0.102755	0.0308806	-3.3275	0.000876282	0.0356722	0.931253	76.0509	77.5248
chr8_123028920_123029060_minus	28.2988	-0.103979	0.0285264	-3.64501	0.000267382	0.0207248	0.930463	29.8611	29.044
chr3_23404300_23405980_plus	171.468	-0.104182	0.0300163	-3.47086	0.000518785	0.0275639	0.930332	187.139	179.321
chr8_120780640_120782490_minus	466.829	-0.104339	0.0231806	-4.50112	6.76e-06	0.00445155	0.930231	504.477	497.571
chr18_63188850_63193580_minus	1577.95	-0.104544	0.0311509	-3.35604	0.000790679	0.0337082	0.930099	1750.54	1691.76
chr6_90045340_90050360_minus	1444.42	-0.105118	0.0291298	-3.6086	0.000307856	0.0218866	0.929729	1631.71	1466.9
chr18_63140910_63141490_minus	126.955	-0.105187	0.0330019	-3.1873	0.00143607	0.0474739	0.929684	140.898	134.596
chr3_23391110_23395960_plus	630.599	-0.105361	0.0260688	-4.04166	5.31e-05	0.00983832	0.929572	683.859	654.703
chr17_80738940_80739690_plus	85.425	-0.105527	0.0297569	-3.54631	0.000390668	0.0239503	0.929465	90.5231	87.4404
chr4_25752920_25753640_minus	148.026	-0.105672	0.0287464	-3.67601	0.000236913	0.0196316	0.929372	158.312	155.543
chr20_38985680_38986110_plus	30.8992	-0.105742	0.032805	-3.22333	0.00126707	0.0445049	0.929327	32.3102	31.6807
chr3_23385660_23388230_plus	308.225	-0.106073	0.0295681	-3.5874	0.000333995	0.0228583	0.929114	332.144	322.198
chr7_92815530_92816170_minus	152.105	-0.106141	0.028477	-3.72725	0.00019358	0.0174257	0.92907	165.588	153.774
chr14_86087220_86088900_plus	143.555	-0.106194	0.0296041	-3.58715	0.000334312	0.0228583	0.929035	154.618	150.028
chr6_143690280_143691400_plus	98.4683	-0.106434	0.0301214	-3.5335	0.000410097	0.0245519	0.928881	107.081	105.881
chr4_38512550_38515410_plus	342.899	-0.106718	0.0330977	-3.22432	0.00126272	0.0445049	0.928699	375.002	345.283
chr10_7232940_7233080_minus	28.5899	-0.106857	0.0304989	-3.50363	0.000458961	0.0261034	0.928609	31.2685	29.5505
chr7_92723590_92724540_minus	177.22	-0.107099	0.0259264	-4.13087	3.61e-05	0.00838688	0.928453	190.539	178.442
chr1_243725160_243725510_minus	59.7817	-0.107594	0.0302423	-3.55774	0.000374058	0.0235849	0.928134	66.1319	64.0771
chr13_73950440_73950640_minus	36.1388	-0.10761	0.0314487	-3.42177	0.000622146	0.0300564	0.928124	39.4792	37.8073
chrX_79254340_79265970_plus	2200.24	-0.107746	0.0332903	-3.23654	0.00120986	0.0436895	0.928037	2310.12	2268.24
chr21_14995320_14995460_minus	26.9422	-0.108031	0.0316138	-3.41721	0.000632672	0.0303307	0.927854	29.0463	27.6422
chr9_3574670_3576870_plus	186.856	-0.108068	0.0338424	-3.19327	0.00140673	0.0469193	0.92783	198.824	192.749
chr4_53039680_53039940_minus	50.8539	-0.108125	0.0310269	-3.48488	0.000492354	0.026764	0.927793	56.1551	53.0807
chr8_120748380_120748530_minus	27.8749	-0.108548	0.0334157	-3.24841	0.00116053	0.0425188	0.927521	30.3519	30.0404
chr2_181373500_181374550_plus	93.2989	-0.108756	0.0322577	-3.37147	0.00074768	0.0328258	0.927387	100.822	100.248
chr16_27419910_27421550_plus	208.896	-0.109154	0.0330536	-3.30232	0.000958893	0.0378419	0.927132	224.641	210.941
chr2_181310830_181315100_plus	631.501	-0.109925	0.030532	-3.60034	0.000317806	0.0224031	0.926636	675.049	642.864
chr12_120008780_120013460_plus	524.594	-0.110256	0.0222819	-4.94824	7.49e-07	0.00208226	0.926423	571.317	540.961
chr13_73712970_73713100_minus	21.7966	-0.110272	0.0330701	-3.33451	0.00085451	0.0352873	0.926413	23.9213	22.6587
chr4_113680360_113680520_minus	27.4884	-0.110675	0.0325133	-3.404	0.00066406	0.0312831	0.926154	30.0208	28.2275
chr4_163540950_163542480_minus	323.061	-0.111082	0.0253879	-4.3754	1.21e-05	0.00555715	0.925893	342.657	342.653
chr2_106127720_106127850_minus	23.852	-0.111274	0.0315657	-3.52516	0.00042323	0.0250258	0.92577	25.9167	24.1908
chr1_28415180_28415810_plus	43.9311	-0.111921	0.0319362	-3.50452	0.00045743	0.0261034	0.925355	46.2847	46.2862
chr8_120793220_120793710_minus	94.5215	-0.112065	0.0243861	-4.59543	4.32e-06	0.0040179	0.925263	103.104	99.6404
chr7_92697930_92698170_minus	49.3369	-0.112099	0.0320139	-3.50156	0.000462545	0.0261882	0.925241	53.8056	49.9193
chr22_41862030_41863580_plus	132.202	-0.113198	0.0337106	-3.35792	0.000785307	0.0335937	0.924537	145.877	144.288
chr21_15006210_15006560_minus	77.8188	-0.113207	0.0300073	-3.77265	0.000161521	0.0158116	0.92453	84.4722	78.211
chr6_127736340_127739460_minus	921.931	-0.11331	0.0315052	-3.59654	0.000322476	0.0226684	0.924465	1021.48	952.396
chr3_99818570_99819680_plus	99.8845	-0.113703	0.0275381	-4.12892	3.64e-05	0.00838688	0.924213	110.069	102.554
chr16_78841570_78847320_plus	640.714	-0.113711	0.0312497	-3.63878	0.000273936	0.0208366	0.924208	709.396	689.066
chr7_92698670_92698800_minus	24.8076	-0.113755	0.03244	-3.50663	0.000453823	0.026048	0.924179	27.1782	25.3303
chr7_92698320_92698520_minus	43.113	-0.114394	0.031524	-3.6288	0.000284737	0.0211441	0.92377	46.8866	43.2349
chr18_63176930_63188600_minus	4372.32	-0.114449	0.0290518	-3.93948	8.17e-05	0.0122366	0.923735	4868.67	4576
chr7_18404650_18406060_plus	149.601	-0.115738	0.0359885	-3.21597	0.00130003	0.0448735	0.92291	162.373	160.807
chr3_23328550_23330860_plus	290.19	-0.116062	0.0282238	-4.1122	3.92e-05	0.00838688	0.922703	314.417	307.402
chr2_231059280_231059750_plus	41.3053	-0.116829	0.0294816	-3.96276	7.41e-05	0.0116609	0.922213	43.3241	42.0495
chr6_127739680_127741000_minus	310.647	-0.116838	0.0310296	-3.76537	0.000166301	0.0160065	0.922207	343.356	324.475
chr18_63140020_63140330_minus	55.9897	-0.11695	0.0359408	-3.25395	0.00113811	0.042425	0.922135	62.4699	59.4459
chr7_92720080_92720820_minus	139.578	-0.117116	0.0229287	-5.10784	3.26e-07	0.00163096	0.922029	152.44	144.004
chr7_92652970_92653240_minus	53.3513	-0.117445	0.0315531	-3.72214	0.000197538	0.0176404	0.921819	58.3472	55.1468
chr3_23319510_23322900_plus	451.073	-0.11767	0.0268779	-4.37794	1.2e-05	0.00555715	0.921675	490.991	475.437
chr9_3607710_3610130_plus	252.848	-0.117802	0.0339749	-3.46732	0.000525683	0.0278091	0.921591	268.09	269.145
chr7_92809310_92809500_minus	38.5183	-0.117971	0.037256	-3.16649	0.00154292	0.0495218	0.921483	41.6806	38.0679
chr3_23376050_23379200_plus	430.457	-0.11848	0.0281314	-4.21167	2.53e-05	0.0073044	0.921158	466.132	448.211
chr2_181347870_181350570_plus	246.469	-0.118819	0.0325162	-3.65414	0.000258045	0.0203727	0.920941	265.505	249.947
chr7_92812250_92812810_minus	113.591	-0.118849	0.0272243	-4.36555	1.27e-05	0.00555715	0.920922	123.097	114.288
chr16_78796640_78804600_plus	878.34	-0.118922	0.0292311	-4.06834	4.74e-05	0.00904533	0.920876	973.514	947.572
chr4_73274370_73275910_plus	180.227	-0.119044	0.0324772	-3.66548	0.000246877	0.0201241	0.920797	199.002	186.053
chr6_127859570_127860660_minus	234.949	-0.119246	0.0367155	-3.24785	0.00116281	0.0425188	0.920668	256.303	232.321
chr13_74017780_74017980_minus	40.6485	-0.119814	0.0326072	-3.67446	0.000238356	0.019686	0.920306	45.7755	43.1633
chr17_14149690_14150250_plus	45.786	-0.119861	0.0346387	-3.46033	0.000539512	0.0281391	0.920276	48.3032	46.4
chr6_90068300_90069670_minus	382.472	-0.120326	0.0336903	-3.57152	0.000354918	0.0232213	0.91998	440.824	396.778
chr6_90161490_90166200_minus	1365.46	-0.120935	0.0381388	-3.17092	0.00151955	0.0490716	0.919591	1571.99	1396.6
chr7_141553570_141553900_plus	26.8213	-0.122191	0.0364643	-3.35098	0.000805261	0.0340976	0.918791	28.1551	28.0789
chr7_92665790_92666490_minus	161.442	-0.122393	0.0253173	-4.83437	1.34e-06	0.00246416	0.918662	178.123	169.431
chr6_90110610_90112470_minus	525.866	-0.123651	0.0386624	-3.19823	0.00138274	0.0462607	0.917862	600.005	522.389
chr2_181406610_181408450_plus	184.224	-0.123848	0.0291445	-4.24945	2.14e-05	0.0067884	0.917737	199.711	187.58
chr18_63235640_63243500_minus	3623.26	-0.124019	0.0353164	-3.51164	0.000445349	0.0258582	0.917628	4107.98	3861.84
chr16_78787600_78795010_plus	777.05	-0.124048	0.0310517	-3.99489	6.47e-05	0.0106562	0.917609	870.299	835.659
chrX_1488870_1491810_minus	2253.23	-0.124252	0.0339319	-3.6618	0.000250451	0.0202178	0.91748	2474.22	2413.58
chr6_90144760_90148720_minus	1155.63	-0.124331	0.0384738	-3.23157	0.00123111	0.044265	0.917429	1329.12	1171.25
chr7_18552340_18555590_plus	340.276	-0.12479	0.0366998	-3.40029	0.000673153	0.0314145	0.917138	363.623	354.675
chr3_27393540_27393690_minus	31.0003	-0.12498	0.0299145	-4.17792	2.94e-05	0.00774954	0.917016	33.5046	31.7266
chr7_92708360_92708500_minus	26.0859	-0.125037	0.0358836	-3.48451	0.000493036	0.026764	0.916981	28.2338	25.8367
chr6_127732230_127734070_minus	372.096	-0.125072	0.0350968	-3.56363	0.00036576	0.0232904	0.916958	409.803	376.879
chr6_90175840_90180210_minus	1815.12	-0.126934	0.0366535	-3.46309	0.000534012	0.0280161	0.915775	2086.31	1831.36
chr7_92762160_92762310_minus	34.4305	-0.127078	0.0378338	-3.35885	0.000782683	0.0335814	0.915684	37.0394	33.6018
chr18_63287760_63293450_minus	2520.02	-0.128522	0.0367517	-3.49705	0.00047044	0.0264652	0.914768	2867.62	2705.55
chr16_78891720_78893980_plus	167.698	-0.128564	0.0362109	-3.55042	0.000384613	0.0237067	0.914742	188.993	180.145
chr6_158284880_158285140_plus	19.2792	-0.129449	0.0387286	-3.34246	0.0008304	0.0347198	0.914181	21.5046	20.3541
chr16_78805290_78811230_plus	593.547	-0.129523	0.0330435	-3.91978	8.86e-05	0.0126743	0.914134	670.368	638.286
chr18_63227270_63230220_minus	1081.52	-0.130001	0.0374422	-3.47203	0.000516531	0.0275025	0.913831	1228	1169.52
chr18_63230640_63235470_minus	2332.37	-0.130327	0.031755	-4.10415	4.06e-05	0.00846283	0.913624	2599.74	2428.53
chr14_68367550_68367960_plus	43.4057	-0.130584	0.037922	-3.4435	0.000574247	0.0288565	0.913461	47.3287	43.7431
chr6_90124400_90124840_minus	85.9772	-0.131754	0.0412999	-3.19018	0.00142185	0.0472809	0.912721	97.0972	84.6844
chr7_92638320_92638500_minus	28.4986	-0.132006	0.0303744	-4.34595	1.39e-05	0.0056182	0.912562	30.8287	28.8734
chrX_79218460_79223580_plus	642.929	-0.132006	0.0314994	-4.19073	2.78e-05	0.00774954	0.912562	692.866	689.628
chr18_63148520_63149090_minus	117.972	-0.132432	0.0306079	-4.32673	1.51e-05	0.00591068	0.912292	131.803	122.972
chr16_78795120_78796510_plus	224.333	-0.132673	0.0322426	-4.11483	3.87e-05	0.00838688	0.91214	250.461	239.855
chr3_58116210_58116620_plus	28.6066	-0.132748	0.0393208	-3.37601	0.000735446	0.0327068	0.912093	31.7384	28.655
chr18_63202070_63205710_minus	1222.92	-0.132857	0.0340714	-3.89938	9.64e-05	0.0133468	0.912023	1381.45	1301.2
chr6_90141770_90143820_minus	488.773	-0.13371	0.0383204	-3.48926	0.000484358	0.0266397	0.911485	564.9	494.228
chr6_7200910_7201230_plus	25.1305	-0.134721	0.036517	-3.68926	0.000224907	0.0188869	0.910846	26.9444	27.3541
chr7_92653480_92653770_minus	49.1687	-0.134756	0.0308585	-4.3669	1.26e-05	0.00555715	0.910824	54.0255	50.5468
chr16_78757760_78766630_plus	1123.27	-0.134876	0.0315571	-4.27403	1.92e-05	0.00641856	0.910748	1260.03	1192.88
chr3_112491460_112491600_minus	31.6775	-0.13543	0.0419389	-3.22923	0.00124124	0.0443922	0.910398	34.787	30.9651
chr1_61141550_61141740_plus	14.0294	-0.135654	0.0422522	-3.21057	0.00132471	0.0452302	0.910257	15.2014	14.6477
chr6_127833420_127834570_minus	257.653	-0.138084	0.0332971	-4.14702	3.37e-05	0.00838688	0.908725	282.229	257.697
chr12_104999160_104999820_plus	56.5108	-0.138349	0.0323843	-4.27212	1.94e-05	0.00641856	0.908558	60.706	56.7982
chr7_92721080_92721240_minus	28.2716	-0.139988	0.0309104	-4.52883	5.93e-06	0.00412293	0.907527	31.1319	28.9156
chr11_83056290_83056420_minus	24.4839	-0.140787	0.0420772	-3.34593	0.000820069	0.0344333	0.907024	27.338	24.5725
chr6_90152020_90153490_minus	417.974	-0.141112	0.0418742	-3.36989	0.00075197	0.0328987	0.90682	477.752	412.631
chr5_88735790_88735920_minus	23.8235	-0.142537	0.0389078	-3.66347	0.00024882	0.0201512	0.905924	25.1829	23.8862
chr7_92709760_92709900_minus	30.9453	-0.142625	0.0353517	-4.03446	5.47e-05	0.00999691	0.905869	34.0741	30.8862
chr14_68096380_68097090_plus	75.5787	-0.142648	0.0321125	-4.44213	8.91e-06	0.00505572	0.905855	83.6968	78.6624
chr2_190352170_190352360_plus	16.1828	-0.146087	0.0459275	-3.18083	0.00146856	0.0479775	0.903698	16.912	16.0752
chr6_90119710_90121150_minus	347.168	-0.146419	0.0398949	-3.67011	0.000242445	0.0198924	0.903491	400.539	343.031
chr18_63174330_63174470_minus	25.3885	-0.147141	0.0411193	-3.57841	0.000345695	0.0231729	0.903038	28.6042	27.3046
chr7_18460780_18461160_plus	25.8219	-0.148096	0.045926	-3.22467	0.00126116	0.0445049	0.90244	27.4931	27.6165
chr5_14444820_14445190_plus	27.6063	-0.148708	0.0406949	-3.65423	0.000257956	0.0203727	0.902058	30.7569	29.9596
chr16_78833770_78837920_plus	534.094	-0.14936	0.0325612	-4.58705	4.5e-06	0.0040179	0.90165	601.493	564.794
chr18_63173290_63174080_minus	196.724	-0.149488	0.0379902	-3.93492	8.32e-05	0.0123238	0.90157	217.222	201.527
chr18_63205860_63206280_minus	112.738	-0.149506	0.0466948	-3.20176	0.0013659	0.0460049	0.901559	129.644	120.91
chr10_101467040_101467210_plus	12.9653	-0.151171	0.043761	-3.45446	0.000551393	0.0282495	0.900519	13.7963	13.011
chr8_60916480_60916970_plus	37.0479	-0.151176	0.0405307	-3.72991	0.000191548	0.0173943	0.900516	39.3032	37.4367
chr2_198032180_198032660_plus	38.6025	-0.15443	0.0458927	-3.36503	0.000765366	0.0332721	0.898487	42.7454	38.8459
chr10_74167470_74167810_plus	30.1797	-0.155374	0.0381696	-4.07062	4.69e-05	0.00904533	0.8979	33.4074	30.1193
chr3_99824450_99824710_plus	20.0893	-0.157321	0.0398852	-3.94434	8e-05	0.0121362	0.896689	22.5301	20.3798
chr16_78782450_78785540_plus	362.607	-0.157721	0.0341428	-4.61945	3.85e-06	0.00385136	0.89644	409.5	386.712
chr12_47239330_47239670_plus	23.0457	-0.157824	0.0445768	-3.5405	0.000399365	0.0242575	0.896376	25.9653	24.3064
chr6_90127660_90128000_minus	57.4285	-0.161522	0.0419693	-3.84856	0.000118812	0.013959	0.894082	66.75	58.4
chr7_92752030_92752200_minus	35.2123	-0.163312	0.037786	-4.32202	1.55e-05	0.00591068	0.892973	38.5625	34.356
chr16_78915670_78917350_plus	117.761	-0.163411	0.0339762	-4.80956	1.51e-06	0.00252357	0.892912	132.606	125.42
chr11_61116760_61117020_plus	20.2425	-0.167571	0.0503603	-3.32744	0.000876466	0.0356722	0.89034	22.1597	19.345
chr8_59017010_59017130_minus	22.3065	-0.167995	0.0486554	-3.45276	0.000554878	0.0282718	0.890079	23.8171	22.3615
chr12_120046600_120046830_plus	16.0593	-0.169331	0.0438312	-3.86326	0.000111884	0.0136581	0.889255	17.8657	16.5303
chr6_90033810_90034180_minus	73.7347	-0.169801	0.0405827	-4.18408	2.86e-05	0.00774954	0.888965	84.2778	72.8275
chr4_38512110_38512410_plus	21.8442	-0.170537	0.0534597	-3.19001	0.00142268	0.0472809	0.888512	23.9282	20.6569
chrX_56395070_56397080_plus	159.006	-0.170896	0.0432328	-3.95294	7.72e-05	0.011999	0.888291	184.34	164.554
chr16_78777460_78777900_plus	29.9387	-0.171391	0.0471969	-3.6314	0.000281884	0.0211441	0.887986	33.9977	32.9248
chr18_63285900_63286290_minus	73.8701	-0.171785	0.0490253	-3.50401	0.00045831	0.0261034	0.887744	85.4537	78.5321
chr16_78915350_78915530_plus	11.4356	-0.171927	0.0510156	-3.3701	0.000751417	0.0328987	0.887656	12.9167	12.1578
chr3_23251410_23251550_plus	12.2185	-0.190565	0.0467693	-4.07457	4.61e-05	0.00901288	0.876263	13.5926	12.545

## Sheet: Replicated DE eRNAs
	pvalue_Dis	padj_Dis	log2FoldChange_Dis	baseMean_raw.Case_Dis	baseMean_raw.Control_Dis	pvalue_Rep	padj_Rep	log2FoldChange_Rep	baseMean_raw.Case_Rep	baseMean_raw.Control_Rep	Direction
chr5_10486550_10486710_plus	3.32e-06	0.00373377	0.292361	12.2422	9.51157	0.00155145	0.0101081	0.185731	8.9274	7.97241	1
chr1_192908170_192908280_plus	0.000606433	0.0298153	0.281712	10.7229	8.87037	0.000364014	0.00348021	0.41534	8.92055	6.72644	1
chr13_109258710_109259540_minus	0.000955637	0.0377801	0.278585	195.798	153.363	0.00729807	0.0327114	0.220485	136.168	110.064	1
chr16_66591170_66591300_plus	0.000110742	0.013642	0.255481	12.9872	10.5579	0.020224	0.0697764	0.235855	9.37945	7.70115	1
chr9_77956920_77957180_plus	5.26e-06	0.00412293	0.254842	23.6183	19.6551	0.000773105	0.0060699	0.182915	16.0425	14.7195	1
chr14_77037760_77038300_minus	4.16e-05	0.00854193	0.252518	116.099	85.2685	0.000222356	0.00239651	0.210618	75.5932	68.1517	1
chr18_76571910_76572040_plus	8.51e-05	0.0123849	0.247689	11.5633	8.99537	0.0276467	0.0877069	0.236482	8.44795	7.33333	1
chr6_26174450_26174570_minus	4e-05	0.00846283	0.247109	24.0018	20.6343	1.33076e-05	0.000297138	0.229382	24.0247	21.8782	1
chr1_12157690_12158270_plus	6.41e-05	0.0106193	0.245855	40.9982	31.7338	0.000588551	0.00495087	0.178675	34.5466	31.3655	1
chr20_23061640_23061870_minus	5.68e-06	0.00412293	0.244536	42.4991	35.456	3.75052e-10	1.23601e-07	0.308222	36.163	30.0552	1
chr7_102898660_102898790_minus	4.42e-06	0.0040179	0.2407	26.7321	21.6111	1.61354e-07	1.13537e-05	0.245005	20.9288	18.0069	1
chr15_84814680_84814810_plus	5.82e-06	0.00412293	0.236113	10.5927	8.62963	0.00606955	0.0284312	0.138699	6.97945	6.55402	1
chr14_77038490_77038620_minus	0.000350453	0.0231729	0.235631	27.0312	19.9954	0.00147193	0.00973618	0.195046	18.7795	17.0046	1
chr6_27834980_27835120_minus	6.22e-05	0.0106193	0.233347	30.156	26.0278	1.036e-06	4.44587e-05	0.26234	22.9137	19.8368	1
chr1_17312490_17313150_plus	2.81e-05	0.00774954	0.231527	52.2477	40.3796	0.000217022	0.00234836	0.190023	50.863	43.8552	1
chr20_47728540_47728740_plus	0.000674592	0.0314145	0.228305	15.811	12.7523	0.036622	0.10754	0.239537	13.0726	10.4966	1
chr1_153386790_153387090_plus	0.000116375	0.0138681	0.224341	32.2147	29.0648	6.63276e-08	6.08042e-06	0.292608	38.8603	32.7471	1
chr9_89383400_89383530_plus	0.000776469	0.0333868	0.223799	10.5963	9.63194	4.36907e-07	2.38968e-05	0.312133	10.3014	9.1908	1
chr2_63256780_63258510_plus	1.07e-05	0.00524824	0.22308	238.204	188.532	1.10253e-06	4.66261e-05	0.224959	177.066	149.952	1
chr2_101965910_101975320_plus	3.78e-06	0.00385136	0.221495	1449.4	1149.29	1.89385e-06	6.86718e-05	0.201597	1044.72	914.676	1
chr5_89432550_89433770_plus	1.07e-06	0.00244454	0.220831	122.782	100.868	4.58333e-12	4.65618e-09	0.28524	89.8671	77.023	1
chr20_60055000_60055200_plus	0.000917697	0.0369218	0.219011	18.5394	15.8032	0.0362752	0.10692	0.25657	16.7548	13.9517	1
chr7_106395460_106407690_plus	6.35e-05	0.0106193	0.218053	1494.55	1258.89	8.06865e-06	0.000205545	0.219323	1108.23	982.145	1
chr9_77951640_77952200_plus	1.91e-05	0.00641856	0.216754	44.2495	37.3403	3.08774e-08	3.48005e-06	0.258165	33.2959	29.0621	1
chr15_58505500_58505730_minus	3.67e-05	0.00838688	0.214643	56.756	48.3981	6.5144e-09	1.1357e-06	0.275933	43.7082	38.4161	1
chr20_56463320_56463480_plus	8.68e-06	0.00505572	0.214518	16.6055	13.5949	0.000148715	0.00176472	0.194875	11.1329	10.3287	1
chr12_10244200_10244340_plus	5.66e-05	0.010194	0.213545	11.4459	9.26852	8.12153e-06	0.000206287	0.234799	7.98767	7.08506	1
chr1_21317790_21317900_minus	0.000174102	0.0164411	0.212923	17.3248	12.6505	0.0421168	0.119005	0.0817359	17.7247	17.131	1
chr12_89441060_89441800_plus	0.00037725	0.0235947	0.212278	57.3046	49.1736	2.59976e-05	0.000483808	0.235631	47.4301	41.5471	1
chr9_77960260_77960690_plus	0.000141316	0.0152282	0.212045	43.444	38.0208	3.43828e-07	1.98482e-05	0.267251	32.4219	28.4092	1
chr22_21829620_21829800_plus	0.00059327	0.0294575	0.209896	16.5248	14.3032	0.000439641	0.00399513	0.192171	12.7863	11.8851	1
chr1_220788320_220788480_plus	0.000206573	0.0181385	0.208661	12.6367	10.375	5.23326e-05	0.000821265	0.216888	9.67397	8.36322	1
chr12_10235240_10235890_plus	3.27e-06	0.00373377	0.208548	53.2202	43.9977	1.51047e-10	6.24207e-08	0.250972	41.7767	36.2621	1
chr6_28253840_28255190_plus	1.33e-05	0.00555715	0.206235	130.914	111.748	1.38883e-13	5.16544e-10	0.323775	106.458	88.0391	1
chr5_10503360_10503620_plus	0.000483793	0.0266397	0.205402	20.5083	16.2153	0.00210799	0.0127454	0.16281	15.374	13.823	1
chr12_31956900_31957570_minus	2.98e-07	0.00163096	0.203343	221.51	182.134	1.69095e-12	3.00331e-09	0.263449	151.352	129.372	1
chr20_47763750_47764130_minus	5.07e-06	0.00412293	0.202665	90.033	65.1157	0.00035286	0.00340101	0.132299	66.3945	60.492	1
chr5_173778830_173779360_plus	0.00041933	0.0248667	0.201663	55.5303	47.0579	0.000106474	0.0013684	0.208103	47.0356	41.1333	1
chr12_64737620_64737740_plus	0.00022183	0.0187544	0.201492	10.178	8.62731	0.00618922	0.0288277	0.137459	8.9726	8.46667	1
chr14_64760860_64761030_plus	9.77e-05	0.0133468	0.200959	13.1413	10.5324	2.60427e-06	8.72613e-05	0.220073	11.2178	9.95172	1
chr10_71726730_71726840_minus	0.000301664	0.0218866	0.200627	19.789	14.662	0.00261754	0.0150337	0.143632	15.7329	14.6621	1
chr14_77039180_77040140_minus	0.000347518	0.0231729	0.199494	221.853	170.083	0.00022642	0.00242686	0.194598	149.182	133.903	1
chr14_68932350_68932610_minus	7.46e-06	0.00478771	0.199072	49.5963	39.6227	0.00388094	0.020371	0.104321	39.2534	36.8069	1
chr5_89441030_89441220_plus	0.000115212	0.0138615	0.19827	18.8587	16.3588	1.51782e-08	2.12454e-06	0.268987	15.189	13.1563	1
chr2_37347370_37352090_plus	1e-05	0.00505572	0.198218	555.013	467.757	6.21838e-12	5.39652e-09	0.276778	425.174	357.306	1
chr5_10446210_10446340_plus	0.000368472	0.0234036	0.197854	10.1523	8.50694	1.34142e-07	1.00356e-05	0.28211	8.22877	7.06437	1
chr12_10245850_10245980_plus	0.00127202	0.0445049	0.197795	11.7046	9.46991	0.0285817	0.089881	0.130093	8.70137	7.93793	1
chr7_102890020_102891830_minus	1.6e-05	0.00591068	0.196091	442.022	363.792	4.58537e-06	0.000133535	0.18757	298.063	261.248	1
chr22_42421100_42422310_minus	0.000143901	0.0152282	0.1959	245.694	175.146	0.000905925	0.00682261	0.129936	227.985	212.694	1
chr20_1854360_1854750_minus	3.9e-05	0.00838688	0.194802	69.8037	53.081	0.00743165	0.033159	0.105041	53.1041	49.6598	1
chr5_89437180_89439080_plus	8.81e-06	0.00505572	0.193891	185.279	158.34	5.01744e-13	1.06322e-09	0.282314	156.305	132.749	1
chr12_68787830_68788020_plus	0.000360963	0.0232213	0.193281	14.8899	12.7407	0.000360172	0.00345253	0.179666	16.3192	14.4161	1
chr6_41224810_41225050_minus	0.000118098	0.013959	0.192789	48.0569	39.6065	0.00126445	0.0086998	0.154295	33.5068	30.4184	1
chr16_66224120_66224250_minus	6.39e-05	0.0106193	0.191964	26.0844	21.3148	1.04914e-08	1.62586e-06	0.257034	21.8863	19.0276	1
chrX_30593610_30593730_minus	7.36e-05	0.0116506	0.190561	22.0899	18.3542	0.000646405	0.00531391	0.148028	17.4781	15.7218	1
chr5_140274570_140276610_plus	3.21e-06	0.00373377	0.190306	184.468	148.731	0.0134563	0.0518534	0.0908475	147.878	140.91	1
chr18_77001250_77001370_minus	1.38e-06	0.00246416	0.188833	23.6404	19.2593	0.00185966	0.0115857	0.109645	18.6137	17.6368	1
chr20_665590_672580_plus	7.94e-05	0.0121194	0.187244	1459.81	1113.18	5.8114e-05	0.000889685	0.161769	1164.75	1047.64	1
chr2_112680690_112681800_plus	3.89e-05	0.00838688	0.187009	104.453	91.5185	6.53084e-14	3.40061e-10	0.334047	86.5096	73.046	1
chr10_6204630_6206400_plus	0.000148097	0.0152516	0.18671	206.158	164.333	0.000459978	0.00411106	0.157028	163.288	151.115	1
chr5_150514690_150515940_plus	0.000239351	0.0197032	0.186499	123.596	94.794	0.0310204	0.0953051	0.100273	86.6685	78.6115	1
chr19_5154300_5155690_plus	8.74e-08	0.000728673	0.186187	141.222	110.146	0.000777332	0.0060873	0.104198	94.6164	90.508	1
chr14_68915330_68915540_minus	8.4e-07	0.00210213	0.185338	57.9468	46.4907	0.0160777	0.0589469	0.0807637	42.0438	40.4989	1
chr12_10228410_10229760_plus	6.14e-07	0.00208226	0.185286	169.517	143.544	5.19996e-13	1.06322e-09	0.248196	125.573	107.476	1
chr7_131121800_131122290_plus	5.81e-05	0.0102453	0.185281	45.8037	38.1019	1.79022e-06	6.63937e-05	0.2036	34.9247	31.3241	1
chr5_140272680_140273080_plus	0.000258068	0.0203727	0.185114	36.6385	30.4167	0.0350193	0.104162	0.0969829	26.0123	24.6253	1
chr1_21337730_21337840_minus	0.000181091	0.0168468	0.184154	23.233	17.9398	0.000494803	0.00432724	0.142624	18.4726	16.977	1
chr6_158657000_158657850_plus	7.18e-07	0.00208226	0.183996	93.2128	74.4074	0.00761279	0.033736	0.0920197	65.2712	62.2207	1
chr15_58506420_58506670_minus	0.000481149	0.0266397	0.183946	51.3303	44.2222	4.86478e-06	0.000139795	0.225864	37.289	33.4207	1
chr9_91415450_91415620_minus	0.00010482	0.0134519	0.183669	40.0239	33.8264	4.99356e-06	0.000142552	0.20217	28.5479	25.2207	1
chrX_17549620_17550620_plus	0.000267497	0.0207248	0.183418	86.9817	71.1366	0.000688577	0.00556089	0.142778	61.9205	55.4115	1
chr3_52226670_52226780_minus	8.62e-05	0.0124697	0.180097	23.0404	18.2153	0.000579409	0.00489293	0.144797	17.1534	16.3172	1
chr5_89436040_89436920_plus	0.000381622	0.0236389	0.178674	80.2862	69.0926	1.72879e-10	6.61896e-08	0.286069	64.226	54.554	1
chr16_84598300_84598780_plus	0.000430669	0.02524	0.1785	35.7486	27.2106	0.0402637	0.115207	0.0910883	28.8959	27.5632	1
chr12_31950400_31950940_minus	5.45e-06	0.00412293	0.178421	111.077	91.6944	3.61431e-08	3.95372e-06	0.193914	80.1562	71.8713	1
chr11_46127130_46127610_plus	0.00016056	0.0158116	0.178273	37.8477	33.0278	2.23501e-07	1.43929e-05	0.226443	29.3041	26.7448	1
chr20_47739180_47739380_minus	9.03e-05	0.0127703	0.178257	39.8661	31.1968	0.000602909	0.00503533	0.132928	28.9384	26.4322	1
chr10_97517030_97517490_plus	0.000510404	0.0273509	0.178146	43.956	34.6273	0.0258326	0.083443	0.0999596	30.7151	28.7448	1
chr10_6375660_6387680_plus	9.81e-05	0.0133468	0.177591	2357.9	1941.06	0.0351943	0.104527	0.0834165	1762.95	1638.44	1
chr11_74450650_74450850_minus	3.43e-06	0.00373377	0.176505	43.0147	37.6065	5.27633e-07	2.72558e-05	0.194484	27.2575	24.7563	1
chr22_42418830_42420170_minus	0.000533432	0.0280161	0.175573	371.778	264.502	0.000639556	0.00526925	0.131385	326.847	304.867	1
chr12_47889300_47889590_plus	0.000831056	0.0347198	0.175261	24.978	22.1829	0.000148426	0.00176219	0.198386	20.1356	18.3448	1
chr7_102872940_102873990_minus	0.000289628	0.0213804	0.173984	272.851	226.532	7.83122e-05	0.00110613	0.170087	189.051	166.175	1
chr20_1819870_1820490_minus	4.05e-05	0.00846283	0.1736	124.637	98.9236	1.69449e-06	6.37515e-05	0.17388	97.8959	88.7839	1
chr20_1857520_1858170_minus	0.0002528	0.0202767	0.172981	146.479	115.438	0.0148343	0.0557302	0.0938747	126.014	118.453	1
chr11_126419590_126420640_plus	1.23e-05	0.00555715	0.17297	100.73	82.4398	0.00140456	0.00942467	0.115681	69.5438	65.3333	1
chr16_66207010_66207400_minus	2.43e-05	0.00724916	0.172577	85.6073	72.3356	2.75751e-07	1.6932e-05	0.203562	61.4041	54.2851	1
chr10_104349680_104350020_plus	0.000283578	0.0211441	0.172389	36.1835	31.2662	0.00019908	0.00220181	0.1695	24.4795	22.8621	1
chr4_184750860_184752860_minus	1.77e-05	0.00629196	0.172089	561.677	465.285	0.000244968	0.00257999	0.136592	394.23	363.786	1
chr22_42425040_42428280_minus	0.000330413	0.0228286	0.171938	944.91	680.345	0.000779017	0.00609793	0.129543	780.482	730.917	1
chr15_69763780_69764340_plus	0.000543334	0.0281391	0.17135	55.0917	46.2986	1.18283e-06	4.92718e-05	0.219216	38.0767	33.8529	1
chr16_84598900_84600460_plus	1.79e-05	0.00629196	0.171098	149.817	116.252	0.00160202	0.0103779	0.115203	127.078	119.057	1
chr5_140222320_140224250_plus	8.31e-05	0.0123238	0.170346	206.884	168.259	0.00150376	0.00989896	0.115637	151.373	142.745	1
chr6_30497480_30497870_plus	0.000152263	0.0153027	0.169691	37.9358	32.7593	1.57959e-05	0.000333928	0.180109	31.074	28.1333	1
chr21_37829250_37833740_plus	7.28e-05	0.0115982	0.169191	1235.93	1035.28	5.06211e-16	1.31792e-11	0.294154	972.699	819.11	1
chr5_160296290_160297650_minus	0.000264313	0.0206057	0.1677	367.905	296.444	5.70889e-05	0.000877397	0.150811	257.068	233.409	1
chr5_140284740_140285230_plus	0.000823736	0.0345293	0.167485	40.145	33.6319	0.0404308	0.11557	0.0936738	32.0616	30.3517	1
chr14_50939420_50939750_minus	0.000392615	0.0239639	0.167043	90.2789	75.9421	1.86506e-05	0.000375827	0.179421	63.6014	57.3425	1
chr1_59550240_59550630_plus	0.000147602	0.0152516	0.166075	33.0954	28.6644	2.812e-05	0.000510534	0.195389	23.1247	20.6207	1
chr5_140250960_140254430_plus	7.61e-05	0.0119093	0.164875	669.281	560.083	0.0458913	0.126646	0.0755311	482.029	462.49	1
chr20_713430_716990_plus	0.000123688	0.0141986	0.164717	517.037	430.326	0.0172807	0.0621585	0.094894	332.122	316.333	1
chr3_71759450_71759720_minus	0.00101005	0.0392493	0.164312	54.1798	44.6667	0.000236696	0.0025132	0.165337	39.6959	36.5908	1
chr16_66222400_66223260_minus	5.45e-05	0.00999691	0.164312	216.921	181.993	1.60234e-09	3.86268e-07	0.223346	159.899	140.798	1
chr1_10385720_10385940_plus	0.000488088	0.0267325	0.163859	24.844	20.7176	0.0149218	0.055962	0.122636	15.0616	13.9977	1
chr19_3165620_3166750_plus	0.000928159	0.0370449	0.162885	312.539	277.572	1.72591e-10	6.61896e-08	0.296875	255.858	214.738	1
chr5_140184150_140186640_plus	3.21e-05	0.00818612	0.162072	284.007	239.347	0.00414791	0.0214353	0.101121	196.612	188.848	1
chr10_6247940_6258940_plus	0.00029762	0.0217141	0.161429	1615.58	1333.26	0.0293993	0.091798	0.0831558	1172.41	1096.44	1
chr15_63918370_63918610_minus	0.000136404	0.0152282	0.161316	41.6826	35.4838	0.000124804	0.00154661	0.144139	35.7945	32.2782	1
chr1_21340880_21341570_minus	2.33e-05	0.00701942	0.160691	137.345	106.812	8.44474e-05	0.00115878	0.122202	116.571	109.69	1
chr15_69749690_69750690_minus	0.00139929	0.0467519	0.159654	229.429	202.613	1.71299e-08	2.31787e-06	0.277134	198.253	176.503	1
chr16_66225130_66225620_minus	0.000292503	0.0215291	0.159438	89.9505	76.169	2.34136e-08	2.85878e-06	0.223478	78.2288	68.6598	1
chr20_1858280_1861550_minus	9.69e-05	0.0133468	0.159417	778.185	641.12	0.0010108	0.00739843	0.112195	594.525	552.605	1
chr7_23600510_23600650_plus	0.000182163	0.0168838	0.159185	11.7945	9.59722	0.00730659	0.0327357	0.116236	6.5137	6.22069	1
chr16_11613470_11613780_minus	0.0012649	0.0445049	0.158927	72.3193	64.1389	2.50052e-06	8.49884e-05	0.222371	60.9411	54.4023	1
chr14_64761230_64761800_plus	0.000630767	0.0303307	0.15804	50.8239	41.5718	1.49023e-05	0.000320646	0.180003	37.7753	34.4207	1
chr4_184792060_184793540_minus	0.0011773	0.0427434	0.157991	467.541	382.164	0.00418535	0.0215718	0.123462	317.155	292.736	1
chr2_191739600_191740450_plus	0.000996567	0.0389467	0.157986	92.2734	80.206	4.50864e-08	4.56741e-06	0.249194	73.3027	63.3379	1
chr5_89441390_89441850_plus	0.00137487	0.0462447	0.157901	38.556	33.8287	7.81783e-10	2.28693e-07	0.285833	29.1164	24.9287	1
chr5_160272510_160272740_minus	0.000594961	0.029483	0.157568	47.2257	39.3171	1.90538e-05	0.000381068	0.1775	33.6986	30.0805	1
chr1_33346490_33347170_minus	0.00144337	0.0475893	0.156527	152.44	124.285	0.000246529	0.00258841	0.157044	109.263	100.177	1
chr15_69757870_69763640_plus	4.28e-05	0.00862928	0.155935	777.233	670.201	6.03891e-08	5.6151e-06	0.199841	590.056	535.821	1
chr11_188460_189350_minus	5.75e-05	0.0102453	0.155364	480.365	424.081	4.97382e-09	9.38358e-07	0.201591	315.604	284.607	1
chr3_155185750_155191590_plus	0.000213788	0.0185766	0.155354	860.69	717.667	4.38908e-07	2.39058e-05	0.185758	669.868	582.991	1
chr4_139031400_139031570_minus	2.46e-05	0.00724916	0.155264	28.6349	24.8519	1.9513e-06	7.0363e-05	0.150571	27.2877	25.5425	1
chr2_71471140_71477980_plus	0.000179519	0.0168257	0.155181	864.756	716.984	5.46877e-05	0.000851043	0.145601	670.641	612.814	1
chr15_79961850_79963360_minus	1.97e-05	0.00641856	0.154416	451.877	391.755	0.000177991	0.00202269	0.140675	300.593	278.66	1
chr12_98637970_98638140_minus	5.62e-05	0.010194	0.154188	31.5358	26.9537	5.8393e-07	2.91797e-05	0.163737	28.0521	25.3241	1
chr19_18488580_18490710_minus	0.000286207	0.0211903	0.154105	449.45	329.35	0.0381155	0.110567	0.0650009	392.623	380.644	1
chr5_89450450_89450810_plus	0.00116725	0.0425188	0.154049	39.1908	34.9838	4.56963e-07	2.46827e-05	0.231626	26.4384	23.4161	1
chr5_100800610_100801390_minus	0.000142864	0.0152282	0.153858	162.358	145.414	2.88853e-12	3.92286e-09	0.246527	127.667	114.899	1
chr19_14635730_14635980_minus	0.00065774	0.0311925	0.153216	50.6459	44.0093	6.89766e-08	6.25717e-06	0.227055	45.4233	39.3103	1
chr17_3911050_3911510_minus	0.00150374	0.0488083	0.15254	88.2073	70.0185	0.0436036	0.121883	0.0835537	71.5767	68.0667	1
chr15_79963530_79964660_minus	8.92e-05	0.0126855	0.152502	299.167	259.498	0.000575746	0.00487465	0.132712	205.512	191.731	1
chr10_45472340_45475290_plus	0.000145202	0.0152516	0.152226	428.27	360.356	0.000249301	0.00260938	0.137333	316.866	289.933	1
chr10_132625930_132628850_plus	5.76e-06	0.00412293	0.152154	329.459	254.308	0.0241132	0.0792262	0.059324	251.823	245.899	1
chr17_3911970_3913120_minus	0.000676314	0.0314145	0.152063	271.36	219.192	0.0216596	0.0731657	0.0892385	236.023	223.6	1
chr5_140216220_140221140_plus	0.000191054	0.0173943	0.151834	552.349	460.271	0.00471924	0.0236052	0.0953656	398.697	376.676	1
chr4_83552520_83553000_plus	0.000561584	0.0285064	0.15059	45.7193	37.7894	0.000566169	0.00481077	0.138892	32.4425	30.0782	1
chr19_50023390_50023800_minus	0.000424014	0.0250258	0.150578	78.4881	71.2616	1.72955e-07	1.20077e-05	0.214892	64.174	58.6276	1
chr22_21831240_21831770_plus	0.00030663	0.0218866	0.150265	36.6954	31.3287	0.000109378	0.00139728	0.152039	30.1808	28.2069	1
chrX_17689530_17691110_plus	3.5e-05	0.00838688	0.150179	140.429	122.748	2.07643e-11	1.42262e-08	0.225978	110.007	96.492	1
chr15_69766220_69775140_plus	0.000343121	0.0231729	0.149589	1512.28	1357.5	8.88961e-10	2.46214e-07	0.238327	1336.52	1200.14	1
chr21_37822460_37829140_plus	0.00019808	0.0176404	0.149506	2075.45	1776.91	3.14456e-14	2.04672e-10	0.260446	1648.61	1405.22	1
chr10_104321100_104321240_minus	0.000737128	0.0327068	0.149472	26.389	21.6505	2.09025e-06	7.46471e-05	0.195336	20.2397	18.1494	1
chr20_49295160_49296920_plus	0.000170695	0.0163039	0.148483	149.657	127.042	5.27544e-07	2.72558e-05	0.177208	117.958	108.945	1
chr4_40765270_40772190_plus	4.92e-05	0.00926256	0.148384	872.677	723.97	0.000124928	0.00154661	0.131364	584.211	534.016	1
chr2_174523480_174524050_minus	0.000505567	0.0272082	0.148206	145.69	120.81	0.0397941	0.114214	0.0773452	98.3795	96.0138	1
chr17_21249740_21251320_minus	0.000283505	0.0211441	0.148167	427.121	347.623	1.55271e-11	1.12291e-08	0.239775	369.037	319.393	1
chr6_24942250_24945730_plus	0.000391436	0.0239503	0.148143	666.96	578.683	1.40515e-10	5.90051e-08	0.241128	515.937	454.598	1
chr17_78995820_78995950_minus	0.000162482	0.0158116	0.14762	26.9725	22.2894	0.0364944	0.107262	0.0724372	21.3521	21.2046	1
chr6_158678550_158679060_plus	3.81e-05	0.00838688	0.14733	43.5193	36.2153	0.0253942	0.0823642	0.0768872	33.6	31.9954	1
chr5_10452740_10455140_plus	0.000147674	0.0152516	0.147224	312.883	255.977	8.25585e-05	0.00114209	0.146213	225.086	205	1
chr12_7917220_7917660_minus	0.000622105	0.0300564	0.146801	100.376	88.6667	2.39377e-10	8.7777e-08	0.257642	79.6644	69.223	1
chr16_3821940_3822230_minus	0.000773246	0.0333535	0.146767	76.033	63.4838	0.0285174	0.0897438	0.0921532	64.6699	61.5632	1
chr12_122863670_122863780_minus	0.000158225	0.0156505	0.14659	22.4807	19.0648	0.00153894	0.0100492	0.110268	18.0836	17.2069	1
chr10_97323080_97323810_minus	0.000192465	0.0173943	0.145158	167.266	144.514	9.12632e-11	4.16849e-08	0.233874	134.252	117.915	1
chr16_66204910_66205190_minus	0.000960225	0.0378419	0.14479	53.2844	45.8032	1.34502e-05	0.000299295	0.172532	37.8425	34.2115	1
chr20_1852720_1854010_minus	0.000638017	0.0304702	0.144554	334.943	276.521	0.00729614	0.0327114	0.0949691	250.789	234.798	1
chr4_83558340_83559070_plus	0.00035095	0.0231729	0.144291	74.4679	63.2431	0.000531404	0.00457057	0.127816	56.0438	52.6897	1
chr14_68913200_68913730_minus	8.14e-06	0.00505572	0.143945	108.747	91.5	4.12854e-07	2.27244e-05	0.144938	83.8863	77.6736	1
chr14_68929390_68930160_minus	0.000840591	0.0349432	0.143884	364.459	326.479	4.46388e-10	1.41728e-07	0.265782	304.403	260.692	1
chr9_112450900_112452130_plus	1.38e-06	0.00246416	0.143409	131.286	112.535	9.25932e-05	0.00123567	0.108374	91.5849	86.4322	1
chr2_70500130_70501080_minus	0.000106346	0.0135366	0.143372	220.705	193.44	0.00125464	0.00865744	0.109127	170.7	164.733	1
chr20_47750300_47751010_minus	0.000163645	0.0158116	0.142337	178.712	144.333	0.000976615	0.00723725	0.111223	122.51	114.409	1
chr20_1855450_1857340_minus	0.000808334	0.0341111	0.141905	436.585	358.884	0.00110151	0.0078742	0.11243	350.73	325.828	1
chr19_50004830_50005040_minus	2.31e-05	0.00701942	0.141653	49.2092	41.5972	8.27607e-06	0.000209194	0.133396	37.7644	35.6184	1
chr14_68914090_68914230_minus	0.000135074	0.015158	0.141331	28.9193	24.5394	0.00100456	0.00736721	0.112193	23.2055	22.0989	1
chr21_42302620_42304300_plus	0.000730399	0.0327068	0.141082	206.088	180.567	6.91449e-11	3.39732e-08	0.243043	151.219	131.053	1
chr15_79903120_79903460_minus	0.000139486	0.0152282	0.140119	95.5872	81.7037	0.0315108	0.0965384	0.0724248	56.9507	55.6322	1
chr5_140181950_140184040_plus	0.000138771	0.0152282	0.140108	247.905	211.819	0.000552014	0.00470739	0.118413	178.495	168.821	1
chr11_129824460_129826250_plus	0.000358727	0.0232213	0.139893	263.275	234.613	0.00793618	0.0347433	0.101081	164.079	159.347	1
chr15_63945760_63946070_minus	0.000852873	0.0352779	0.139741	86.7688	70.9583	1.64225e-05	0.000342828	0.162761	55.2616	49.0069	1
chr9_91412820_91414280_minus	0.000483596	0.0266397	0.139079	398.921	344.47	1.98026e-08	2.59076e-06	0.200908	289.523	256.044	1
chr22_42886490_42887990_minus	9.85e-06	0.00505572	0.139	402.848	331.245	5.55472e-10	1.6816e-07	0.17047	306.7	281.851	1
chr12_98636240_98636940_minus	3.5e-05	0.00838688	0.138556	159.567	137.468	4.38827e-07	2.39058e-05	0.145244	125.379	115.664	1
chr1_149881750_149883230_minus	0.000698655	0.0318467	0.13845	516.761	463.171	5.31578e-12	4.94417e-09	0.257498	390.342	336.63	1
chr4_40441400_40442150_minus	4.51e-05	0.00888575	0.138281	232.218	200.153	1.6288e-06	6.20876e-05	0.149258	166.466	154.389	1
chr1_59571840_59573200_plus	0.00131426	0.0451422	0.137426	147.851	132.942	8.81931e-09	1.39158e-06	0.2228	107.87	97.5885	1
chr1_115056290_115056600_minus	0.00115841	0.0425188	0.136942	104.121	93.1412	0.000328635	0.00323299	0.145621	63.3616	59.4092	1
chr3_112520540_112520800_minus	0.000297538	0.0217141	0.136663	54.4367	49.0602	5.42521e-07	2.77134e-05	0.174654	39.4205	36.9701	1
chr18_62950310_62951060_plus	0.000272369	0.0208083	0.136631	73.1321	63.1574	1.8649e-05	0.000375827	0.148744	50.8699	46.8805	1
chr3_155119700_155133620_plus	0.000512133	0.0273652	0.136577	3252.48	2760.58	0.000818965	0.00633445	0.119098	2095.04	1908.33	1
chr6_41694020_41695500_minus	0.000140795	0.0152282	0.13647	478.246	361.625	0.000122485	0.00152798	0.102481	387.327	368.848	1
chr12_64730160_64731200_plus	0.000115767	0.0138615	0.136369	90.7651	79.3102	7.47864e-07	3.52091e-05	0.16176	78.4027	71.7586	1
chr18_62953220_62954010_plus	0.000307176	0.0218866	0.13631	78.9835	68.7986	0.000340983	0.00332284	0.119486	58.9041	55.2805	1
chr9_114393520_114393650_minus	0.000109752	0.0135967	0.135726	28.6404	24.5255	0.00505112	0.0248359	0.0890631	22.4315	21.731	1
chr3_72081680_72081940_minus	0.00061622	0.0300018	0.13541	55.989	46.4954	0.0449999	0.124848	0.0737155	41.6616	41.269	1
chr20_1850950_1852510_minus	0.00130229	0.0448897	0.135171	404.624	337.498	0.02802	0.0886177	0.0757235	283.915	268.703	1
chr1_234964860_234965690_minus	0.000670625	0.0314145	0.135164	173.596	147.794	6.959e-08	6.29088e-06	0.190354	132.371	116.949	1
chr18_77000510_77001090_minus	1.21e-05	0.00555715	0.13478	111.73	95.0972	2.45396e-07	1.53663e-05	0.144784	88.674	82.6368	1
chr3_48515450_48515720_minus	0.00136418	0.0460049	0.13465	48.4495	40.713	1.52577e-06	5.92003e-05	0.176791	38.0438	34.5425	1
chr11_72745840_72746360_minus	4.72e-05	0.00904533	0.134349	125.305	103.838	6.19505e-05	0.00093015	0.118138	91.9342	86.1724	1
chr16_66199170_66200310_minus	0.000543906	0.0281391	0.133897	293.78	255.12	1.99979e-06	7.17141e-05	0.173105	198.207	179.699	1
chr5_89447000_89448430_plus	0.00155847	0.0498094	0.133568	129.044	115.352	7.17117e-11	3.4408e-08	0.241476	110.437	97.5011	1
chr1_161009070_161009200_minus	0.000279253	0.0211127	0.133349	28.4312	24.6435	0.000113733	0.0014437	0.131461	20.9384	20.0069	1
chr14_73328610_73331380_minus	4.08e-07	0.00170277	0.132789	740.701	630.641	1.92562e-07	1.30556e-05	0.118503	575.904	538.306	1
chr2_70509170_70510080_minus	0.000436633	0.025411	0.131834	258.086	224.016	0.0025398	0.0146974	0.101532	159.923	152.455	1
chr11_118244930_118248200_minus	1.01e-05	0.00505572	0.131794	1164.75	1006.4	3.01353e-12	3.92286e-09	0.183016	883.008	808.207	1
chr10_73850730_73851180_minus	3.2e-05	0.00818612	0.13143	92.9872	79.2176	5.46859e-05	0.000851043	0.12362	72.7452	67.8437	1
chr14_94412960_94423230_plus	0.000591571	0.0294315	0.131201	1680.74	1484.18	3.11968e-08	3.5009e-06	0.184488	1317.89	1182.71	1
chr15_63944580_63945340_minus	0.000683074	0.0314504	0.131082	182.261	147.104	0.000688359	0.00556089	0.112273	128.548	118.508	1
chr10_30853410_30853690_minus	0.00012032	0.0140047	0.129433	55.0532	47.7338	0.0181641	0.0643929	0.0801666	34.9027	34.0253	1
chr11_9161960_9162110_minus	0.000768483	0.0332721	0.129402	34.1101	29.6852	0.000211054	0.00230101	0.138905	22.7	21.3218	1
chr20_47748670_47749030_minus	0.0012895	0.0445715	0.129322	78.2275	63.9306	3.44807e-05	0.000597275	0.145148	58.0438	52.4943	1
chr15_63942470_63943050_minus	0.00131506	0.0451422	0.129233	126.042	102.201	0.00099386	0.007328	0.116921	91.289	84.1678	1
chr5_91182130_91183540_minus	0.000416128	0.0247943	0.129133	288.204	253.007	7.77672e-05	0.00110036	0.128987	217.237	201.492	1
chr6_134217410_134217980_minus	0.000710298	0.0322014	0.128938	121.527	106.713	5.2127e-08	5.01289e-06	0.188336	87.9151	79.8414	1
chr1_21330380_21331170_minus	0.000304358	0.0218866	0.128577	173.033	139.998	0.000110405	0.00140808	0.119312	149.259	139.12	1
chr10_48799320_48799960_plus	0.00112731	0.0422319	0.128134	61.3156	52.831	0.00381471	0.0201004	0.108334	35.4233	33.8	1
chr8_28760400_28760860_plus	0.000665843	0.0312831	0.128006	44.2073	37.6898	0.0227854	0.0759076	0.0912204	23.0863	21.7747	1
chrX_17712860_17714440_plus	0.000357144	0.0232213	0.127993	166.925	146.718	8.45364e-08	7.28777e-06	0.17231	117.625	105.478	1
chr11_72742720_72743340_minus	1.51e-05	0.00591068	0.127721	163.36	135.488	1.06158e-06	4.51607e-05	0.126507	112.516	106.122	1
chr20_47748220_47748540_minus	0.00120346	0.043521	0.127531	76.9615	63.2222	2.44528e-07	1.53663e-05	0.184703	58.1493	51.8966	1
chr14_73326300_73327020_minus	0.000173905	0.0164411	0.127345	152.376	129.331	1.8491e-05	0.000374349	0.125009	119.659	110.828	1
chr20_60110790_60111780_plus	0.00033114	0.0228286	0.126859	95.6165	79.5278	0.0194964	0.0679503	0.0727289	65.8726	61.5011	1
chr7_127983330_127986100_minus	0.000811584	0.0341343	0.126611	890.727	782.847	9.63054e-07	4.2069e-05	0.163949	693.632	633.257	1
chr7_42906090_42906310_minus	0.00090218	0.0365324	0.126592	41.9688	37.0116	1.55515e-05	0.000329979	0.146004	31.3233	28.9494	1
chr14_75460320_75460730_plus	0.000197682	0.0176404	0.1264	104.598	90.6921	6.40592e-06	0.000172648	0.147978	77.7616	71.0713	1
chr2_70501230_70502210_minus	0.000365115	0.0232904	0.125345	243.119	211.289	0.00622674	0.0289539	0.0886649	158.477	151.894	1
chr1_21341730_21343530_minus	0.00035744	0.0232213	0.125075	402.29	325.968	1.16936e-05	0.000269181	0.12545	329.434	309.963	1
chr5_91177110_91178380_minus	0.000952727	0.0377247	0.124859	388.714	338.37	0.000783288	0.00611935	0.116223	245.567	228.379	1
chr11_126418170_126419370_plus	0.000475853	0.0265356	0.124783	122.82	104.975	0.00146231	0.00969228	0.106157	83.1274	78.6966	1
chr11_72744260_72744590_minus	0.000154083	0.0154237	0.124772	67.8202	55.9468	1.54549e-06	5.96984e-05	0.142227	45.2973	41.7448	1
chr22_42898390_42898880_minus	0.000408529	0.0245519	0.124733	110.409	93.9213	0.000274599	0.00281381	0.118993	81.5589	76.2989	1
chr1_21315880_21316270_minus	0.00131684	0.0451422	0.124399	87.8367	70.1458	0.00204985	0.0124749	0.0945274	75.7329	72.1655	1
chr22_21823450_21825280_plus	0.000642559	0.0306287	0.124124	198.383	173.826	1.08743e-05	0.000257141	0.147031	155.725	148.703	1
chr19_56112210_56112760_minus	8.5e-05	0.0123849	0.124019	122.295	100.56	0.0146734	0.0552934	0.0724861	86.8986	85.2299	1
chr17_45426450_45427090_minus	0.00133708	0.0454007	0.124009	164.393	129.63	0.000689441	0.00556577	0.113496	140.344	132.062	1
chr6_30809390_30809920_minus	0.000735105	0.0327068	0.123871	137.185	121.796	0.000315844	0.00314335	0.138446	98.0973	94.2966	1
chr20_32471530_32472220_minus	0.000324023	0.022701	0.123845	127.108	101.586	0.0490216	0.133056	0.0534909	109.208	109.324	1
chr6_136716170_136716330_minus	0.000150514	0.0153027	0.123458	33.8147	29.169	0.0119511	0.0474527	0.069764	26.7493	25.9954	1
chr20_47695190_47696340_minus	0.000540969	0.0281391	0.123377	220.407	179.975	1.38356e-05	0.000305522	0.12831	178.516	163.354	1
chr1_51664270_51664510_plus	0.00113864	0.042425	0.123323	16.9798	14.7292	0.0444471	0.123617	0.0748462	12.3658	12.0276	1
chr11_72746470_72746840_minus	0.000102515	0.0133899	0.123049	93.6642	78.2824	5.69538e-07	2.87363e-05	0.140511	71.426	66.7149	1
chr14_91207080_91208290_plus	0.00127242	0.0445049	0.121878	107.956	91.0162	0.000798037	0.00620391	0.110615	100.204	94.8483	1
chr17_44114490_44115020_minus	0.000716921	0.0323844	0.121872	112.561	92.1412	7.36337e-08	6.61053e-06	0.160293	87.6877	80.2943	1
chr15_42488160_42488880_minus	0.000224244	0.0188869	0.121421	183.167	164.264	6.25591e-09	1.10798e-06	0.186238	151.175	137.772	1
chr22_21748360_21748840_minus	0.000184816	0.0170038	0.121091	101.648	89.8588	3.41467e-09	6.94538e-07	0.180175	72.5562	66.6161	1
chr20_20441140_20441380_minus	0.000553138	0.0282495	0.120903	39.8018	34.5926	0.00608819	0.0285012	0.0821269	29.7274	28.5793	1
chr5_100572780_100575170_plus	2.87e-06	0.00373377	0.120854	305.334	269.007	8.1998e-07	3.75188e-05	0.120319	198.467	186.232	1
chr12_98642130_98643600_minus	0.000248096	0.0201512	0.120588	361.662	318.606	7.89759e-14	3.4269e-10	0.214464	269.593	236.979	1
chr1_12145230_12150180_plus	0.000263709	0.0206057	0.120421	484.62	419.875	5.06123e-08	4.95373e-06	0.16452	399.367	365.657	1
chr17_68437040_68437890_plus	7.83e-05	0.0120262	0.120401	74.233	65.588	0.000512617	0.00445163	0.0943912	57.0671	54.5057	1
chr11_59756210_59769850_plus	1.6e-05	0.00591068	0.119877	7139.64	6172.75	2.0115e-13	6.13004e-10	0.177038	5060.73	4624.07	1
chr8_89888970_89889250_minus	5.31e-06	0.00412293	0.119674	77.8183	69.4537	2.97569e-05	0.000533085	0.107844	60.6616	58.2621	1
chr12_98641690_98642000_minus	0.000542798	0.0281391	0.119605	87.0881	76.1574	3.06267e-10	1.04917e-07	0.193292	64.0616	57.3333	1
chr20_20608110_20608230_minus	0.000317444	0.0224031	0.118572	25.6477	22.088	0.00710158	0.0320599	0.09323	14.1945	13.6621	1
chr2_201034280_201042450_minus	4.16e-05	0.00854193	0.117487	3618.3	3181.22	1.25441e-06	5.15121e-05	0.119823	2429.4	2297.73	1
chr10_79189340_79196080_plus	0.000944165	0.0375043	0.116969	1012.4	789.479	0.0410665	0.116887	0.0531624	806.605	800.085	1
chr4_139033580_139037400_minus	3.91e-08	0.000728673	0.116941	1356.77	1202.95	2.06077e-12	3.35325e-09	0.143758	1060.04	998.005	1
chr11_14892820_14896380_plus	0.000207323	0.0181408	0.115009	318.156	281.556	3.9281e-11	2.22322e-08	0.177983	220.855	201.223	1
chr17_44113310_44114070_minus	0.000552805	0.0282495	0.114693	155.02	124.961	1.29671e-05	0.000291284	0.118293	119.996	112.418	1
chrX_120452800_120454340_minus	2.87e-05	0.00774954	0.114154	371.273	331.102	6.6695e-11	3.39732e-08	0.160594	274.226	252.501	1
chr8_61696460_61697370_minus	0.00067662	0.0314145	0.114098	208.582	184.794	0.0122055	0.0481836	0.0843729	133.818	126.632	1
chr12_49200000_49205000_plus	0.000253993	0.0203072	0.114087	566.497	508.988	7.16161e-15	8.20847e-11	0.222329	449.159	397.933	1
chr6_35852010_35853230_minus	0.000809669	0.0341111	0.113784	272.743	234.28	0.022037	0.0740282	0.0695501	203.549	195.805	1
chr8_140545430_140546260_minus	0.000527144	0.0278091	0.113674	154.288	126.185	0.000992442	0.00732376	0.0939865	111.218	106.954	1
chr14_73369850_73370170_minus	0.000734503	0.0327068	0.113324	67.8477	59.7731	0.0165093	0.0602232	0.0738767	47.0151	45.2575	1
chr1_59569550_59571650_plus	0.000108148	0.0135967	0.113217	210.272	190.095	1.38512e-07	1.02739e-05	0.149898	155.712	145.393	1
chr20_20690640_20691100_minus	0.000691136	0.0316756	0.11257	138.15	122.616	0.0105007	0.0431005	0.082604	71.3521	70.846	1
chr4_83545800_83547140_plus	0.000658127	0.0311925	0.112478	130.42	112.354	2.33528e-06	8.0796e-05	0.148747	93.9342	85.5264	1
chr17_64830410_64830840_minus	0.000260096	0.0204682	0.112088	106.506	91.1528	0.0338328	0.101514	0.0583985	68.274	66.5701	1
chr4_184357830_184359140_minus	0.0005439	0.0281391	0.111908	284.24	253.84	3.63309e-08	3.95764e-06	0.160649	211.448	196.938	1
chr11_12174260_12178670_plus	0.00104779	0.0399711	0.111833	1056.28	876.387	0.0208382	0.0712065	0.0675714	669.223	641.88	1
chr9_112446110_112448260_plus	3.79e-05	0.00838688	0.11169	297.494	259.174	2.32316e-07	1.4752e-05	0.128545	197.821	184.32	1
chr8_141222370_141227140_minus	0.000583468	0.0291715	0.111217	1871.2	1571.29	1.41075e-05	0.000310735	0.120715	1394.71	1289.31	1
chr4_159307570_159310360_plus	0.000103343	0.0133899	0.111092	463.042	414.141	1.74351e-06	6.51253e-05	0.118965	315.488	300.131	1
chr1_231404040_231408070_minus	5.8e-05	0.0102453	0.11068	1873.52	1622.84	1.16038e-05	0.000267824	0.100978	1233.55	1171.54	1
chr6_17891840_17892300_minus	0.000740411	0.0327943	0.110611	114.917	99.6667	6.777e-06	0.00017936	0.135108	80.9589	76.2092	1
chr19_16363170_16367090_minus	0.000344259	0.0231729	0.11017	1003.5	799.315	0.00312081	0.0172214	0.0679394	821.045	799.92	1
chr6_110819340_110819980_plus	0.000613742	0.0300018	0.10965	55.7358	48.6991	0.000963795	0.00716312	0.10041	41.2699	39.2023	1
chr16_3852610_3853190_minus	2.39e-06	0.00332948	0.109575	135.294	115.032	0.000421222	0.00387509	0.0774108	108.574	105.954	1
chr17_82987470_82989020_minus	0.00106834	0.0405693	0.109467	453.879	379.81	0.0374055	0.109141	0.0596829	321.718	311.329	1
chr1_33340930_33346150_minus	0.0012545	0.0445049	0.109296	4506.27	3802.15	0.000372447	0.00353634	0.109824	3192.76	2972.95	1
chr1_116562330_116563030_minus	4.22e-05	0.00859279	0.109208	186.912	155.185	0.011723	0.0467681	0.0580026	134.688	131.646	1
chr22_35315170_35316630_plus	0.000427497	0.025172	0.109203	166.031	137.912	0.0278056	0.0881217	0.0660344	124.138	119.74	1
chr14_92691950_92696970_plus	0.000681134	0.0314504	0.108559	910.207	729.421	0.00952629	0.0400479	0.0711342	774.182	758.68	1
chr22_42895480_42897260_minus	4.79e-05	0.00908805	0.108462	566.739	485.097	4.33907e-08	4.45539e-06	0.124072	401.434	374.324	1
chr11_78256430_78257040_minus	0.0011517	0.0425188	0.108371	208.2	182.199	1.08444e-08	1.67061e-06	0.15601	176.463	161.795	1
chr3_32478020_32478640_minus	0.000106562	0.0135366	0.108299	143.27	124.866	2.5166e-07	1.56746e-05	0.129335	105.234	99.2552	1
chr6_136553420_136554040_minus	0.000277652	0.0210553	0.108006	169.769	153.722	2.12589e-08	2.68678e-06	0.146671	113.223	106.738	1
chr1_156496420_156498550_minus	0.00024502	0.020038	0.107884	767.187	615.359	8.73702e-07	3.895e-05	0.114265	547.196	521.982	1
chr11_72743450_72744110_minus	0.000721248	0.0325211	0.107211	174.308	145.06	6.01221e-07	2.98493e-05	0.14598	124.726	116.103	1
chr2_96245750_96246290_minus	0.00094197	0.0374766	0.107052	103.793	89.0347	1.0233e-05	0.000245579	0.131267	84.6068	78.5356	1
chr10_29676630_29677300_minus	0.000448619	0.0259277	0.106953	153.483	131.833	5.48376e-05	0.000852866	0.117405	104.344	98.2046	1
chr1_151690170_151691410_plus	0.000215513	0.018619	0.106868	123.879	108.711	3.38928e-05	0.000589839	0.109453	97.1959	92.3816	1
chr11_72746960_72749680_minus	0.000218218	0.0187018	0.106849	654.857	559.609	7.76896e-10	2.28693e-07	0.154892	506.107	467.508	1
chr11_72749950_72751680_minus	0.00122449	0.0440905	0.106695	413.035	356.299	6.95457e-12	5.6582e-09	0.201106	315.458	284.113	1
chr2_239262470_239263240_minus	0.000802958	0.0340577	0.106588	166.877	142.201	9.66979e-05	0.00127084	0.113167	119.984	114.582	1
chr6_17864540_17865180_minus	0.00124174	0.0443922	0.106118	127.958	110.824	2.99818e-09	6.34614e-07	0.165446	101.736	92.7793	1
chr8_61708940_61710330_minus	0.00112529	0.0422196	0.106073	334.426	295.389	1.4131e-05	0.000310989	0.139558	236.27	217.618	1
chr20_56429900_56436300_plus	3.92e-05	0.00838688	0.105806	1593.36	1383.27	7.34035e-09	1.21724e-06	0.125825	1176.97	1101.83	1
chr15_79903640_79905080_minus	0.000682024	0.0314504	0.10564	483.96	427.181	5.7464e-06	0.000159268	0.127371	285.434	270.269	1
chr4_184362170_184362740_minus	0.00132787	0.0452617	0.105473	150.549	134.556	4.84161e-06	0.000139437	0.146298	89.837	84.4713	1
chr14_68918950_68920460_minus	0.000568403	0.0287359	0.104576	373.283	323.016	1.58413e-05	0.000334492	0.113581	260.736	246.234	1
chr14_92697130_92699600_plus	0.000491012	0.026764	0.104563	362.866	310.91	0.000250446	0.00261442	0.0982429	316.304	306.692	1
chr11_78257150_78260870_minus	0.000547248	0.0281788	0.103866	995.382	857.164	1.62101e-09	3.87184e-07	0.145977	781.738	717.8	1
chr13_25281190_25281320_minus	0.000949212	0.0376451	0.10382	27.5761	23.1528	0.000203111	0.00223878	0.116456	21.889	20.8483	1
chr16_67472920_67473530_minus	0.00155089	0.0496935	0.103762	118.261	102.03	1.34086e-06	5.41228e-05	0.147551	106.059	98.6644	1
chr6_158668330_158672590_plus	0.000103488	0.0133899	0.103469	555.872	477.882	0.000118797	0.0014945	0.0963253	373.889	353.184	1
chr11_3010500_3010740_minus	0.00154354	0.0495218	0.102762	61.8807	52.8657	0.00016743	0.00192754	0.1215	41.6795	39.8897	1
chr17_51050270_51050870_minus	0.000434291	0.0253336	0.102679	163.62	146.836	9.73553e-07	4.24564e-05	0.128826	100.378	94.2621	1
chr14_102388990_102399890_plus	0.000864594	0.0355279	0.102069	1865.49	1639.99	1.45471e-07	1.06386e-05	0.141543	1465.69	1356.12	1
chr14_73327230_73327880_minus	0.000869351	0.0356064	0.101423	155.024	135.382	2.18941e-07	1.43061e-05	0.148543	109.989	101.23	1
chr22_38268510_38269190_minus	0.000768244	0.0332721	0.0996778	135.141	117.833	4.87127e-07	2.56728e-05	0.141294	95.5192	89.0575	1
chr5_95075540_95079600_minus	0.0015362	0.0494548	0.0987208	1251.81	1118.12	1.74342e-06	6.51253e-05	0.133407	910.397	866.43	1
chr13_32113070_32115580_plus	0.000342457	0.0231729	0.0986292	390.468	344.562	1.55441e-06	5.99542e-05	0.119798	283.916	266.457	1
chr17_30401360_30416350_plus	4.37e-05	0.00868896	0.0975148	3550.46	3126.04	1.2837e-05	0.00028961	0.0973328	2080.47	2000.51	1
chr20_60158300_60163400_plus	0.000635462	0.0304062	0.0968148	547.479	478.188	0.000132155	0.00161609	0.0959185	389.237	366.136	1
chrX_21943700_21944450_plus	0.000693351	0.0316756	0.0967847	65.4697	57.5116	0.026592	0.0852356	0.0617735	41.3041	41.1586	1
chr11_9162320_9163270_minus	0.000930398	0.0370752	0.0964027	188.563	164.958	1.68725e-05	0.000349463	0.113862	150.416	142.046	1
chr4_37892180_37900930_plus	0.000544228	0.0281391	0.0961855	1756.28	1575	1.82399e-08	2.44782e-06	0.139382	1250.73	1166.98	1
chr15_90416300_90422510_plus	0.0015197	0.0490716	0.0960993	1265.92	1068.55	0.0349188	0.103946	0.0524361	829.108	807.149	1
chr20_20548620_20555640_minus	2.57e-05	0.0073044	0.0954095	2084.72	1842.76	4.82097e-05	0.000771918	0.088083	1580.72	1528.55	1
chr4_159189860_159192530_plus	0.000757795	0.033038	0.0952194	433.24	386.977	1.4684e-05	0.000318847	0.107654	277.707	267.513	1
chr2_159486900_159488480_minus	0.000408181	0.0245519	0.0942517	444.552	395.669	0.000228626	0.00244347	0.0901869	278.299	267.032	1
chr10_104318910_104320650_minus	0.000992294	0.0389219	0.0942215	662.341	577.815	6.27041e-11	3.33164e-08	0.169576	479.345	436.092	1
chr12_100136600_100140490_minus	1.39e-05	0.0056182	0.0937611	1548.4	1365.51	4.42119e-12	4.65618e-09	0.139109	1043.17	974.244	1
chr1_176187450_176189690_minus	0.0001194	0.0139626	0.0933743	684.057	588.019	0.0061575	0.0287347	0.0582392	420.144	411.462	1
chr16_3861820_3863070_minus	0.000255004	0.0203232	0.093057	341.009	297.843	0.00140812	0.00943861	0.0710732	260.462	253.248	1
chr6_17869100_17872000_minus	0.000920688	0.0369234	0.0928983	812.525	724.373	1.16334e-08	1.75073e-06	0.141701	606.873	564.356	1
chr8_22610580_22610920_minus	0.0010263	0.0395733	0.0928432	64.9266	59.8287	2.8514e-07	1.72642e-05	0.131114	55.3658	52.708	1
chr17_42372490_42373070_minus	0.00128328	0.0445715	0.0926713	141.972	127.377	0.000177452	0.00201833	0.0990207	103.53	98.9448	1
chr9_125179950_125180090_minus	0.00126335	0.0445049	0.0925795	36.7248	33.5764	0.0171362	0.0617325	0.0748019	23.963	23.7011	1
chr6_136564910_136565350_minus	0.000496973	0.0268987	0.0923212	88.9193	79.1343	0.000319259	0.00317124	0.0874236	67.3712	66.0552	1
chr6_53252570_53253180_minus	0.000682015	0.0314504	0.0923048	158.728	144.512	0.000271844	0.00279299	0.0929075	127.567	124.701	1
chr14_96949190_96951810_plus	0.00102174	0.0394583	0.0913405	289.376	262.333	0.00010643	0.0013684	0.110224	202.61	197.687	1
chr20_60165400_60172480_plus	0.00140805	0.0469193	0.0904183	762.872	674.826	4.94988e-05	0.000787233	0.103915	577.873	538.933	1
chr13_32106210_32112930_plus	0.000382665	0.0236449	0.089711	1362.97	1214.72	2.33471e-07	1.47545e-05	0.116632	964.04	910.198	1
chr1_15869890_15871090_plus	0.000353081	0.0232213	0.0893472	102.809	90.8981	8.36789e-05	0.00115269	0.0938864	75.5137	72.9172	1
chr17_51051710_51052050_minus	0.00115431	0.0425188	0.0892566	98.1725	88.331	2.0809e-09	4.67036e-07	0.154394	66.6315	61.7195	1
chr4_139468640_139470070_plus	0.000126819	0.0144916	0.089026	144.385	130.954	0.0242408	0.0795247	0.0542746	97.7918	96.4644	1
chr17_62624520_62626370_plus	0.000838147	0.0348995	0.0888474	172.231	155.514	3.02376e-09	6.34868e-07	0.155106	128.899	118.834	1
chr10_92990350_92992480_plus	6.81e-05	0.0111295	0.0888276	239.624	210.701	4.78667e-05	0.000767972	0.0841159	182.366	177.287	1
chr5_150789110_150790770_plus	0.000379967	0.0235947	0.0887407	160.853	141.644	3.20173e-05	0.000565516	0.0989771	119.99	113.244	1
chrX_120451930_120452640_minus	0.00149259	0.0486989	0.0885412	197.901	181.44	5.30897e-13	1.06322e-09	0.190762	152.589	138.614	1
chr15_42485210_42485700_minus	0.00153547	0.0494548	0.0883878	120.457	107.375	1.64156e-07	1.15003e-05	0.141026	91.7315	86.1724	1
chr22_42830220_42830490_minus	0.00125329	0.0445049	0.0879809	54.2349	47.8032	0.00231872	0.013692	0.0817175	37.6644	36.4483	1
chr5_80412710_80418030_plus	0.000307259	0.0218866	0.0878011	1274.18	1109.59	0.00452111	0.022878	0.0600866	877.763	848.853	1
chr6_53251170_53252340_minus	0.000428819	0.0251906	0.0873733	256.897	229.618	5.81708e-09	1.04447e-06	0.127104	188.595	179.455	1
chr6_87679850_87680740_minus	0.000156299	0.0155214	0.0867737	249.719	224.104	5.42877e-07	2.77134e-05	0.108938	189.677	179.736	1
chr6_110793360_110794040_minus	0.000192536	0.0173943	0.0866356	185.506	164.847	5.15102e-05	0.000811309	0.0927658	114.666	109.508	1
chr14_77518740_77519150_minus	0.000734069	0.0327068	0.0858494	101.35	89.9051	0.00294614	0.0164749	0.0776472	70.474	68.2529	1
chrX_24489260_24491730_plus	0.0010448	0.0399235	0.0849514	221.906	197.014	3.37686e-06	0.000106308	0.107154	170.938	163.076	1
chr11_45958530_45962640_minus	0.000379717	0.0235947	0.0848574	1489.09	1333.55	0.00742191	0.0331383	0.0583355	1029.95	1011.76	1
chr2_159505090_159509140_minus	0.000972122	0.0382505	0.084508	1774.36	1613.55	0.000907855	0.00683122	0.074005	1179.31	1139.55	1
chr11_45994190_46014720_minus	0.000281131	0.0211441	0.0844772	11346.9	10134.2	0.032381	0.0984267	0.0468032	7704.81	7598.04	1
chr12_7013660_7014250_minus	0.000219984	0.0187062	0.0839238	147.035	134.081	0.00528032	0.0256671	0.0630468	101.422	101.232	1
chr2_25330850_25331780_minus	0.00132311	0.0452302	0.0838866	193.578	167.171	0.0011803	0.00825385	0.0678884	141.903	141.145	1
chr12_100129670_100130390_minus	0.00145833	0.0478306	0.0838248	175.277	153.998	1.92712e-06	6.9781e-05	0.112996	124.184	116.637	1
chr12_100134050_100135700_minus	0.000376039	0.0235849	0.0832254	429.36	376.947	6.55191e-08	6.02753e-06	0.115682	306.77	292.145	1
chr10_132652170_132664930_plus	2.19e-05	0.00685422	0.0831341	3961.36	3513.11	2.51508e-06	8.51439e-05	0.0900701	2978.8	2877.89	1
chr16_3856430_3859400_minus	0.000103022	0.0133899	0.0829038	911.2	788.206	0.0006109	0.00508508	0.0526697	649.529	642.906	1
chrX_19822520_19824200_minus	0.000129049	0.0146129	0.0827261	610.818	535.421	0.000577812	0.00488773	0.0631297	467.799	451.977	1
chr16_3860760_3861650_minus	0.000801281	0.0340442	0.0822093	230.928	202.317	0.00087629	0.00665332	0.0650333	171.329	166.883	1
chr12_31702730_31703930_minus	0.000481493	0.0266397	0.082046	306.299	280.701	3.9864e-09	7.80345e-07	0.136726	218.5	208.03	1
chr6_110806670_110808630_minus	0.000350458	0.0231729	0.0816037	638.464	568.456	1.73035e-12	3.00331e-09	0.136549	444.386	415.189	1
chr17_42378140_42381520_minus	0.00111114	0.041814	0.081594	1377.66	1261	5.18529e-09	9.61726e-07	0.138901	1043.87	979.786	1
chr11_3783560_3784280_minus	0.000409948	0.0245519	0.0809009	180.409	164.796	1.05758e-07	8.42018e-06	0.112473	138.901	132.609	1
chr12_100132870_100133910_minus	0.000604441	0.0297759	0.0808506	246.495	217.593	1.72957e-09	4.0567e-07	0.135085	171.314	160.186	1
chr3_32473770_32475180_minus	0.00104444	0.0399235	0.0797228	344.789	302.873	1.78664e-07	1.23056e-05	0.115282	230.822	220.409	1
chr20_2104150_2111060_plus	1.61e-05	0.00591068	0.079722	1081.71	967.537	7.68388e-06	0.000197483	0.0764446	758.766	749.609	1
chr1_181015870_181016430_minus	0.000327145	0.0227411	0.0788672	181.525	165.711	8.25442e-07	3.7574e-05	0.106439	112.067	107.818	1
chrX_2497030_2499320_minus	0.000151527	0.0153027	0.0787002	775.547	687.248	1.89676e-07	1.28935e-05	0.0909335	604.467	569.883	1
chrX_9655070_9672460_plus	0.000151864	0.0153027	0.0786537	8838.43	7815.35	0.000228434	0.00244241	0.0653318	6146.43	6004.02	1
chr10_29704390_29707060_minus	0.00125739	0.0445049	0.0785023	683.73	613.31	0.00133113	0.00902735	0.0705904	614.526	593.929	1
chr14_50220490_50221870_minus	0.00115873	0.0425188	0.0785003	368.13	323.725	0.00285125	0.0160572	0.0648806	248.966	240.276	1
chr12_31723130_31728100_minus	0.000109391	0.0135967	0.0783792	1324.75	1211.25	3.05257e-08	3.45538e-06	0.104792	923.944	897.097	1
chr16_3799420_3801210_minus	6.11e-05	0.0105425	0.0782976	394.859	346.979	7.83398e-05	0.00110613	0.0701946	257.59	252.618	1
chr13_25281690_25283430_minus	0.000651278	0.0309853	0.077074	462.338	411.644	4.93595e-05	0.000785978	0.0891604	338.734	329.083	1
chr17_60651600_60653680_plus	0.000744201	0.0328258	0.0745941	215.125	194.262	5.3421e-07	2.74865e-05	0.1075	142.248	136.129	1
chr4_101084750_101085350_minus	0.00110516	0.0416514	0.0745348	129.259	115.155	0.00404744	0.0210413	0.0632631	92.0904	90.6667	1
chr20_62298350_62301580_plus	0.00123724	0.0443922	0.0737638	409.194	370.537	1.2897e-05	0.000290406	0.0908786	311.14	297.244	1
chr22_40293680_40296480_plus	0.000555833	0.0282718	0.072419	452.187	403.083	0.0120352	0.0476991	0.0430091	351.019	352.007	1
chr3_101734300_101737010_plus	0.00126074	0.0445049	0.0714886	257.699	237.167	4.77008e-05	0.000766599	0.0886008	188.021	182.667	1
chr3_119832780_119833420_minus	0.000479285	0.0266397	0.0713643	166.954	154.294	8.5276e-05	0.00116605	0.0767667	130.327	127.503	1
chr2_239251290_239254450_minus	0.00133471	0.0453818	0.0711263	1093.96	970.28	0.000776256	0.00608546	0.0668131	734.485	718.759	1
chr7_36865080_36866200_minus	0.00145415	0.0478187	0.0711029	288.837	269.484	9.90422e-07	4.29761e-05	0.099074	195.758	190.43	1
chr10_75135620_75139460_plus	1.97e-05	0.00641856	0.0704516	457.264	415.169	0.000130674	0.0016025	0.0615604	346.245	341.595	1
chr12_31720940_31722750_minus	0.000683677	0.0314504	0.0698949	416.165	377.394	2.02785e-08	2.61361e-06	0.111333	305.318	295.159	1
chr18_21046200_21047460_minus	0.000375125	0.0235849	0.0689459	318.745	293.072	5.33276e-06	0.000150258	0.0890308	221.499	215.977	1
chr16_3796860_3799260_minus	0.000121513	0.0140579	0.0662675	747.013	677.738	1.34421e-06	5.41741e-05	0.0751028	468.299	457.692	1
chr7_37262200_37263000_minus	0.0010519	0.0400666	0.0656844	176.464	162.292	0.00171626	0.0109169	0.0626722	109.108	108.048	1
chr1_181010450_181015660_minus	0.000103802	0.0133899	0.0651036	1352.63	1250.92	1.12866e-08	1.7184e-06	0.0939053	970.358	937.77	1
chr3_58340510_58349260_plus	0.00110352	0.0416514	0.0649469	1301.31	1162.8	2.96675e-08	3.40874e-06	0.0969654	914.411	874.179	1
chr11_2541460_2544190_plus	0.00143482	0.0474739	0.0644923	357.207	315.593	0.0309655	0.0951944	0.0378181	253.823	256.034	1
chr20_2112200_2114240_plus	0.000863619	0.0355279	0.0643461	218.934	200.317	0.000211621	0.00230525	0.069387	145.555	143.655	1
chr3_122488180_122490790_minus	0.000375946	0.0235849	0.0637241	619.998	561.877	0.00479539	0.0238884	0.0420259	456.293	454.837	1
chr7_36871180_36874340_minus	0.000118297	0.013959	0.0624306	873.262	797.778	7.76436e-05	0.00109921	0.0554014	649.97	644.529	1
chr16_69587970_69602930_plus	0.000147988	0.0152516	0.0617812	2430.3	2192.95	0.0294681	0.0919306	0.0312421	1676.74	1673.48	1
chr5_179756170_179760810_plus	0.00128919	0.0445715	0.0616877	567.055	521.708	1.85653e-06	6.7886e-05	0.0855422	427.697	415.444	1
chr1_51850270_51852340_minus	0.000736529	0.0327068	0.0590151	728.892	671.84	0.00209561	0.0126941	0.0496598	523.888	519.979	1
chr2_173921230_173923480_minus	0.000102897	0.0133899	0.0585758	742.635	670.794	0.000164569	0.00190506	0.0533644	495.963	490.775	1
chr7_37264460_37266630_minus	0.000612496	0.0300018	0.0571002	780.956	730.308	0.0151773	0.0566296	0.0384132	536.882	543.828	1
chr17_60519420_60523770_minus	0.00138095	0.0462607	0.0545442	1220.68	1134.28	3.54684e-05	0.000611536	0.0674967	845.19	845.23	1
chr7_112880760_112890330_minus	0.00030201	0.0218866	0.0473727	3741.38	3480.7	1.5074e-06	5.88384e-05	0.0560089	2634.47	2634.55	1
chr1_100944810_100954990_plus	0.00110432	0.0416514	-0.0452863	2246.07	2216.73	1.60542e-05	0.000338438	-0.0622197	1362.98	1473.95	1
chr15_75860680_75866630_plus	0.0015375	0.0494548	-0.0486921	728.171	717.882	0.000612238	0.0050909	-0.0513144	444.705	481.126	1
chr12_45230850_45249290_plus	0.000664906	0.0312831	-0.0507425	2844.22	2795.75	1.72474e-05	0.00035413	-0.0619429	1873.97	2001.78	1
chr18_79256520_79261300_plus	0.0011467	0.0424499	-0.0546	685.25	675.44	0.000299264	0.00300824	-0.0594649	434.659	462.88	1
chr12_45223440_45226510_plus	0.000216792	0.0186434	-0.0557651	496.488	485.535	0.00624342	0.0289901	-0.0468676	297.11	315.028	1
chr2_119832760_119839190_plus	0.00086419	0.0355279	-0.0581194	838.539	877.039	0.000172343	0.00196969	-0.0574969	556.207	610.244	1
chr3_33427200_33428180_minus	0.00023385	0.0194622	-0.0589061	252.028	244.616	0.00812379	0.0353614	-0.041686	168.922	181	1
chr6_126058590_126062990_plus	0.000373264	0.0235849	-0.0599939	419.156	422.002	0.00725192	0.0325636	-0.0429925	303.377	328.186	1
chr3_128166520_128169770_plus	0.000847872	0.0351874	-0.0604811	442.226	441.861	5.17687e-05	0.000814873	-0.0658323	291.385	314.099	1
chr3_119307110_119312970_plus	0.000584013	0.0291715	-0.0633192	615.848	599.799	0.000672939	0.00547157	-0.061451	474.144	502.545	1
chr11_35742870_35751810_plus	0.000147574	0.0152516	-0.0633294	2557.34	2594.47	0.0399005	0.114432	-0.0333525	1770.09	1910.69	1
chr14_68304270_68309950_plus	0.000872837	0.0356722	-0.0635127	576.947	587.171	0.000208036	0.00228069	-0.0659413	394.055	429.423	1
chr5_134942220_134945980_plus	0.000112459	0.0136616	-0.0636728	411.895	413.215	4.22938e-05	0.000699605	-0.0701068	274.533	296.648	1
chr8_116703220_116704580_minus	8.95e-06	0.00505572	-0.0640519	395.745	396.877	0.00433598	0.0221471	-0.040598	244.852	260.821	1
chr9_6952500_6962740_plus	0.000180336	0.0168392	-0.0646822	1587.87	1584.65	5.75912e-07	2.89715e-05	-0.0914495	1042.52	1154.79	1
chr10_63514860_63516800_minus	0.000262267	0.0205744	-0.0647662	438.699	441.56	0.00450234	0.0228047	-0.044921	321.915	346.011	1
chr13_79390350_79391830_minus	0.00103206	0.0397344	-0.0652058	606.136	610.463	0.00110395	0.00788732	-0.0617628	346.275	375.706	1
chr12_28340220_28344240_plus	0.00136509	0.0460049	-0.0662579	563.58	570.891	0.0126771	0.0495941	-0.0521195	360.905	392.032	1
chr9_6936010_6939770_plus	0.000919529	0.0369234	-0.0668929	625.101	624.104	1.14947e-07	8.95999e-06	-0.109572	387.341	432.871	1
chrX_41710310_41712590_minus	0.000449954	0.0259449	-0.0675355	484.257	501.231	0.00197845	0.012134	-0.0589537	375.421	411.28	1
chr1_101047480_101058920_plus	0.00149705	0.048748	-0.0677613	1669.04	1753.32	5.97056e-07	2.97785e-05	-0.102198	1157.66	1341.98	1
chr16_84719080_84724940_plus	3.56e-05	0.00838688	-0.0677949	804.675	809.194	5.10994e-07	2.66075e-05	-0.0779196	566.599	618.172	1
chr2_106114480_106115870_minus	0.000615044	0.0300018	-0.0682946	303.169	315.023	0.00644322	0.029722	-0.0553196	193.127	214.432	1
chr9_6766250_6768520_plus	0.000693636	0.0316756	-0.068575	251.002	252.623	0.0322996	0.0982727	-0.0441059	169.914	181.375	1
chr11_108731520_108738230_plus	0.000378359	0.0235947	-0.0687539	836.862	852.34	1.53824e-06	5.95068e-05	-0.0925666	542.958	608.609	1
chr4_113633160_113637210_minus	0.00155286	0.0496935	-0.0687553	1209.68	1247.8	0.000627267	0.0051877	-0.0700666	802.912	888.924	1
chr9_131998370_131999610_minus	6.32e-05	0.0106193	-0.0695204	261.602	264.852	0.0201461	0.0696088	-0.0378271	193.319	205.655	1
chr6_138909530_138910170_minus	0.000571655	0.028784	-0.0697545	139.934	143.289	0.0217943	0.0734518	-0.046921	94.5493	100.713	1
chr4_109619790_109633180_plus	0.000783677	0.0335814	-0.0701034	2274.07	2360.78	3.63464e-06	0.000112347	-0.0961498	1465	1651.4	1
chr20_48977460_48983250_plus	0.000284421	0.0211441	-0.0702027	866.127	875.262	6.03289e-05	0.000912645	-0.0817799	485.481	530.016	1
chr1_246209420_246211050_minus	0.000405198	0.0245519	-0.072119	377.02	386.525	1.77837e-05	0.000363706	-0.09972	260.468	286.062	1
chr14_67965410_67974730_plus	0.00114532	0.0424499	-0.072527	1816.93	1881.48	0.000868019	0.00661173	-0.0717342	1222.44	1344.96	1
chr3_105756570_105760160_minus	0.0013822	0.0462607	-0.0737803	1175.14	1201.4	0.0328165	0.0993116	-0.0448363	784.095	844.503	1
chr14_67940100_67953050_plus	0.000497667	0.0268987	-0.0741574	2198.12	2259.81	1.11102e-05	0.000260825	-0.103762	1394.29	1554.6	1
chr12_120005390_120008610_plus	0.00132936	0.0452617	-0.0745056	406.059	419.088	5.69507e-07	2.87363e-05	-0.105079	265.245	304.913	1
chr6_87644500_87645490_plus	0.00116588	0.0425188	-0.0745864	103.211	104.287	0.00095347	0.00710057	-0.0848505	61.8137	66.9977	1
chr1_77604750_77605370_minus	0.000417538	0.0248192	-0.0747082	153.547	153.574	2.85979e-05	0.000517766	-0.0927257	91.811	102.782	1
chr3_197239610_197240490_minus	0.000350327	0.0231729	-0.0753599	177.75	180.507	0.0158905	0.0584787	-0.0502787	111.592	120.051	1
chr6_158803700_158804500_minus	0.000891887	0.0362329	-0.0757041	228.508	226.562	3.50275e-06	0.000109603	-0.100402	145.8	164.457	1
chr14_68072310_68079400_plus	0.000624896	0.0301311	-0.0768627	1081.46	1100.29	0.000234515	0.00249412	-0.0964408	604.907	663.503	1
chr6_5505200_5507380_plus	0.00150905	0.0489171	-0.0772275	188.62	189.484	0.000728924	0.00579998	-0.077055	134.692	147.444	1
chr14_68097270_68113000_plus	0.000215764	0.018619	-0.0773596	2145.54	2222.12	6.67937e-05	0.000983027	-0.0932569	1422.38	1577.04	1
chr10_74260020_74265700_plus	0.000500987	0.0270198	-0.0776158	707.628	719.664	1.30116e-05	0.000292031	-0.0988674	427.192	476.292	1
chr14_67974840_67979680_plus	0.000357981	0.0232213	-0.0776442	722.613	736.463	8.94209e-07	3.96605e-05	-0.117923	473.575	532.333	1
chr4_109604400_109618690_plus	0.00118968	0.0430849	-0.0787726	3006.09	3150.03	2.29719e-05	0.000441057	-0.0970067	1911.08	2154.29	1
chr6_143632450_143644560_plus	0.000269291	0.0207354	-0.079064	2163.42	2144.58	1.11467e-07	8.79408e-06	-0.127888	1373.98	1548	1
chr11_108738500_108741130_plus	0.000527195	0.0278091	-0.0793285	256.363	257.852	1.50301e-06	5.8755e-05	-0.110161	156.233	175.949	1
chr6_20688470_20690040_plus	0.000708502	0.0321783	-0.0794035	193.895	198.706	0.0129307	0.0503216	-0.0609668	119.216	130.375	1
chr4_113706810_113709140_minus	0.000999152	0.0389467	-0.0798224	627.235	648.657	0.00120441	0.0083842	-0.0699948	435.914	483.913	1
chr1_101032940_101042040_plus	0.000111207	0.013642	-0.0804693	1873.97	1994.49	8.45686e-07	3.81585e-05	-0.0974932	1247.75	1440.83	1
chr11_6524100_6525690_plus	0.000176862	0.016639	-0.0806517	197.804	200.824	1.82999e-06	6.74259e-05	-0.0950594	138.953	153.237	1
chr12_28349160_28352170_plus	8.4e-05	0.012358	-0.0814002	375.349	381.91	1.56121e-05	0.000330994	-0.098159	238.927	263.575	1
chr4_113643290_113644020_minus	0.00105997	0.0403127	-0.0821171	195.859	201.169	0.00142448	0.00949696	-0.08105	129.599	143.297	1
chr16_84725380_84728280_plus	0.00102034	0.0394583	-0.0828859	353.303	357.273	0.000398588	0.00373245	-0.0781222	243.241	263.349	1
chr2_62011260_62013020_plus	0.000317606	0.0224031	-0.0832824	149.815	150.005	5.133e-07	2.66742e-05	-0.107713	109.974	121.246	1
chr13_73980690_73981440_minus	0.00043263	0.0252957	-0.0834079	185.33	190.37	8.9002e-05	0.00120594	-0.0968183	126.452	141.005	1
chr13_77318010_77318400_minus	0.000460898	0.0261541	-0.0837376	124.139	129.919	0.000886244	0.00670348	-0.0828572	71.1767	76.8759	1
chr7_92754220_92755350_minus	0.00143798	0.0474744	-0.0837866	231.971	243.634	0.00908295	0.0385728	-0.0617493	162.464	183.841	1
chr7_92667250_92667960_minus	0.000338842	0.0231049	-0.0838255	131.196	134.884	2.33246e-05	0.000446841	-0.101525	90.2233	103.982	1
chr14_91761410_91777060_minus	0.000475481	0.0265356	-0.0850917	7102.51	7417.99	0.00130723	0.00891012	-0.0740022	4593.02	5164.63	1
chr1_77605480_77607400_minus	2.93e-05	0.00774954	-0.0851275	451.695	460.113	1.00394e-05	0.000243594	-0.0838426	290.197	319.023	1
chr21_31698500_31698970_minus	3.14e-05	0.00817984	-0.0872635	112.76	113.076	2.79493e-07	1.70683e-05	-0.116003	70.311	78.0874	1
chr3_99865030_99870020_plus	0.000142749	0.0152282	-0.0877545	557.73	590.229	0.000135936	0.00164934	-0.090477	362.068	411.616	1
chr17_39768900_39770640_minus	0.00128097	0.0445715	-0.0880551	456.723	454.162	7.45267e-05	0.00106669	-0.0973139	280.644	315.706	1
chr7_24960490_24960970_minus	0.00117669	0.0427434	-0.0881377	90.8679	89.456	0.0415703	0.117832	-0.0548504	57.7986	62.354	1
chr8_120750190_120751970_minus	0.000455938	0.0261034	-0.0882206	366.991	369.438	0.00042347	0.00388893	-0.0855802	275.568	300.446	1
chr3_23228680_23240810_plus	0.000614259	0.0300018	-0.0883469	2296.94	2341.75	1.65514e-05	0.000344554	-0.112783	1354.42	1497.94	1
chr11_108217650_108217990_minus	0.00128753	0.0445715	-0.089186	87.4055	91.0162	0.0149289	0.0559645	-0.0657532	64.8671	70.2851	1
chr3_99824870_99826710_plus	0.00047061	0.0264652	-0.0898207	167.04	175.729	0.00103167	0.00751105	-0.0869367	114.226	128.729	1
chr3_156796250_156796780_minus	0.00134373	0.0455649	-0.0913844	96.8128	100.201	0.0455601	0.125969	-0.0539383	82.0877	88.7126	1
chr17_80913650_80917120_plus	0.00055135	0.0282495	-0.0916246	385.549	391.113	0.000105605	0.00136141	-0.101352	277.096	303.046	1
chr2_224951400_224952490_minus	9.81e-05	0.0133468	-0.0918129	299.033	313.558	1.12016e-05	0.000262024	-0.0969994	223.048	252.72	1
chr3_158724010_158724630_plus	0.00124795	0.0445049	-0.0926989	56.2587	56.0069	0.00152739	0.00999892	-0.0913669	35.1466	38.5057	1
chr7_43697530_43698080_minus	0.000107593	0.0135967	-0.093208	145.035	148.512	0.000247282	0.00259491	-0.0878696	78.5973	86.3264	1
chr5_37660320_37663110_plus	3.91e-05	0.00838688	-0.0934074	504.78	515.921	7.86186e-05	0.0011088	-0.0907944	331.019	365.586	1
chr2_181183030_181187710_plus	0.0014669	0.0479775	-0.0935547	589.262	616.542	0.0048006	0.0238975	-0.0793122	407.545	465.538	1
chr9_20538040_20542030_minus	0.00020484	0.0180497	-0.0940639	1104.29	1203.36	1.02692e-07	8.25177e-06	-0.139084	676.141	800.706	1
chr4_148327390_148328100_minus	0.00145213	0.0478152	-0.0948457	139.457	151.567	0.0146871	0.0552971	-0.0767084	92.637	105.543	1
chr3_99877660_99880510_plus	8.83e-05	0.0126743	-0.0949723	263.398	282.567	0.0167842	0.0609446	-0.0590876	180.114	202.175	1
chr3_99893910_99896720_plus	0.00023409	0.0194622	-0.0957091	269.048	284.657	0.000173599	0.00197995	-0.102998	169.9	192.476	1
chr3_99899560_99902020_plus	0.000601598	0.0297529	-0.0958671	209.158	225.093	5.6457e-05	0.000871285	-0.113933	138.993	161.31	1
chr14_68179760_68183330_plus	9.33e-05	0.0130426	-0.0964198	366.442	379.086	0.000227094	0.00243208	-0.0997873	234.479	258.014	1
chr8_127126000_127128260_plus	0.00134808	0.0456505	-0.096646	183.119	202.095	2.7262e-05	0.000500541	-0.121758	138.055	161.218	1
chr13_73979000_73979300_minus	0.000672338	0.0314145	-0.0974238	67.6844	69.8935	0.0362098	0.106776	-0.06023	43.7863	48.2368	1
chr8_79964110_79964300_minus	0.00127918	0.0445715	-0.0980378	35.222	36.75	0.00756026	0.0335432	-0.0775129	26.7671	29.4782	1
chr8_127052050_127055260_plus	0.000746535	0.0328258	-0.0984824	326.655	354.016	0.00470704	0.0235624	-0.0793048	220.41	249.545	1
chr17_80928510_80929500_plus	0.000101834	0.0133899	-0.0989094	124.143	127.873	0.00056456	0.00479867	-0.0894109	78.3959	86.1839	1
chr15_42375860_42377510_plus	0.00010875	0.0135967	-0.098944	167.308	169.493	0.0274698	0.0873231	-0.05412	103.555	110.611	1
chr3_99882080_99886000_plus	6.08e-05	0.0105425	-0.0991501	388.484	411.162	3.24932e-05	0.000571209	-0.10479	254.811	292.225	1
chr3_23339810_23343840_plus	0.000139251	0.0152282	-0.099325	670.783	694.303	7.28383e-05	0.00104944	-0.10984	436.455	485.536	1
chr1_89722620_89725210_plus	1.33e-05	0.00555715	-0.0993283	375.121	386.275	1.43961e-06	5.69144e-05	-0.103634	263.885	293.862	1
chr16_81003780_81004030_minus	0.000360908	0.0232213	-0.0995322	46.7138	47.25	0.0231912	0.0769444	-0.0610568	35.6151	38.492	1
chr18_63143400_63148280_minus	0.000272732	0.0208083	-0.0998966	1229.37	1295.42	6.77763e-06	0.00017936	-0.11074	872.953	1008.47	1
chr8_120744930_120746240_minus	0.000304005	0.0218866	-0.1003	361.917	366.794	0.00044605	0.00402667	-0.0902995	232.119	249.595	1
chr12_93416760_93417160_minus	3.61e-05	0.00838688	-0.101528	91.3046	91.9676	0.000499795	0.00436211	-0.0901089	55.3685	61.0759	1
chr9_20535080_20537620_minus	0.000296859	0.0217141	-0.101538	632.67	695.037	4.6462e-06	0.000134854	-0.129048	392.175	465.446	1
chr3_23435220_23436120_plus	0.0010949	0.041515	-0.1023	95.3211	98.375	0.0128272	0.0500308	-0.086992	58.4932	62.6644	1
chr5_151114740_151115120_minus	0.000876282	0.0356722	-0.102755	77.5248	76.0509	0.000833844	0.00641902	-0.0958754	57.0671	62.5586	1
chr3_23404300_23405980_plus	0.000518785	0.0275639	-0.104182	179.321	187.139	1.65561e-05	0.000344554	-0.138979	108.389	121.768	1
chr8_120780640_120782490_minus	6.76e-06	0.00445155	-0.104339	497.571	504.477	0.00481501	0.0239466	-0.0635858	359.359	383.897	1
chr18_63188850_63193580_minus	0.000790679	0.0337082	-0.104544	1691.76	1750.54	3.45037e-07	1.9874e-05	-0.140198	1177.94	1379.8	1
chr6_90045340_90050360_minus	0.000307856	0.0218866	-0.105118	1466.9	1631.71	1.97966e-05	0.00039262	-0.114955	1032.7	1214.03	1
chr18_63140910_63141490_minus	0.00143607	0.0474739	-0.105187	134.596	140.898	0.000835282	0.00642819	-0.0992949	88.8671	101.968	1
chr3_23391110_23395960_plus	5.31e-05	0.00983832	-0.105361	654.703	683.859	0.000102856	0.00133227	-0.113613	433.63	484.462	1
chr4_25752920_25753640_minus	0.000236913	0.0196316	-0.105672	155.543	158.312	0.00317001	0.0174153	-0.0802191	93.4137	103.63	1
chr3_23385660_23388230_plus	0.000333995	0.0228583	-0.106073	322.198	332.144	4.28895e-05	0.000706727	-0.136912	193.329	216.428	1
chr7_92815530_92816170_minus	0.00019358	0.0174257	-0.106141	153.774	165.588	0.000223299	0.00240331	-0.0982793	99.1192	115.384	1
chr14_86087220_86088900_plus	0.000334312	0.0228583	-0.106194	150.028	154.618	0.00368542	0.0195896	-0.0828727	104.703	115.253	1
chr6_143690280_143691400_plus	0.000410097	0.0245519	-0.106434	105.881	107.081	1.79877e-05	0.000366445	-0.13556	69.7548	77.8782	1
chr4_38512550_38515410_plus	0.00126272	0.0445049	-0.106718	345.283	375.002	0.00148167	0.00978326	-0.0993201	238.548	276.048	1
chr10_7232940_7233080_minus	0.000458961	0.0261034	-0.106857	29.5505	31.2685	0.00493177	0.0244011	-0.0919163	18.6726	20.5563	1
chr7_92723590_92724540_minus	3.61e-05	0.00838688	-0.107099	178.442	190.539	0.00162465	0.0104853	-0.0739637	144.992	164.145	1
chr1_243725160_243725510_minus	0.000374058	0.0235849	-0.107594	64.0771	66.1319	0.000523183	0.00451777	-0.104809	45.6452	50.7494	1
chr13_73950440_73950640_minus	0.000622146	0.0300564	-0.10761	37.8073	39.4792	0.0227974	0.0759378	-0.070077	26.8274	29.7057	1
chrX_79254340_79265970_plus	0.00120986	0.0436895	-0.107746	2268.24	2310.12	0.0401677	0.114996	-0.0620125	1563.86	1722.25	1
chr4_53039680_53039940_minus	0.000492354	0.026764	-0.108125	53.0807	56.1551	2.30004e-06	8.01416e-05	-0.150363	34.189	39.2138	1
chr8_120748380_120748530_minus	0.00116053	0.0425188	-0.108548	30.0404	30.3519	0.0123935	0.0487776	-0.0836382	23.1233	25.0966	1
chr2_181373500_181374550_plus	0.00074768	0.0328258	-0.108756	100.248	100.822	0.000204212	0.00224805	-0.117496	70.2589	80.4069	1
chr16_27419910_27421550_plus	0.000958893	0.0378419	-0.109154	210.941	224.641	8.24024e-06	0.000208895	-0.129518	129.533	149.526	1
chr2_181310830_181315100_plus	0.000317806	0.0224031	-0.109925	642.864	675.049	0.00112475	0.0079966	-0.0950925	429.736	493.423	1
chr12_120008780_120013460_plus	7.49e-07	0.00208226	-0.110256	540.961	571.317	1.39228e-10	5.90051e-08	-0.135299	359.138	420.775	1
chr13_73712970_73713100_minus	0.00085451	0.0352873	-0.110272	22.6587	23.9213	0.000155142	0.00182518	-0.117965	19.7356	22.5586	1
chr1_28415180_28415810_plus	0.00045743	0.0261034	-0.111921	46.2862	46.2847	0.00174581	0.0110481	-0.0973295	31.1973	33.8207	1
chr8_120793220_120793710_minus	4.32e-06	0.0040179	-0.112065	99.6404	103.104	0.00827653	0.0358774	-0.065094	72.411	77.6161	1
chr7_92697930_92698170_minus	0.000462545	0.0261882	-0.112099	49.9193	53.8056	0.000723181	0.00576839	-0.107778	33.3753	39.1816	1
chr22_41862030_41863580_plus	0.000785307	0.0335937	-0.113198	144.288	145.877	7.42021e-05	0.0010638	-0.112836	100.032	109.91	1
chr21_15006210_15006560_minus	0.000161521	0.0158116	-0.113207	78.211	84.4722	0.00793158	0.0347349	-0.0710853	57.6849	62.754	1
chr6_127736340_127739460_minus	0.000322476	0.0226684	-0.11331	952.396	1021.48	0.000377855	0.0035745	-0.10611	619.597	705.405	1
chr3_99818570_99819680_plus	3.64e-05	0.00838688	-0.113703	102.554	110.069	0.000807978	0.00626809	-0.0915559	67.2726	75.9632	1
chr16_78841570_78847320_plus	0.000273936	0.0208366	-0.113711	689.066	709.396	1.23466e-07	9.37155e-06	-0.168868	433.674	499.11	1
chr7_92698670_92698800_minus	0.000453823	0.026048	-0.113755	25.3303	27.1782	0.0110675	0.0448121	-0.0840019	16.9014	19.4644	1
chr18_63176930_63188600_minus	8.17e-05	0.0122366	-0.114449	4576	4868.67	7.53153e-06	0.000194685	-0.116331	3186.49	3666.11	1
chr7_18404650_18406060_plus	0.00130003	0.0448735	-0.115738	160.807	162.373	0.000261972	0.00270975	-0.136374	120.897	133.703	1
chr3_23328550_23330860_plus	3.92e-05	0.00838688	-0.116062	307.402	314.417	4.65322e-06	0.000134907	-0.142348	193.226	216.189	1
chr6_127739680_127741000_minus	0.000166301	0.0160065	-0.116838	324.475	343.356	6.83093e-05	0.000999635	-0.118298	200.296	228.867	1
chr18_63140020_63140330_minus	0.00113811	0.042425	-0.11695	59.4459	62.4699	9.78678e-07	4.26085e-05	-0.173812	38.3397	46.0253	1
chr7_92720080_92720820_minus	3.26e-07	0.00163096	-0.117116	144.004	152.44	5.92447e-05	0.000904125	-0.0953257	96.8219	111.359	1
chr7_92652970_92653240_minus	0.000197538	0.0176404	-0.117445	55.1468	58.3472	0.00131307	0.00893505	-0.0922716	39.4616	44.977	1
chr3_23319510_23322900_plus	1.2e-05	0.00555715	-0.11767	475.437	490.991	0.000133713	0.00162749	-0.110564	291.333	320.855	1
chr9_3607710_3610130_plus	0.000525683	0.0278091	-0.117802	269.145	268.09	4.8622e-06	0.000139795	-0.144053	148.889	168.487	1
chr7_92809310_92809500_minus	0.00154292	0.0495218	-0.117971	38.0679	41.6806	0.0286203	0.089982	-0.0752951	27.2247	31.2713	1
chr3_23376050_23379200_plus	2.53e-05	0.0073044	-0.11848	448.211	466.132	4.89714e-05	0.000781231	-0.126467	268.299	299.186	1
chr2_181347870_181350570_plus	0.000258045	0.0203727	-0.118819	249.947	265.505	0.00363824	0.0194022	-0.093999	174.129	198.726	1
chr7_92812250_92812810_minus	1.27e-05	0.00555715	-0.118849	114.288	123.097	0.000388705	0.00366001	-0.0925303	77.3932	89.3402	1
chr16_78796640_78804600_plus	4.74e-05	0.00904533	-0.118922	947.572	973.514	6.95058e-09	1.18273e-06	-0.171171	609.803	702.566	1
chr13_74017780_74017980_minus	0.000238356	0.019686	-0.119814	43.1633	45.7755	0.0136214	0.0522287	-0.0798416	29.3425	32.3333	1
chr6_90068300_90069670_minus	0.000354918	0.0232213	-0.120326	396.778	440.824	9.18004e-05	0.0012303	-0.120058	266.649	310.777	1
chr6_90161490_90166200_minus	0.00151955	0.0490716	-0.120935	1396.6	1571.99	1.32617e-06	5.39483e-05	-0.176273	749.24	913.924	1
chr7_92665790_92666490_minus	1.34e-06	0.00246416	-0.122393	169.431	178.123	1.40159e-05	0.000308978	-0.104975	113.722	129.982	1
chr6_90110610_90112470_minus	0.00138274	0.0462607	-0.123651	522.389	600.005	0.000620194	0.0051472	-0.125503	332.729	395.71	1
chr2_181406610_181408450_plus	2.14e-05	0.0067884	-0.123848	187.58	199.711	0.000442557	0.0040059	-0.0973137	147.108	165.69	1
chr18_63235640_63243500_minus	0.000445349	0.0258582	-0.124019	3861.84	4107.98	7.15885e-06	0.000186754	-0.137248	2526.05	2931.31	1
chr16_78787600_78795010_plus	6.47e-05	0.0106562	-0.124048	835.659	870.299	2.33882e-08	2.85878e-06	-0.170022	514.749	593.634	1
chrX_1488870_1491810_minus	0.000250451	0.0202178	-0.124252	2413.58	2474.22	0.00314914	0.0173409	-0.0862434	1517.33	1611.77	1
chr6_90144760_90148720_minus	0.00123111	0.044265	-0.124331	1171.25	1329.12	7.60115e-06	0.000195936	-0.164278	734.553	895.087	1
chr7_18552340_18555590_plus	0.000673153	0.0314145	-0.12479	354.675	363.623	7.9348e-05	0.00111546	-0.126194	250.788	284.634	1
chr3_27393540_27393690_minus	2.94e-05	0.00774954	-0.12498	31.7266	33.5046	0.00646383	0.0297956	-0.0856114	21.8945	24.6759	1
chr6_127732230_127734070_minus	0.00036576	0.0232904	-0.125072	376.879	409.803	0.000492142	0.00431739	-0.110182	282.796	320.984	1
chr6_90175840_90180210_minus	0.000534012	0.0280161	-0.126934	1831.36	2086.31	8.4734e-05	0.00116108	-0.136143	1053.16	1257.05	1
chr7_92762160_92762310_minus	0.000782683	0.0335814	-0.127078	33.6018	37.0394	0.0025511	0.0147497	-0.102101	29.1521	34.108	1
chr18_63287760_63293450_minus	0.00047044	0.0264652	-0.128522	2705.55	2867.62	4.36556e-05	0.000714377	-0.126401	1847.61	2144.38	1
chr16_78891720_78893980_plus	0.000384613	0.0237067	-0.128564	180.145	188.993	5.8887e-06	0.000162235	-0.169445	111.553	126.991	1
chr16_78805290_78811230_plus	8.86e-05	0.0126743	-0.129523	638.286	670.368	7.46024e-08	6.63982e-06	-0.173929	405.867	469.947	1
chr18_63227270_63230220_minus	0.000516531	0.0275025	-0.130001	1169.52	1228	1.76859e-05	0.000361992	-0.145922	741.351	862.421	1
chr18_63230640_63235470_minus	4.06e-05	0.00846283	-0.130327	2428.53	2599.74	1.51171e-06	5.89182e-05	-0.142192	1417.91	1671.47	1
chr6_90124400_90124840_minus	0.00142185	0.0472809	-0.131754	84.6844	97.0972	0.000193907	0.00216112	-0.150717	55.4932	66.9172	1
chr7_92638320_92638500_minus	1.39e-05	0.0056182	-0.132006	28.8734	30.8287	0.00517802	0.0253116	-0.0875048	20.9356	23.7034	1
chrX_79218460_79223580_plus	2.78e-05	0.00774954	-0.132006	689.628	692.866	2.79336e-05	0.000508923	-0.122504	476.063	542.253	1
chr18_63148520_63149090_minus	1.51e-05	0.00591068	-0.132432	122.972	131.803	1.67444e-06	6.31797e-05	-0.145695	70.9055	84.5977	1
chr16_78795120_78796510_plus	3.87e-05	0.00838688	-0.132673	239.855	250.461	4.19988e-08	4.40903e-06	-0.170876	139.53	162.823	1
chr18_63202070_63205710_minus	9.64e-05	0.0133468	-0.132857	1301.2	1381.45	3.08697e-07	1.82658e-05	-0.161675	808.097	950.221	1
chr6_90141770_90143820_minus	0.000484358	0.0266397	-0.13371	494.228	564.9	7.39609e-05	0.00106151	-0.142088	316.556	377.379	1
chr7_92653480_92653770_minus	1.26e-05	0.00555715	-0.134756	50.5468	54.0255	1.10834e-06	4.67678e-05	-0.14052	37.4932	44.3609	1
chr16_78757760_78766630_plus	1.92e-05	0.00641856	-0.134876	1192.88	1260.03	3.16592e-07	1.86621e-05	-0.145933	813.844	923.03	1
chr1_61141550_61141740_plus	0.00132471	0.0452302	-0.135654	14.6477	15.2014	0.0439459	0.122669	-0.0818673	11.0658	11.9011	1
chr7_92721080_92721240_minus	5.93e-06	0.00412293	-0.139988	28.9156	31.1319	0.0154616	0.0573749	-0.0735158	21.0178	23.7379	1
chr11_83056290_83056420_minus	0.000820069	0.0344333	-0.140787	24.5725	27.338	0.0150518	0.0563035	-0.0971981	17.4288	20.4115	1
chr6_90152020_90153490_minus	0.00075197	0.0328987	-0.141112	412.631	477.752	1.29325e-06	5.29399e-05	-0.194152	252.629	315.547	1
chr7_92709760_92709900_minus	5.47e-05	0.00999691	-0.142625	30.8862	34.0741	0.000110869	0.00141078	-0.130023	23.4973	27.6138	1
chr14_68096380_68097090_plus	8.91e-06	0.00505572	-0.142648	78.6624	83.6968	0.000167471	0.00192754	-0.14306	45.7699	51.7195	1
chr6_90119710_90121150_minus	0.000242445	0.0198924	-0.146419	343.031	400.539	2.17394e-05	0.000423324	-0.161743	215.573	261.377	1
chr18_63174330_63174470_minus	0.000345695	0.0231729	-0.147141	27.3046	28.6042	4.58683e-05	0.000744037	-0.155752	20.8726	24.7586	1
chr7_18460780_18461160_plus	0.00126116	0.0445049	-0.148096	27.6165	27.4931	0.0125317	0.0491509	-0.116087	19.5945	21.4138	1
chr5_14444820_14445190_plus	0.000257956	0.0203727	-0.148708	29.9596	30.7569	0.000406952	0.00378162	-0.144634	18.9712	21.3448	1
chr16_78833770_78837920_plus	4.5e-06	0.0040179	-0.14936	564.794	601.493	5.18419e-08	5.01289e-06	-0.179307	355.362	411.63	1
chr18_63173290_63174080_minus	8.32e-05	0.0123238	-0.149488	201.527	217.222	1.71138e-06	6.42717e-05	-0.176146	126.021	151.729	1
chr18_63205860_63206280_minus	0.0013659	0.0460049	-0.149506	120.91	129.644	0.0178954	0.0637507	-0.0920225	71.411	80.2736	1
chr2_198032180_198032660_plus	0.000765366	0.0332721	-0.15443	38.8459	42.7454	0.000120342	0.00150921	-0.17746	26.9425	32.377	1
chr10_74167470_74167810_plus	4.69e-05	0.00904533	-0.155374	30.1193	33.4074	0.0298369	0.0927084	-0.0868128	18.989	21.1747	1
chr3_99824450_99824710_plus	8e-05	0.0121362	-0.157321	20.3798	22.5301	0.0228075	0.0759619	-0.0989566	12.6836	14.5103	1
chr16_78782450_78785540_plus	3.85e-06	0.00385136	-0.157721	386.712	409.5	1.80961e-07	1.23982e-05	-0.169757	222.526	257.529	1
chr12_47239330_47239670_plus	0.000399365	0.0242575	-0.157824	24.3064	25.9653	0.000360692	0.00345624	-0.151925	18.6219	21.7885	1
chr6_90127660_90128000_minus	0.000118812	0.013959	-0.161522	58.4	66.75	0.0012231	0.0084893	-0.132977	39.7603	47.2943	1
chr7_92752030_92752200_minus	1.55e-05	0.00591068	-0.163312	34.356	38.5625	0.00432655	0.0221126	-0.0971369	27.111	31.2069	1
chr16_78915670_78917350_plus	1.51e-06	0.00252357	-0.163411	125.42	132.606	4.62956e-07	2.48517e-05	-0.174068	86.5575	99.7172	1
chr8_59017010_59017130_minus	0.000554878	0.0282718	-0.167995	22.3615	23.8171	0.000854516	0.00654014	-0.148157	16.3644	18.7816	1
chr12_120046600_120046830_plus	0.000111884	0.0136581	-0.169331	16.5303	17.8657	0.000385313	0.0036307	-0.151986	12.5603	14.8621	1
chr6_90033810_90034180_minus	2.86e-05	0.00774954	-0.169801	72.8275	84.2778	1.16664e-05	0.000269031	-0.160844	45.4	54.9839	1
chrX_56395070_56397080_plus	7.72e-05	0.011999	-0.170896	164.554	184.34	0.00406524	0.0211044	-0.120401	121.515	140.533	1
chr16_78777460_78777900_plus	0.000281884	0.0211441	-0.171391	32.9248	33.9977	2.39997e-05	0.000457083	-0.196282	23.2014	27.0989	1
chr18_63285900_63286290_minus	0.00045831	0.0261034	-0.171785	78.5321	85.4537	0.00138516	0.00932953	-0.139023	50.0534	57.9885	1
chr16_78915350_78915530_plus	0.000751417	0.0328987	-0.171927	12.1578	12.9167	0.00105643	0.0076337	-0.159802	8.25479	9.37471	1
chr3_23251410_23251550_plus	4.61e-05	0.00901288	-0.190565	12.545	13.5926	0.000854602	0.00654014	-0.163934	7.75342	8.90115	1

## Sheet: Replicated DE circRNAs
	pvalue_Dis	padj_Dis	log2FoldChange_Dis	baseMean_raw.Case_Dis	baseMean_raw.Control_Dis	pvalue_Rep	padj_Rep	log2FoldChange_Rep	baseMean_raw.Case_Rep	baseMean_raw.Control_Rep	Direction
chr1_17341942_17342402_plus	1.3926e-07	7.57576e-05	0.215407	5.68356	4.98744	0.000665214	0.0266597	0.163965	4.40375	3.8756	1
chrX_148651998_148662768_plus	6.4148e-08	7.57576e-05	0.210782	4.77709	4.30968	1.12847e-07	5.87932e-05	0.197672	5.16838	4.52459	1
chr2_218385146_218387955_plus	5.91186e-06	0.00137831	0.206788	2.72847	2.52033	0.0246055		0.12361	1.9272	1.75988	1
chr7_75162325_75163019_minus	2.22271e-06	0.000604577	0.175483	5.94232	5.56024	0.00192803	0.0490003	0.13066	5.06208	4.53809	1
chr9_92975237_92976709_plus	3.24164e-05	0.00480941	0.175239	2.72064	2.56393	3.49661e-05	0.00421523	0.206014	2.29031	1.99518	1
chr7_75166536_75166877_minus	0.000236431	0.0226974	0.159064	3.1541	2.88618	0.00679261	0.104087	0.129638	2.75793	2.48505	1
chr19_45521321_45522818_plus	0.000922414	0.0499957	0.149828	2.81335	2.63267	0.00799287	0.117304	0.140762	2.30907	2.07232	1
chr18_76441244_76443211_minus	2.15937e-05	0.00391566	0.146093	6.5204	6.31264	9.71516e-05	0.0092029	0.143866	6.85172	6.11765	1
chr16_31361835_31362753_plus	6.5594e-07	0.000267623	0.135196	27.3646	26.1811	0.0104032	0.135502	0.0780576	20.8548	19.6239	1
chr11_47358843_47360040_minus	0.000508963	0.0395537	0.124694	5.178	4.96748	1.86496e-06	0.000647762	0.189824	5.4042	4.68949	1
chr8_38943788_38946221_plus	0.000818887	0.0472162	0.121526	4.99464	4.71175	0.0046226	0.0789631	0.119824	3.84591	3.52941	1
chrX_148661907_148662768_plus	1.42554e-06	0.000465296	0.119746	39.0284	37.3555	1.05265e-08	1.09686e-05	0.136182	42.2747	38.3182	1
chr19_17101659_17102557_plus	5.68045e-05	0.00662178	0.108089	17.3247	17.0347	0.0024766	0.0573471	0.090539	14.5574	13.5526	1
chr11_47358843_47375729_minus	0.000955476	0.0499957	0.0972554	13.1978	12.9032	0.00288178	0.061282	0.0967848	13.3001	12.1977	1
chr3_172247532_172251541_plus	3.54711e-05	0.00482408	0.0915043	28.9415	29.5122	0.00425364	0.0789631	0.0662352	23.2385	22.3375	1
chr2_226864603_226867318_plus	0.000138591	0.0141363	-0.0622686	55.3782	60.4117	2.07729e-05	0.0030922	-0.0723239	44.8508	48.1302	1
chr16_11020192_11061022_plus	0.00043541	0.0373994	-0.0628692	27.2505	29.6268	0.0430174	0.287334	-0.0440082	22.226	22.8862	1
chr15_41356038_41377304_plus	0.000612226	0.0399661	-0.0826152	43.4256	48.0074	0.00875173	0.124941	-0.0640642	39.5645	42.4002	1
chr1_205268949_205269884_plus	0.00103736	0.0499957	-0.104667	5.63288	6.24538	0.00102258	0.0354744	-0.123537	4.79098	5.17068	1
chr3_196064308_196069568_minus	0.00107221	0.0499957	-0.116008	7.05727	7.77975	0.00577385	0.0950679	-0.105742	5.41	6.12922	1
chr5_97101758_97103094_plus	0.000839014	0.0472162	-0.1507	4.04656	4.85957	0.00328517	0.0671205	-0.149399	3.89772	4.61524	1
