# Supplementary figures and images for: Multi-omics machine learning classifier and blood transcriptomic signature of Parkinson’s disease
Source: Research Square preprint supplement (doi:10.21203/rs.3.rs-6837659/v1), 2025-06-20

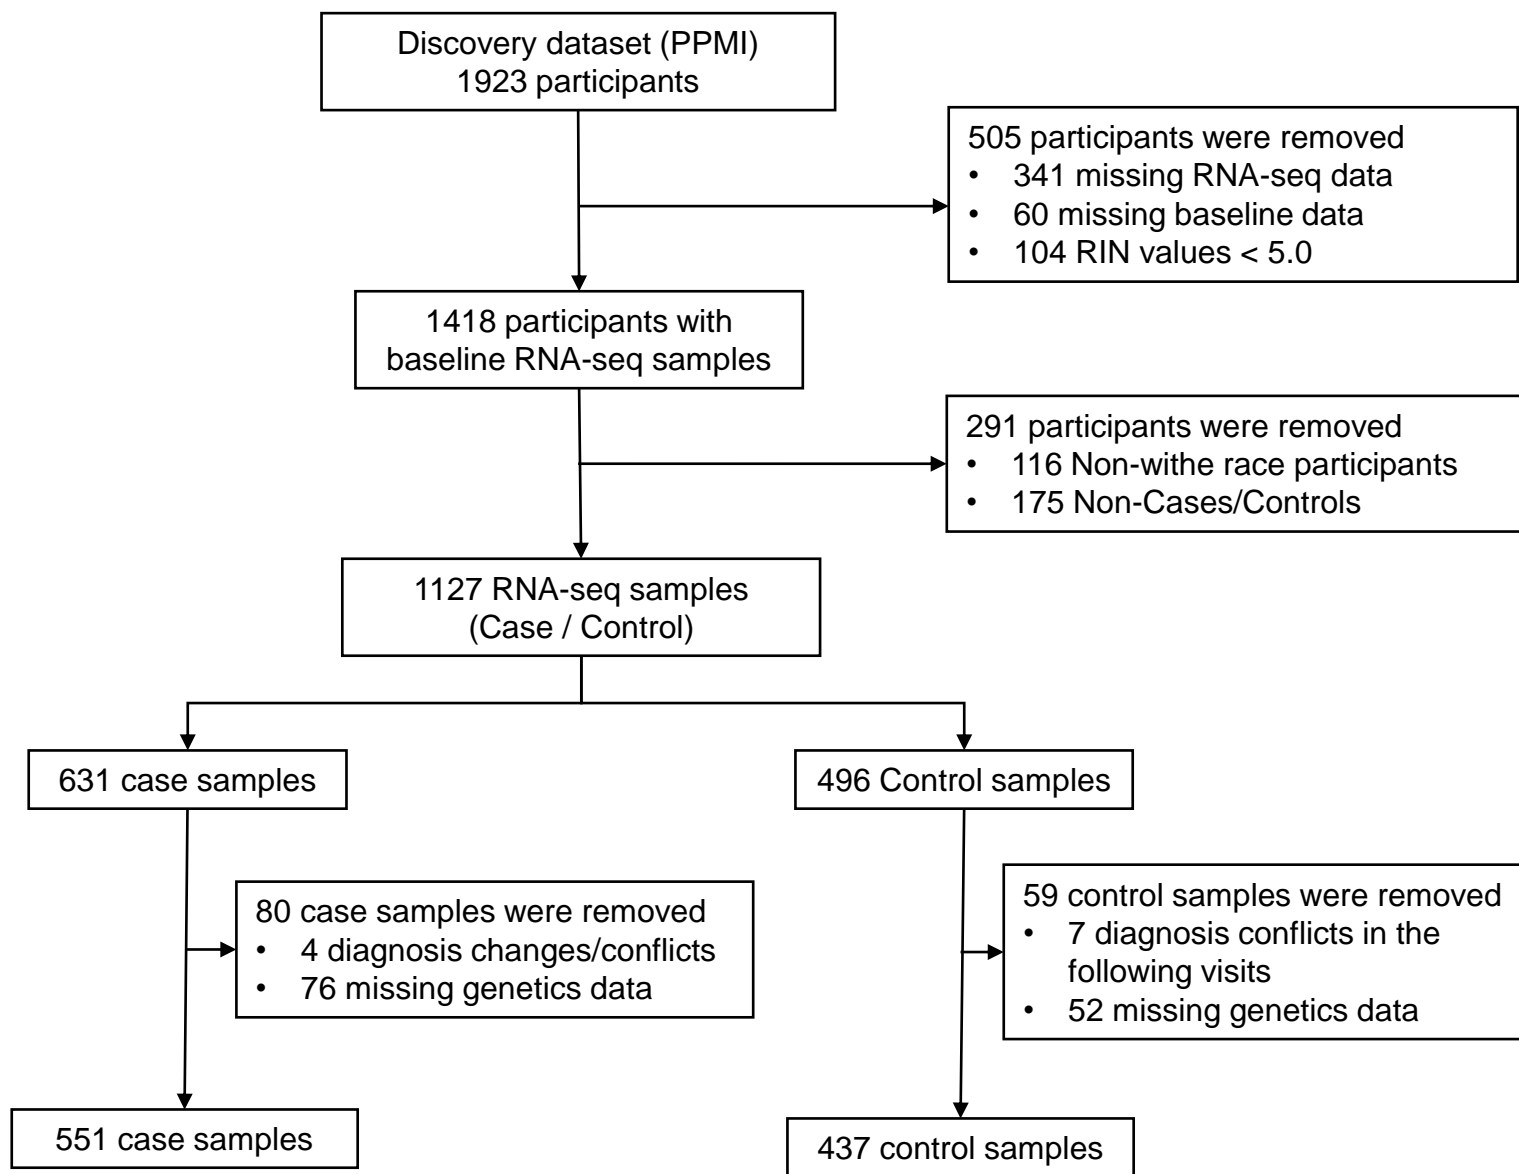

Supplement: Supplementary file 1 [file 70762e3d602fc4cb0832f65e.pdf]

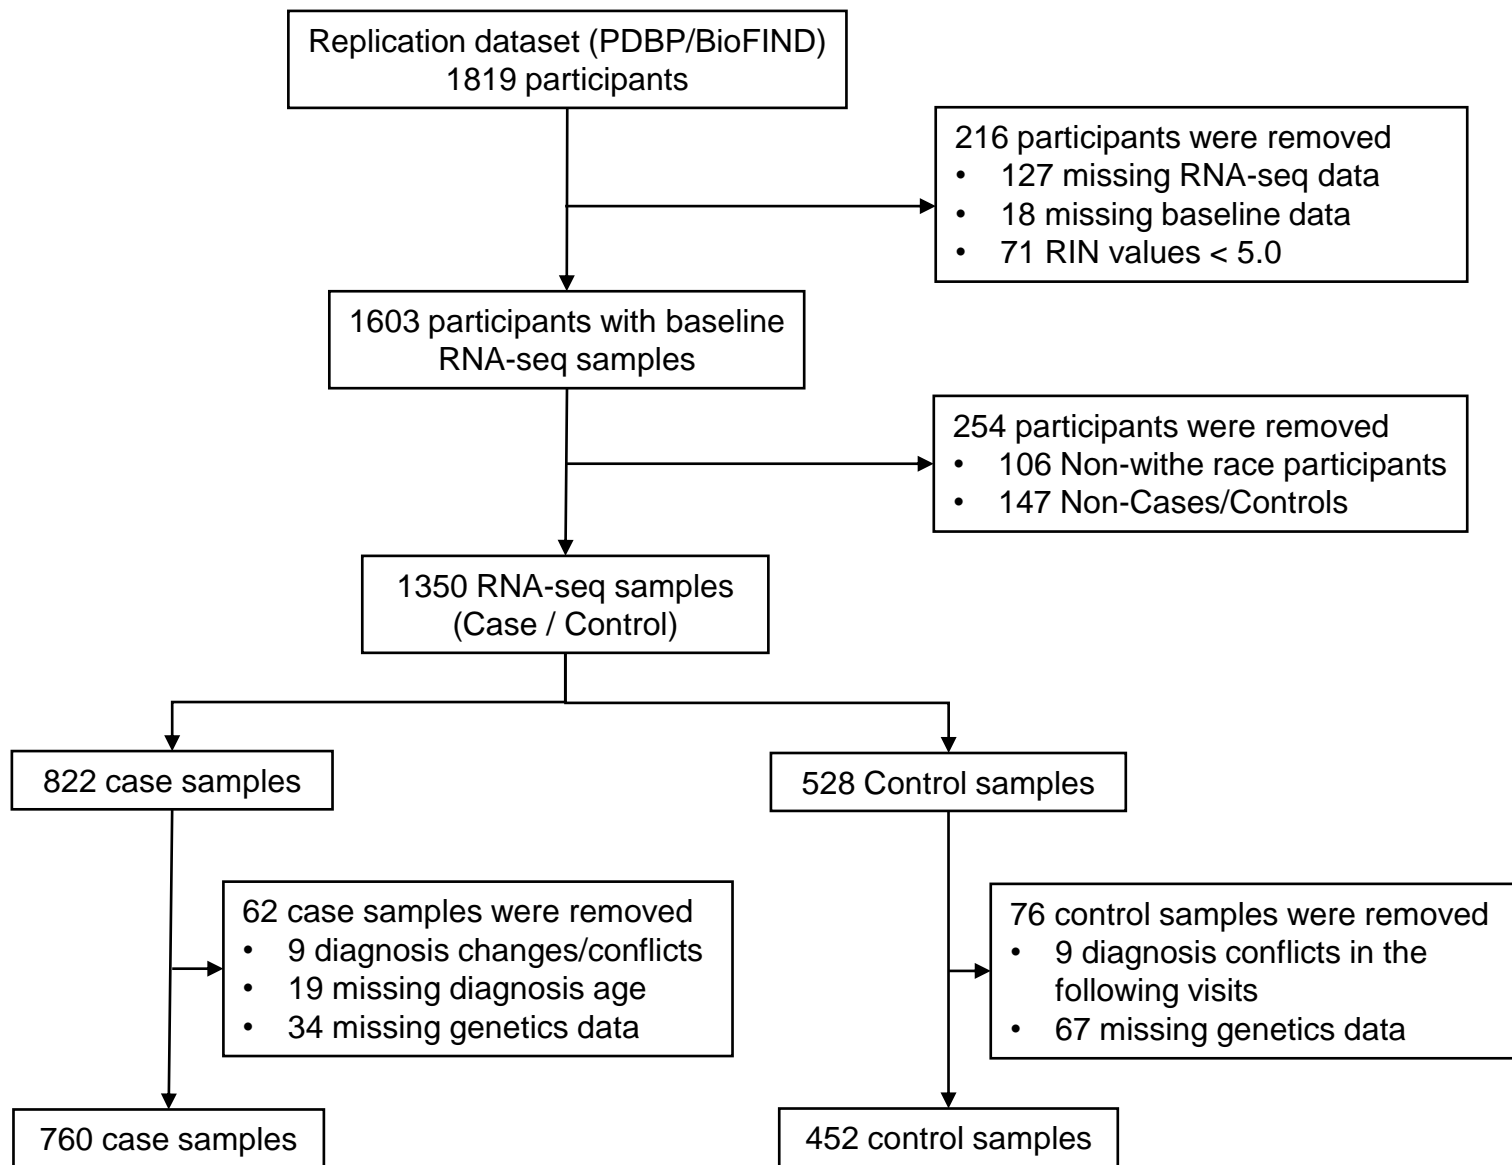

Supplement: Supplementary file 2 [file 7a4430b6921ffb4513a3e19d.pdf]
